# Supplementary material for: Assessing the donor ability of boratabenzene and 9-borataphenanthrene anions through metal complexes with carbonyl ligands
Source: Royal Society of Chemistry journal article supplement (doi:10.1039/d2dt02795j), 2022-01-01
Supplement: d2dt02795j1.pdf [file d2dt02795j1.pdf]

Supporting Information for:  
“Assessing the Donor Ability of Boratabenzene and  
9-Borataphenanthrene Anions through Metal  
Complexes with Carbonyl Ligands”

*Katherine Rojas<sup>†</sup>, Masilamani Tamizmani<sup>†</sup>, Tyler A. Bartholome, and Caleb D. Martin\**

Baylor University, Department of Chemistry and Biochemistry, One Bear Place #97348, Waco,  
TX 76798

# Table of Contents

|                                               |     |
|-----------------------------------------------|-----|
| Multinuclear NMR spectra for <b>1Cr</b> ..... | S3  |
| FT-IR spectrum of <b>1Cr</b> .....            | S10 |
| Multinuclear NMR spectra for <b>1Mo</b> ..... | S11 |
| FT-IR spectrum of <b>1Mo</b> .....            | S18 |
| Multinuclear NMR spectra for <b>1W</b> .....  | S19 |
| FT-IR spectrum of <b>1W</b> .....             | S24 |
| Multinuclear NMR spectra for <b>2Mo</b> ..... | S25 |
| FT-IR spectrum of <b>2Mo</b> .....            | S32 |
| Multinuclear NMR spectra for <b>2W</b> .....  | S33 |
| FT-IR spectrum of <b>2W</b> .....             | S40 |
| Multinuclear NMR spectra for <b>1Rh</b> ..... | S41 |
| FT-IR spectrum of <b>1Rh</b> .....            | S49 |
| Multinuclear NMR spectra for <b>2Rh</b> ..... | S50 |
| FT-IR spectrum of <b>2Rh</b> .....            | S55 |
| X-ray crystallographic details .....          | S56 |
| Theoretical Calculations .....                | S57 |
| References .....                              | S66 |

Figure S-1:  $^1\text{H}$  NMR spectrum of **1Cr** in  $\text{CD}_3\text{CN}$  (\*residual diethyl ether)

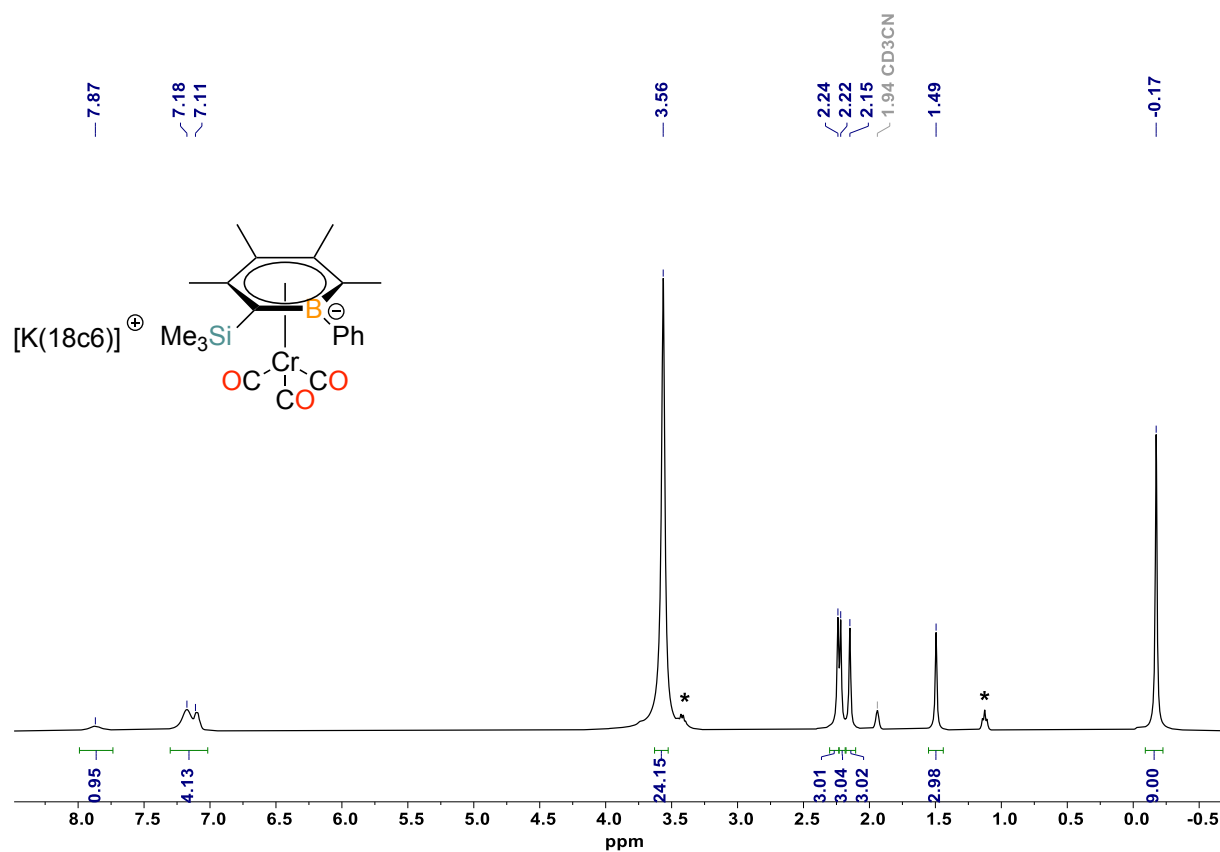

Figure S-2: Expansion of  $^1\text{H}$  NMR spectrum of **1Cr** in  $\text{CD}_3\text{CN}$  (\*residual diethyl ether).

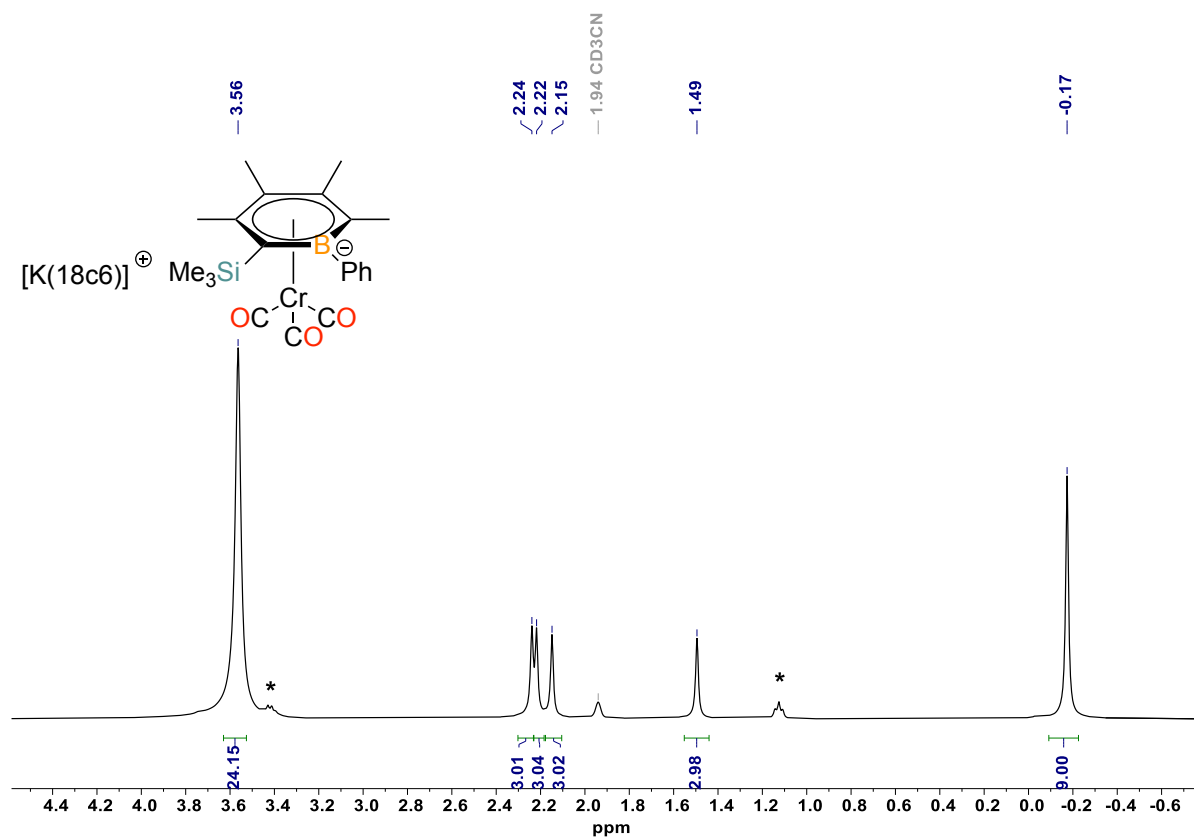

Figure S-3:  $^1\text{H}$  Variable Temperature-NMR spectra of **1Cr** in  $\text{C}_6\text{D}_6$  (\*residual diethyl ether).

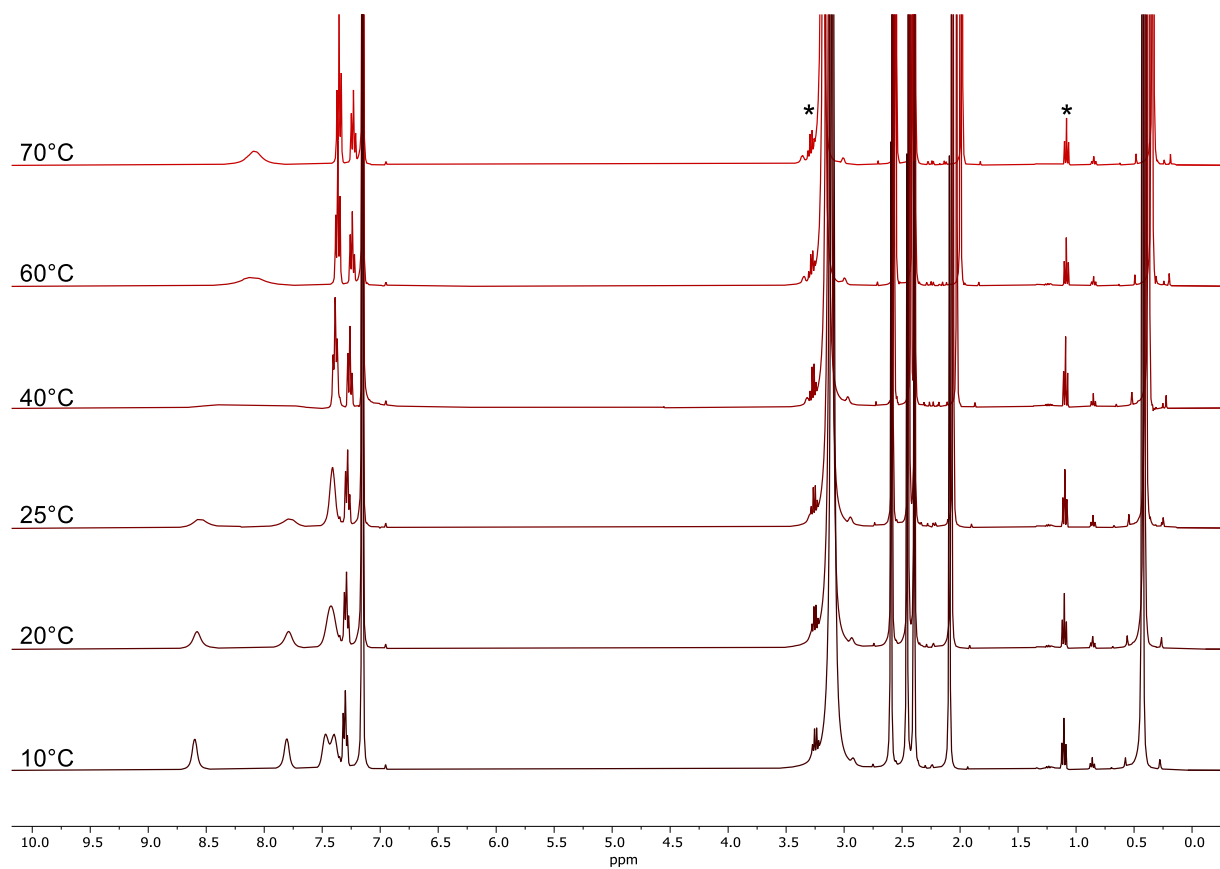

Figure S-4:  $^{13}\text{C}\{^1\text{H}\}$  NMR spectrum of **1Cr** in  $\text{CD}_3\text{CN}$  ( $^*\text{CD}_3\text{CN}$ ).

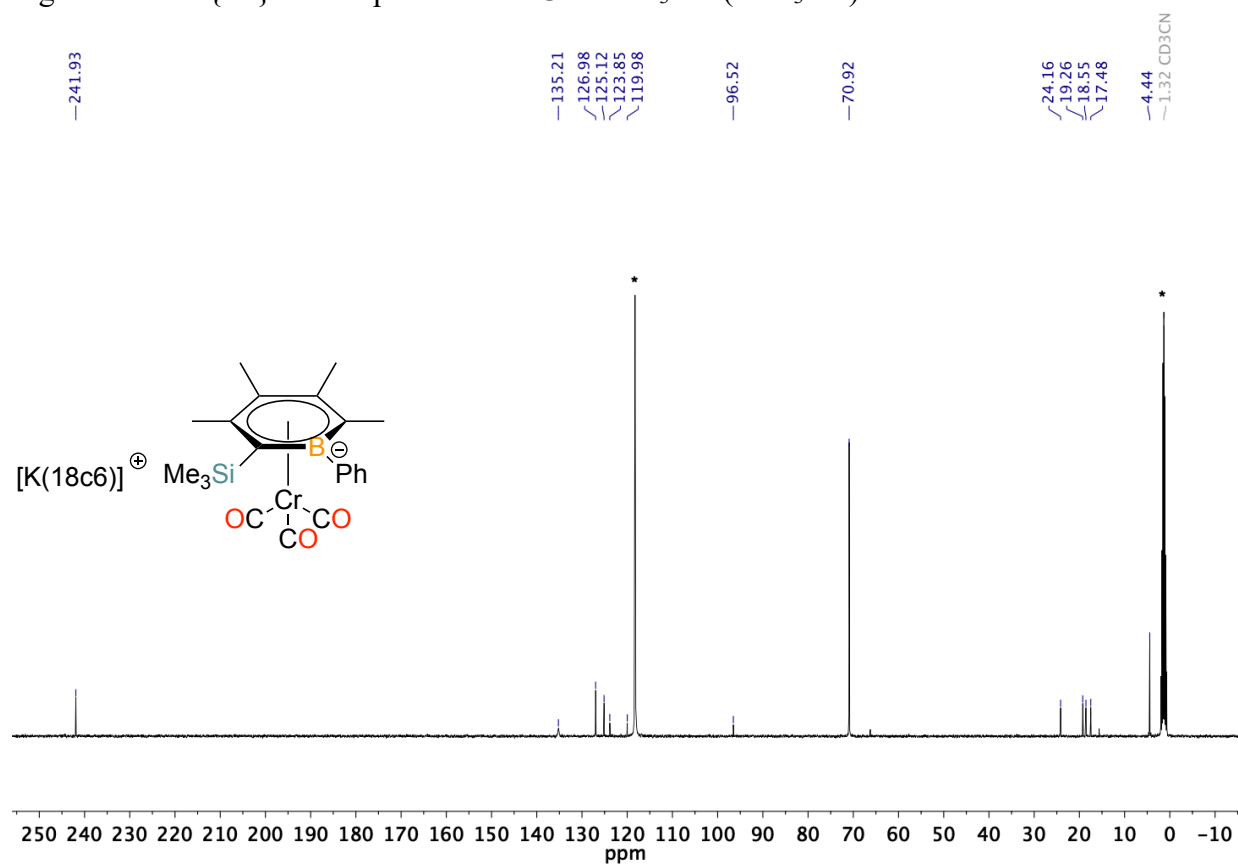

Figure S-5: Expansion of  $^{13}\text{C}\{^1\text{H}\}$  NMR spectrum of **1Cr** in  $\text{CD}_3\text{CN}$  ( $^*\text{CD}_3\text{CN}$ ).

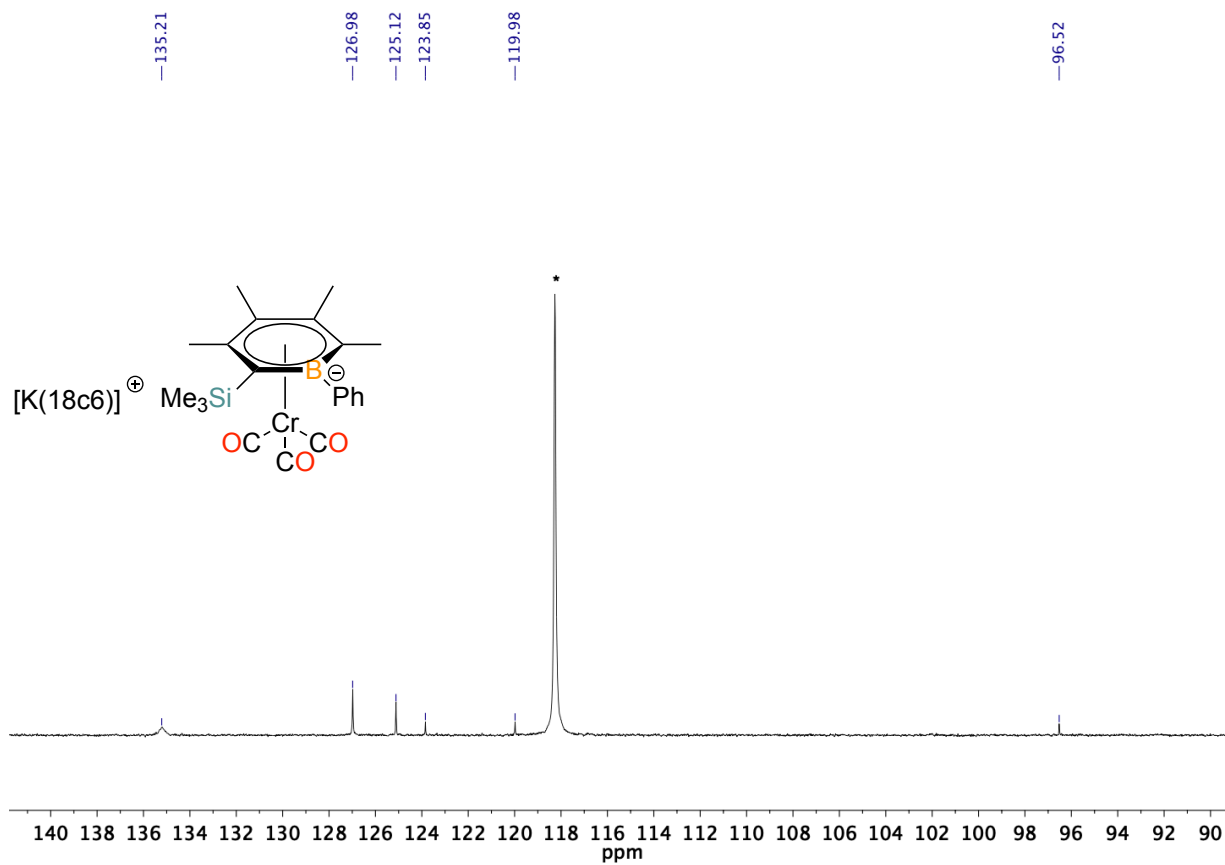

Figure S-6: Expansion of  $^{13}\text{C}\{^1\text{H}\}$  NMR spectrum of **1Cr** in  $\text{CD}_3\text{CN}$  (\*diethyl ether).

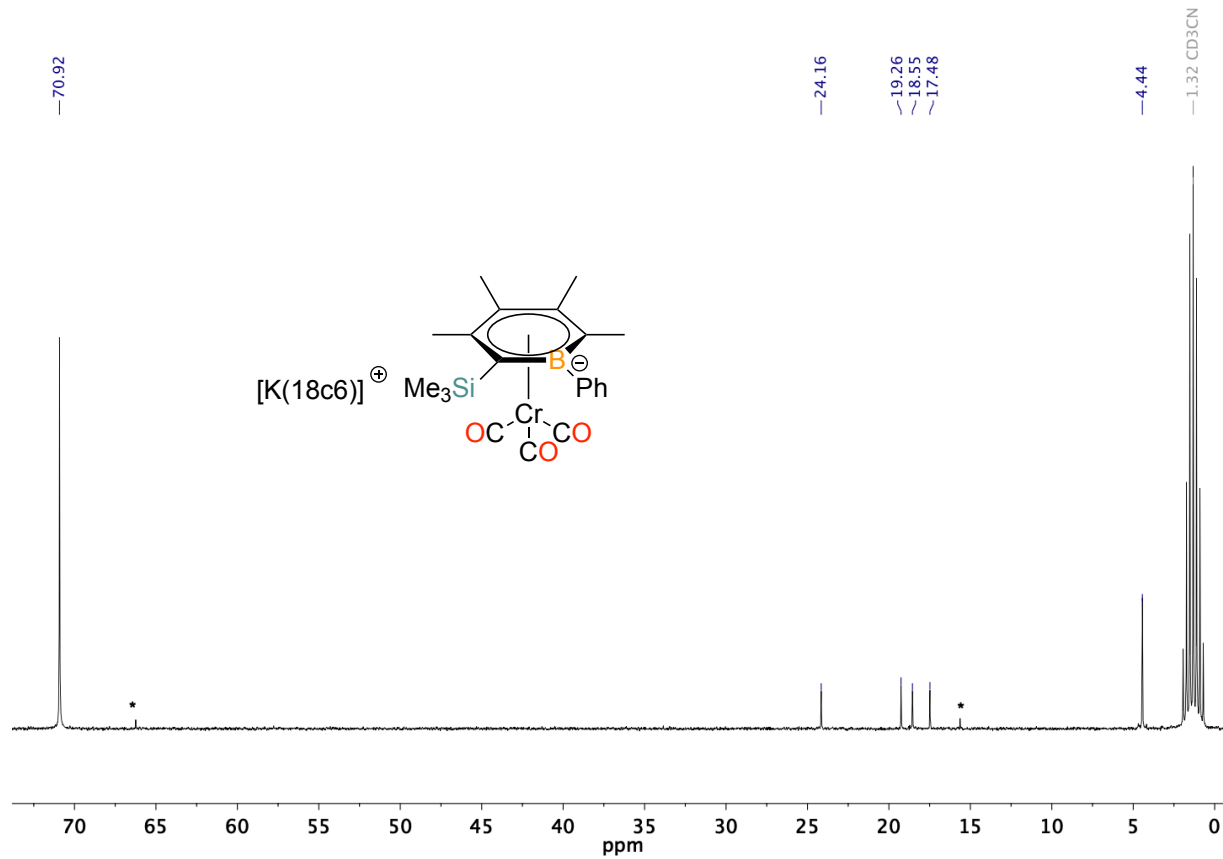



Figure S-7:  $^{11}\text{B}$  NMR spectrum of **1Cr** in  $\text{CD}_3\text{CN}$ .

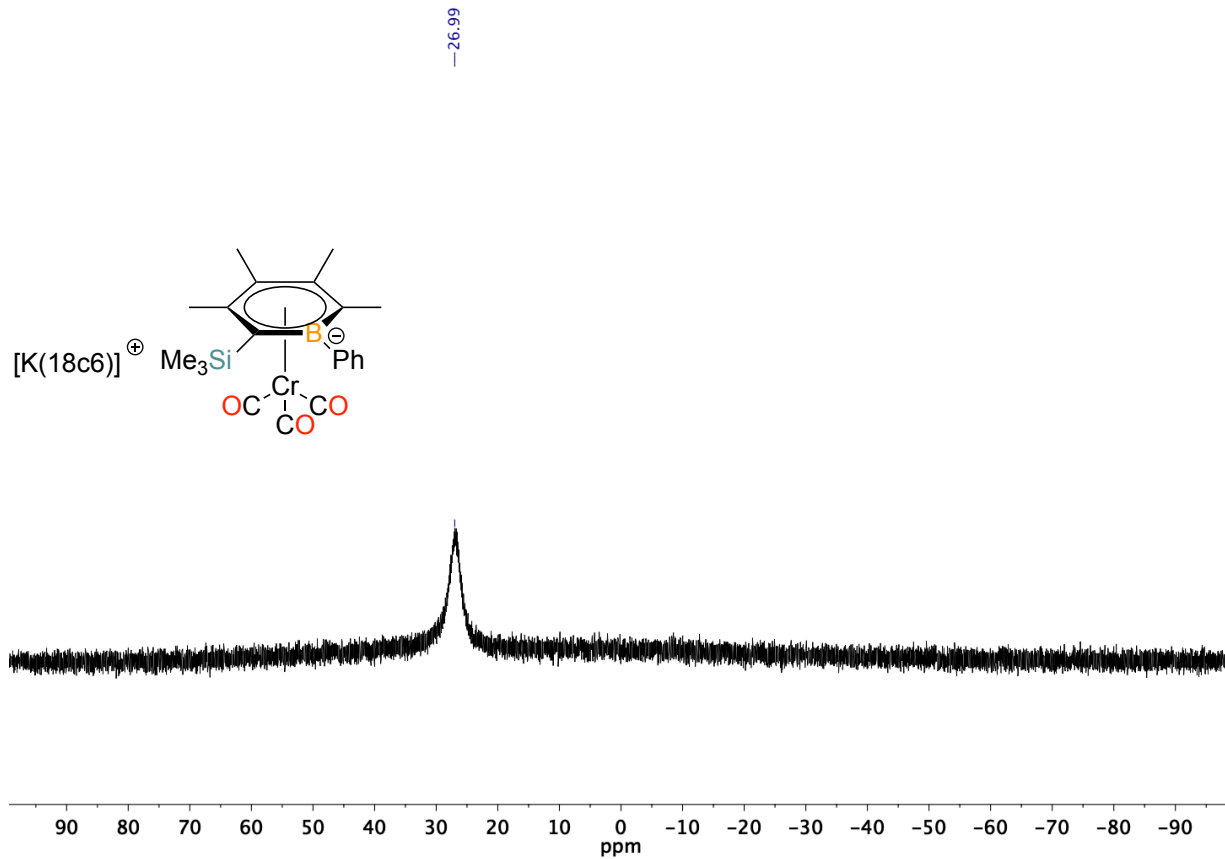

Figure S-8: FT-IR spectrum of **1Cr**.

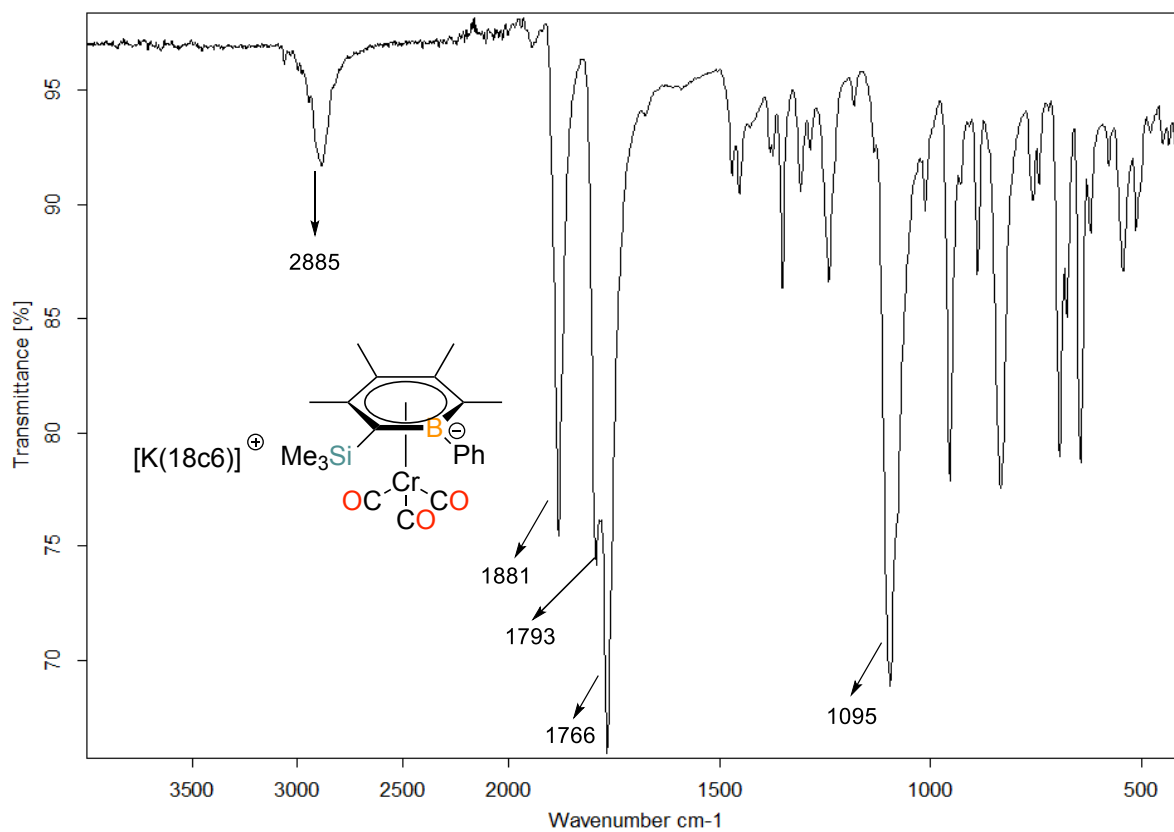

Figure S-9:  $^1\text{H}$  NMR spectrum of **1Mo** in  $\text{CD}_3\text{CN}$  (\*diethyl ether)

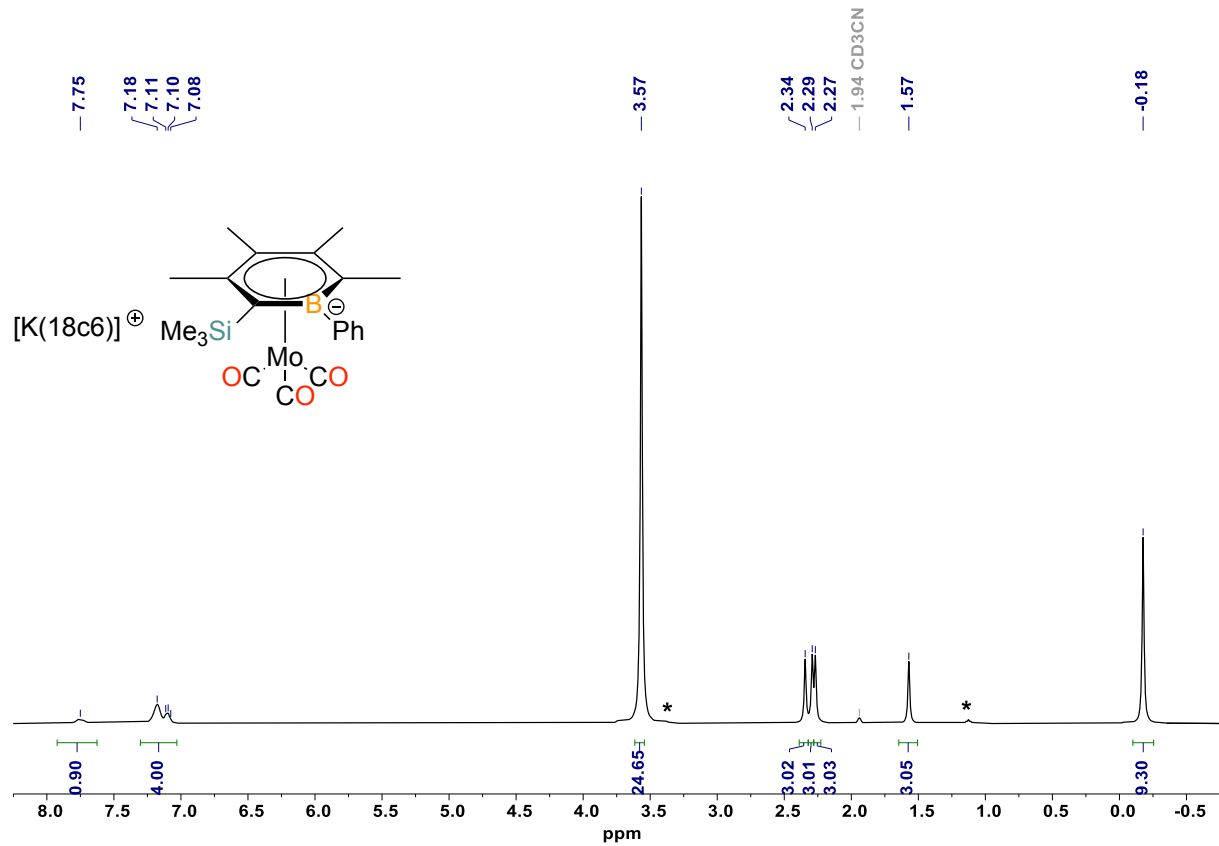

Figure S-10:  $^1\text{H}$  VT-NMR spectra of **1Mo** in  $\text{C}_6\text{D}_6$  (\*diethyl ether and hexanes)

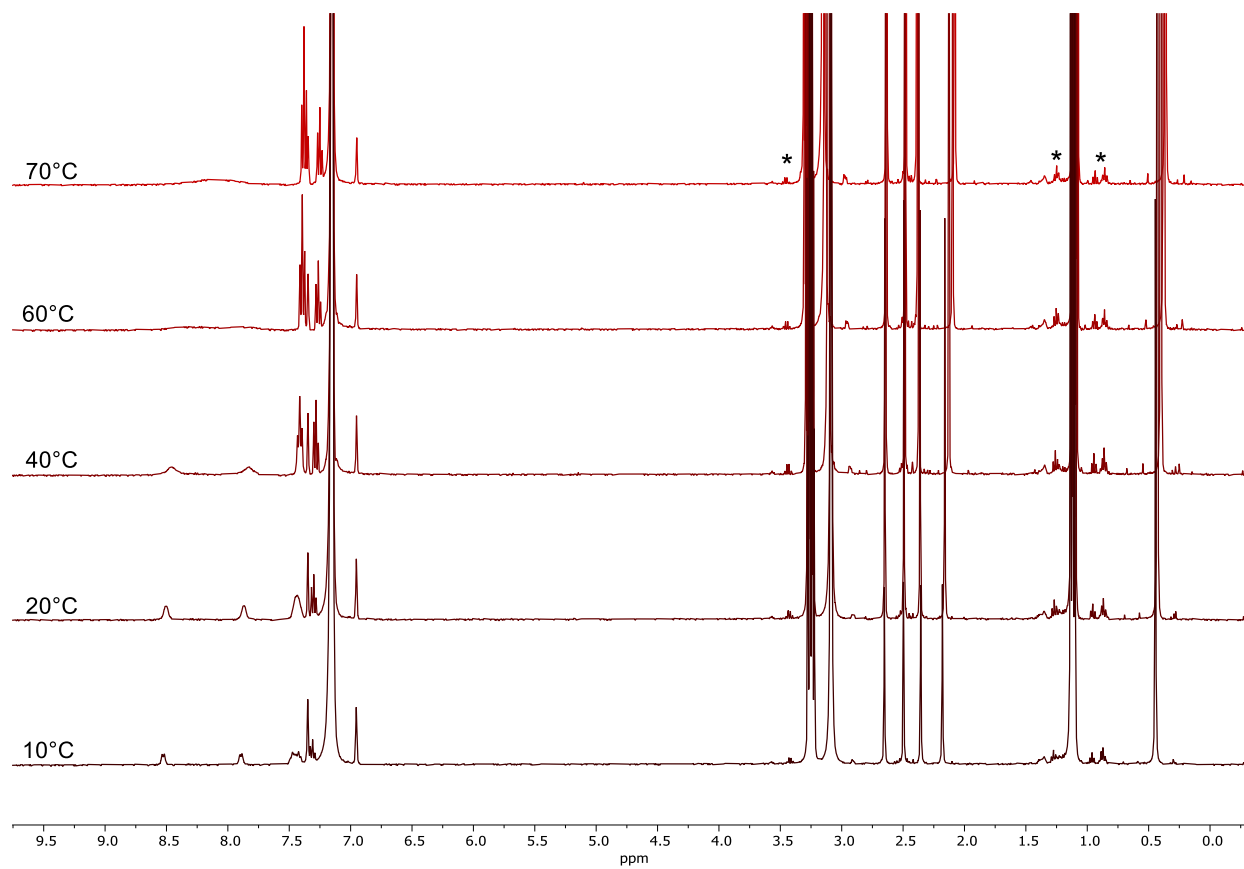

Figure S-11: Expansion of  $^1\text{H}$  NMR spectrum of **1Mo** in  $\text{CD}_3\text{CN}$  (\*diethyl ether).

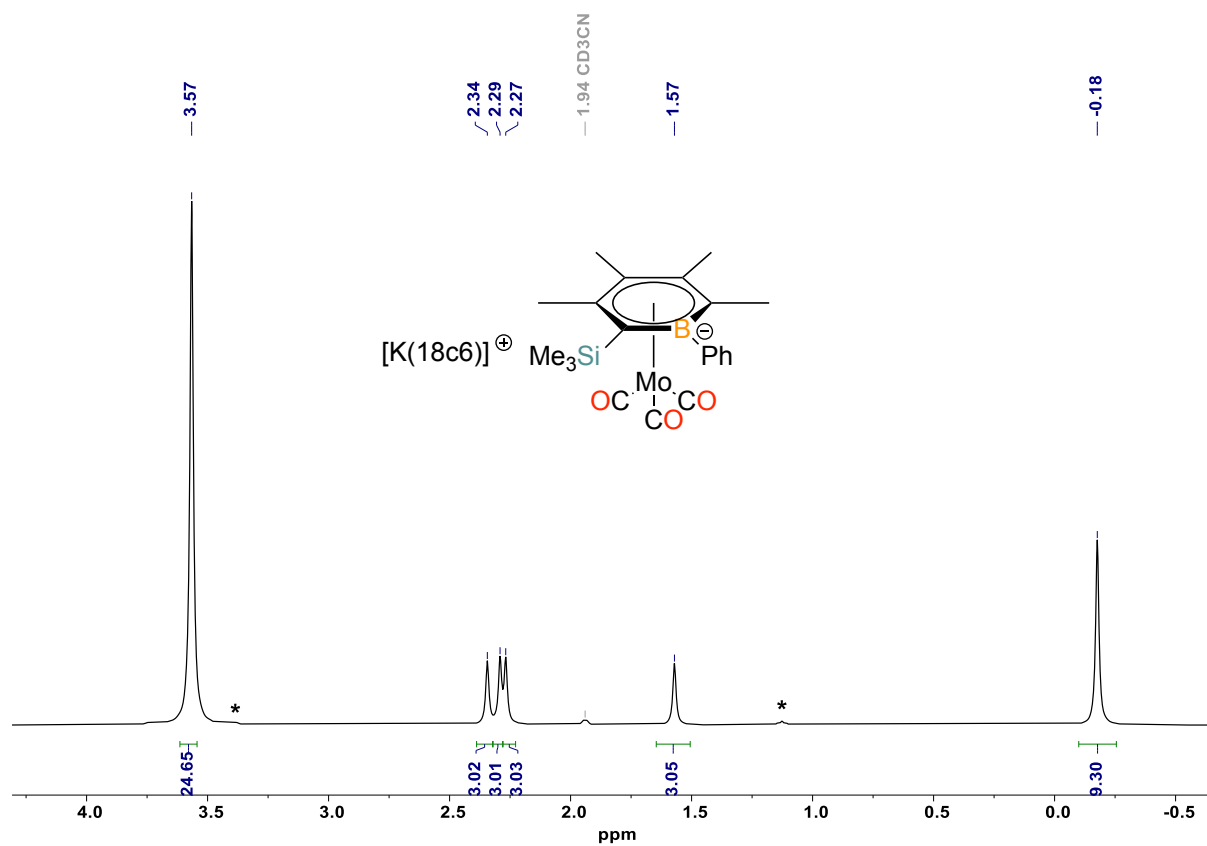

Figure S-12:  $^{13}\text{C}\{^1\text{H}\}$  NMR spectrum of **1Mo** in  $\text{CD}_3\text{CN}$  ( $^*\text{CD}_3\text{CN}$ ).

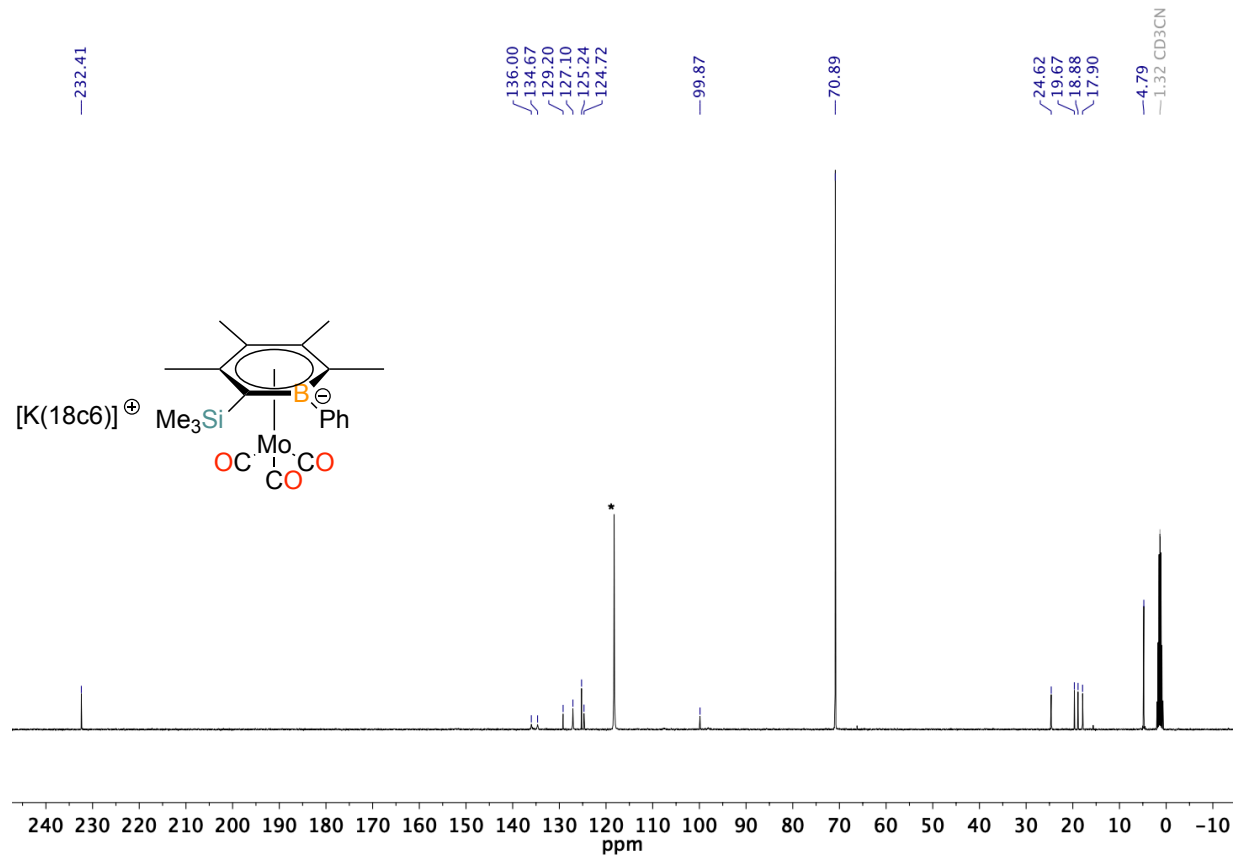

Figure S-13: Expansion of  $^{13}\text{C}\{^1\text{H}\}$  NMR spectrum of **1Mo** in  $\text{CD}_3\text{CN}$  ( $^*\text{CD}_3\text{CN}$ ).

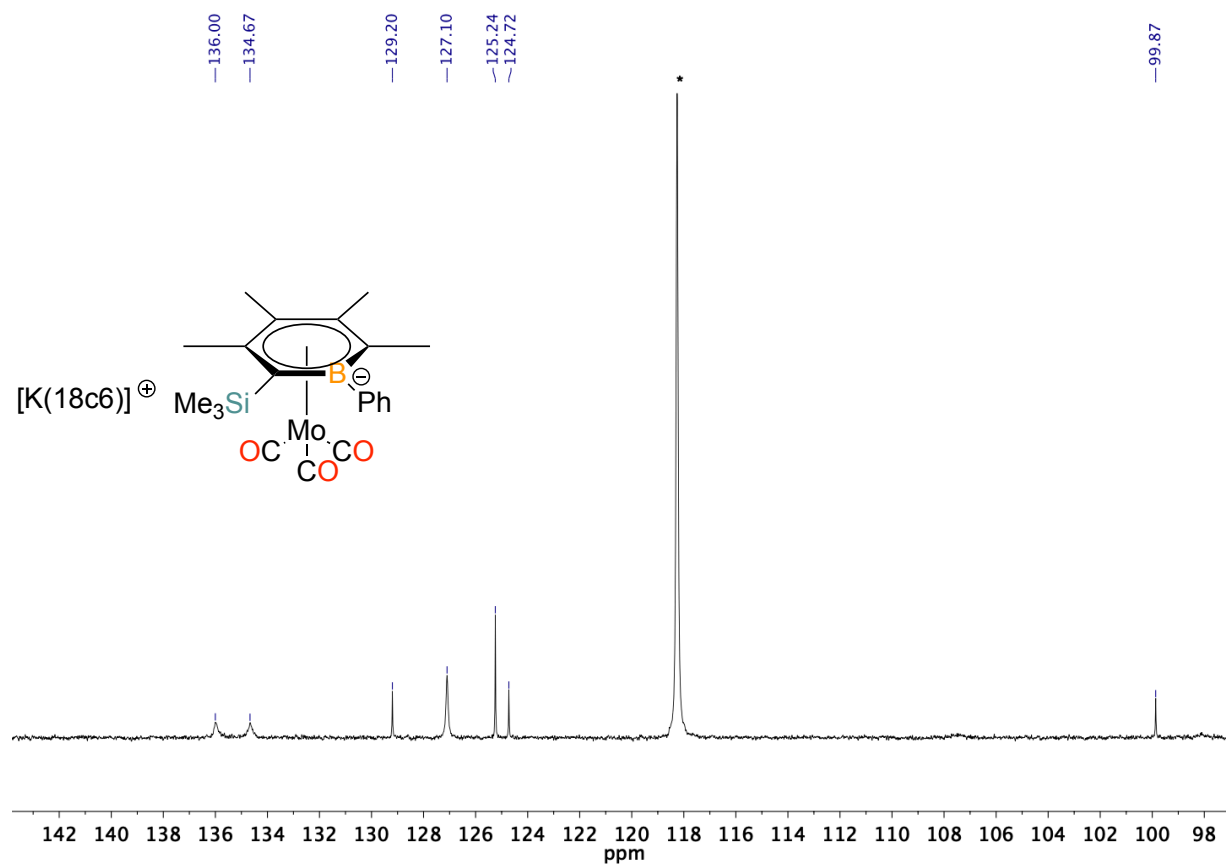

Figure S-14: Expansion of  $^{13}\text{C}\{^1\text{H}\}$  NMR spectrum of **1Mo** in  $\text{CD}_3\text{CN}$

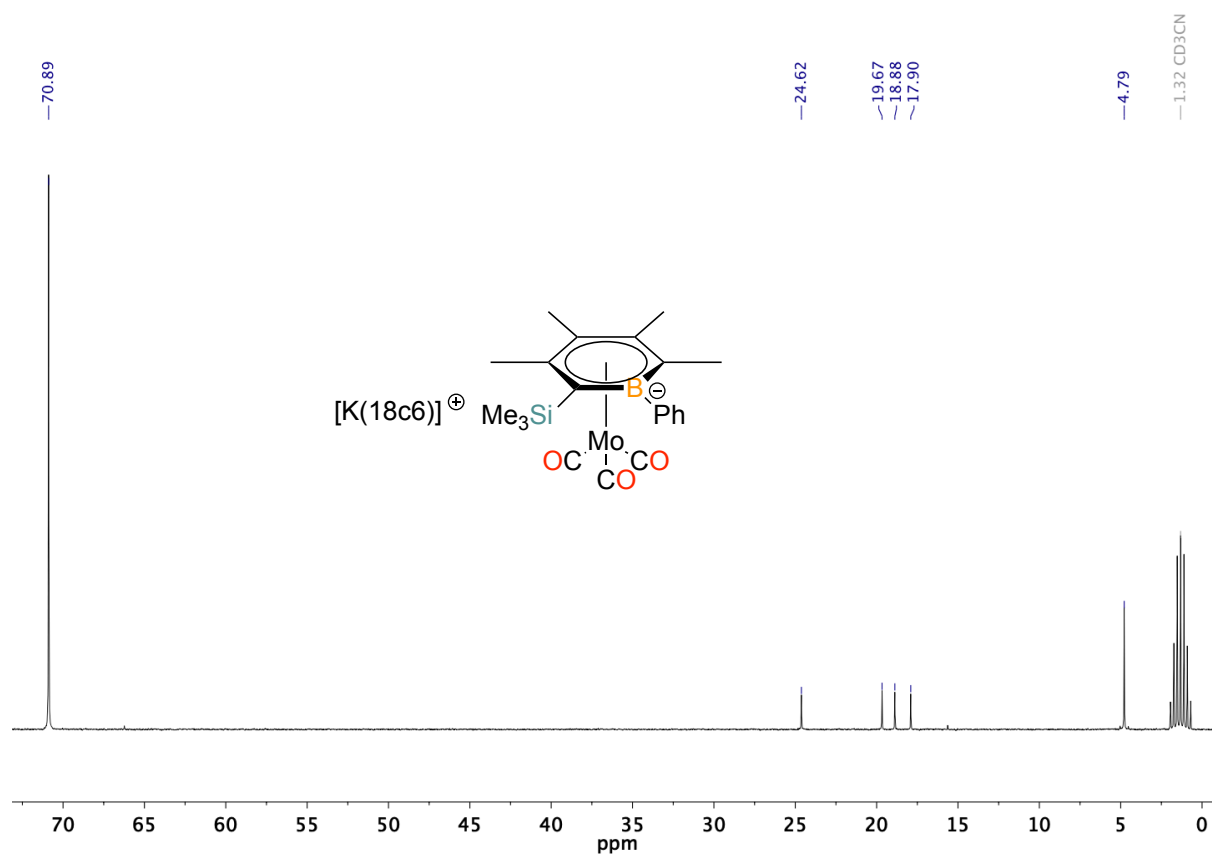



Figure S-15:  $^{11}\text{B}$  NMR spectrum of **1Mo** in  $\text{CD}_3\text{CN}$ .

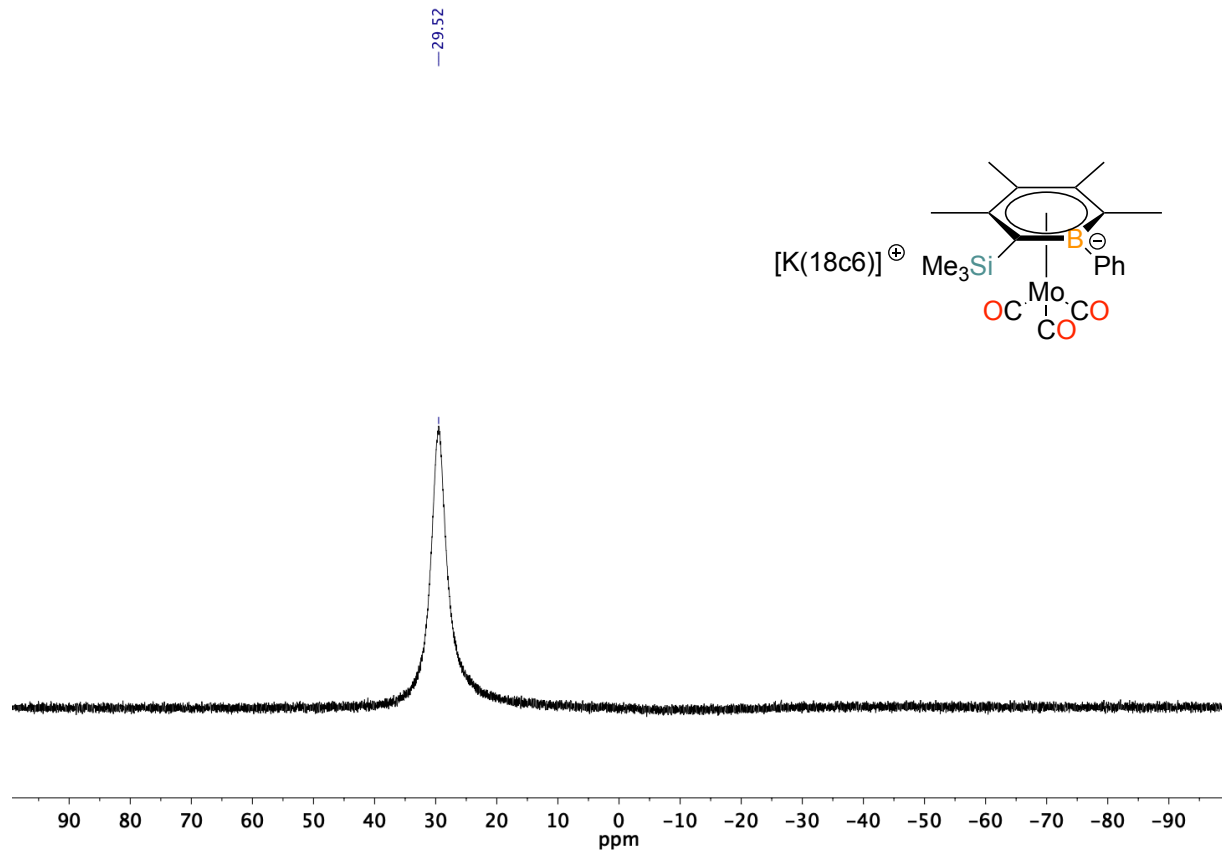

Figure S-16: FT-IR spectrum of **1Mo**.

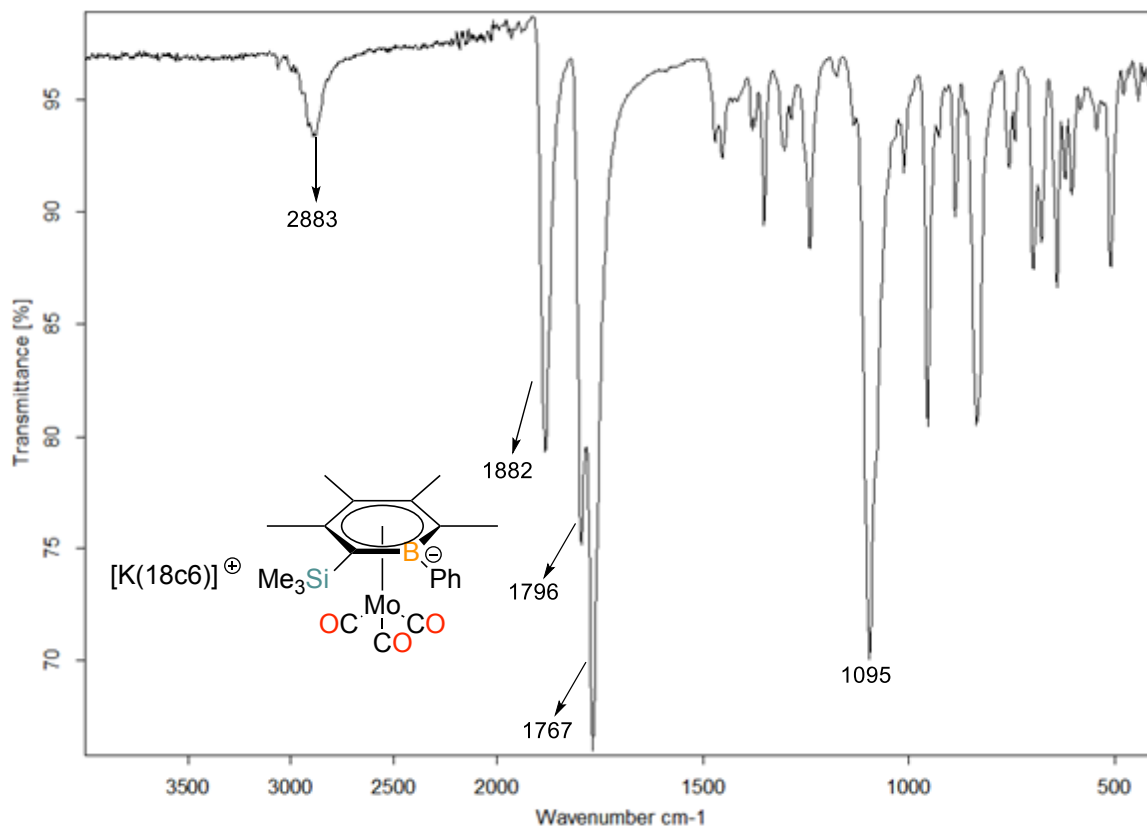

Figure S-17:  $^1\text{H}$  NMR spectrum of **1W** in  $\text{CD}_3\text{CN}$  (\*diethyl ether)

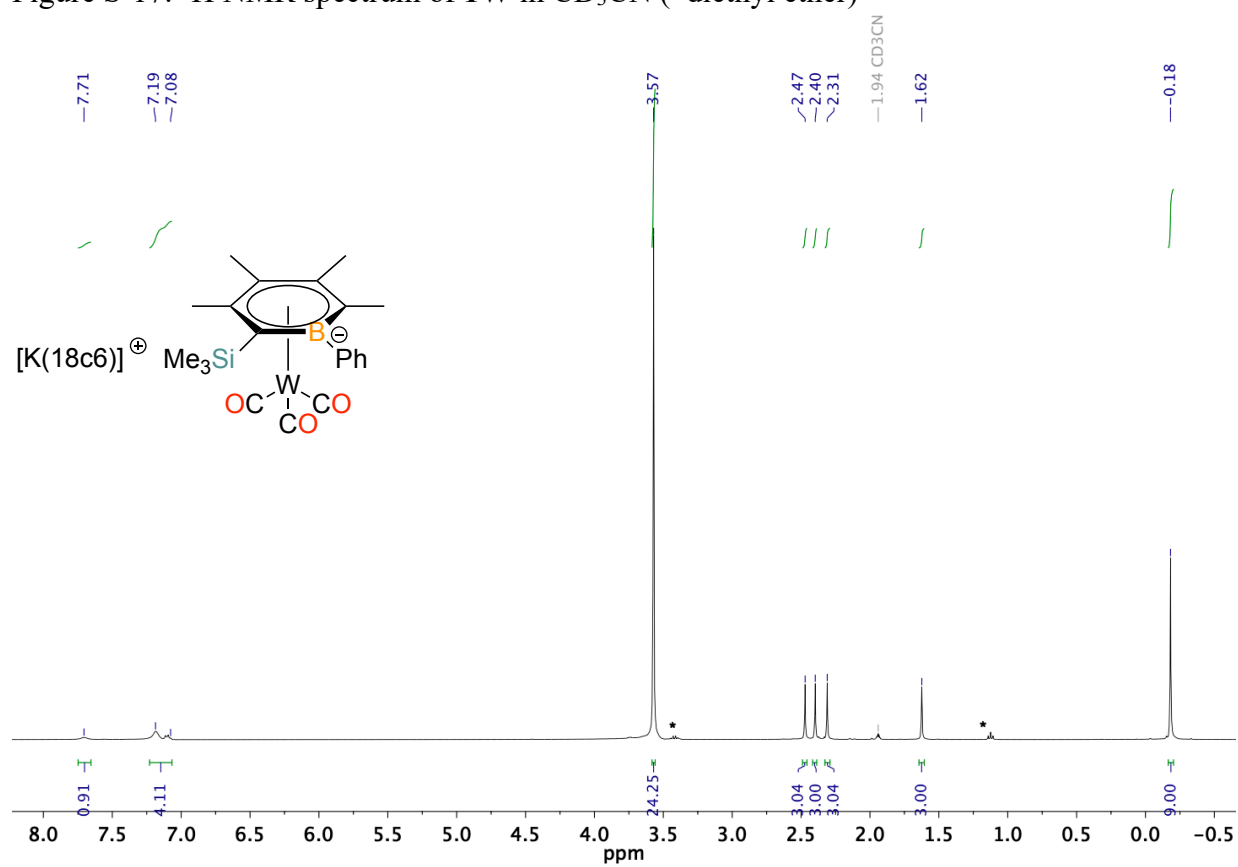

Figure S-18:  $^{13}\text{C}\{^1\text{H}\}$  NMR spectrum of **1W** in  $\text{CD}_3\text{CN}$  ( $^*\text{CD}_3\text{CN}$ ).

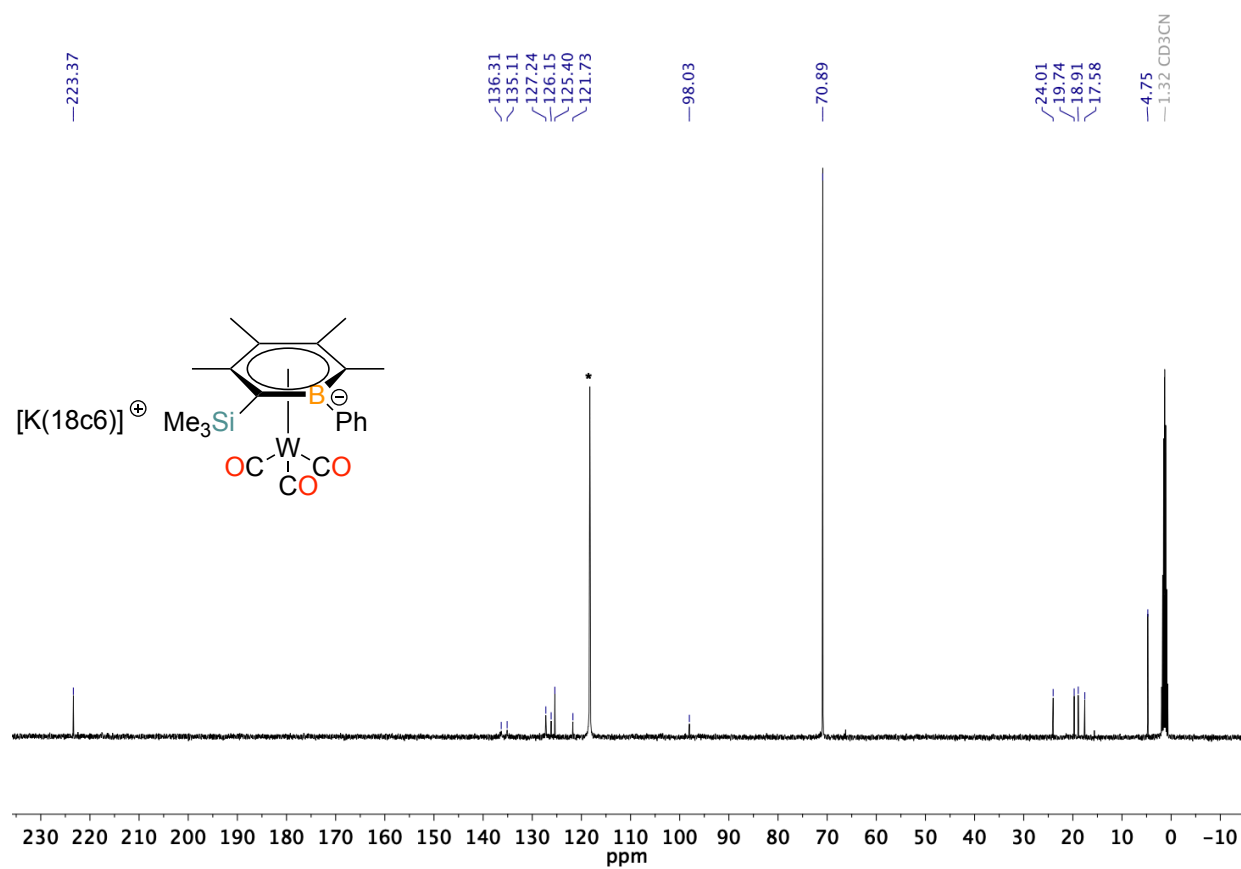

Figure S-19: Expansion of  $^{13}\text{C}\{^1\text{H}\}$  NMR spectrum of **1W** in  $\text{CD}_3\text{CN}$  ( $^*\text{CD}_3\text{CN}$ ).

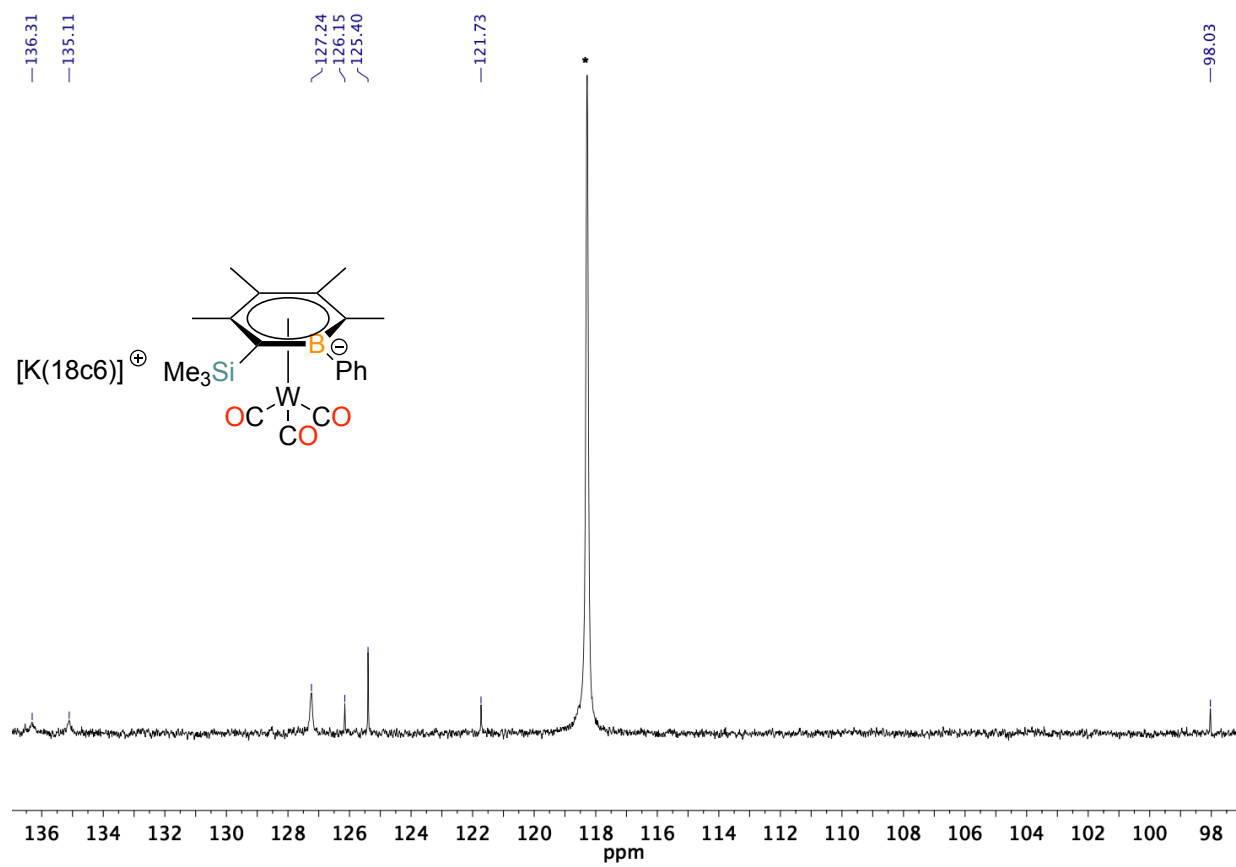

Figure S-20: Expansion of  $^{13}\text{C}\{^1\text{H}\}$  NMR spectrum of **1W** in  $\text{CD}_3\text{CN}$  (\*diethyl ether).

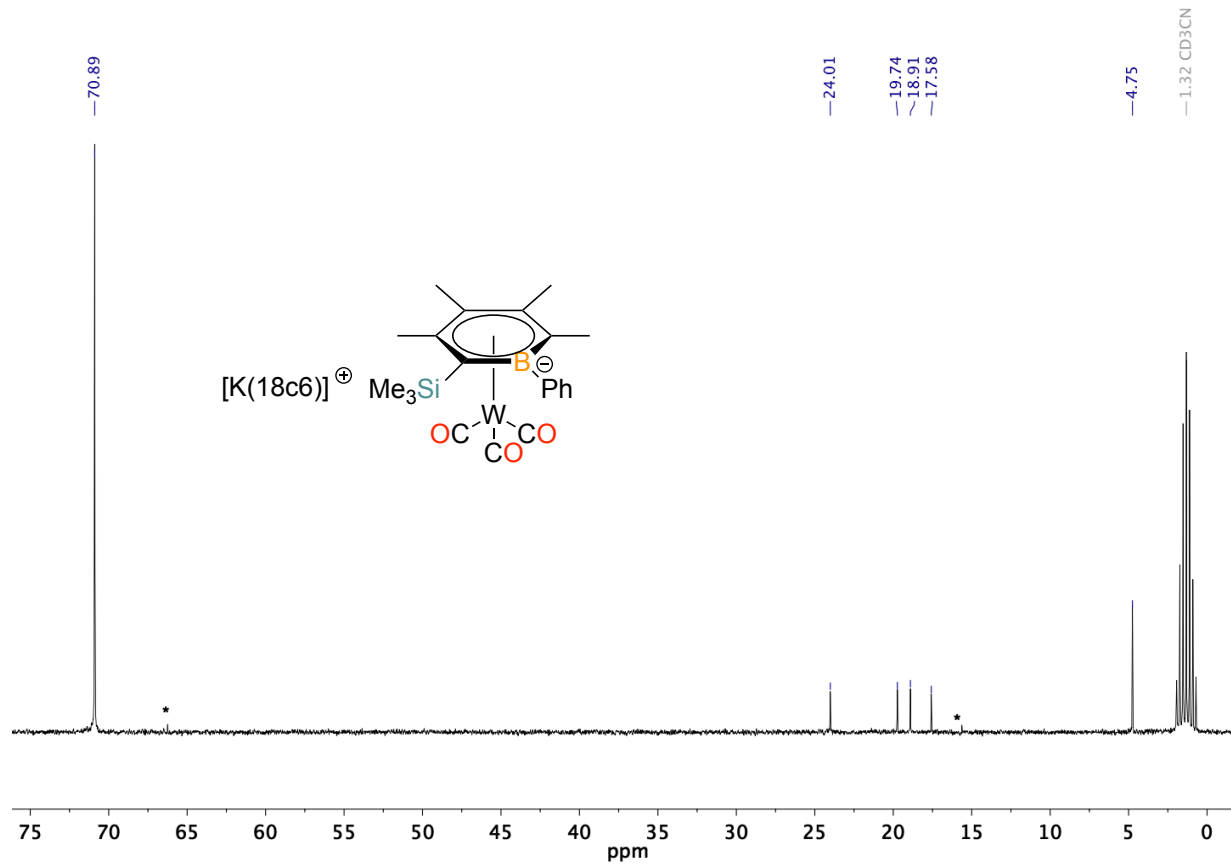

Figure S-21:  $^{11}\text{B}$  NMR spectrum of **1W** in  $\text{CD}_3\text{CN}$ .

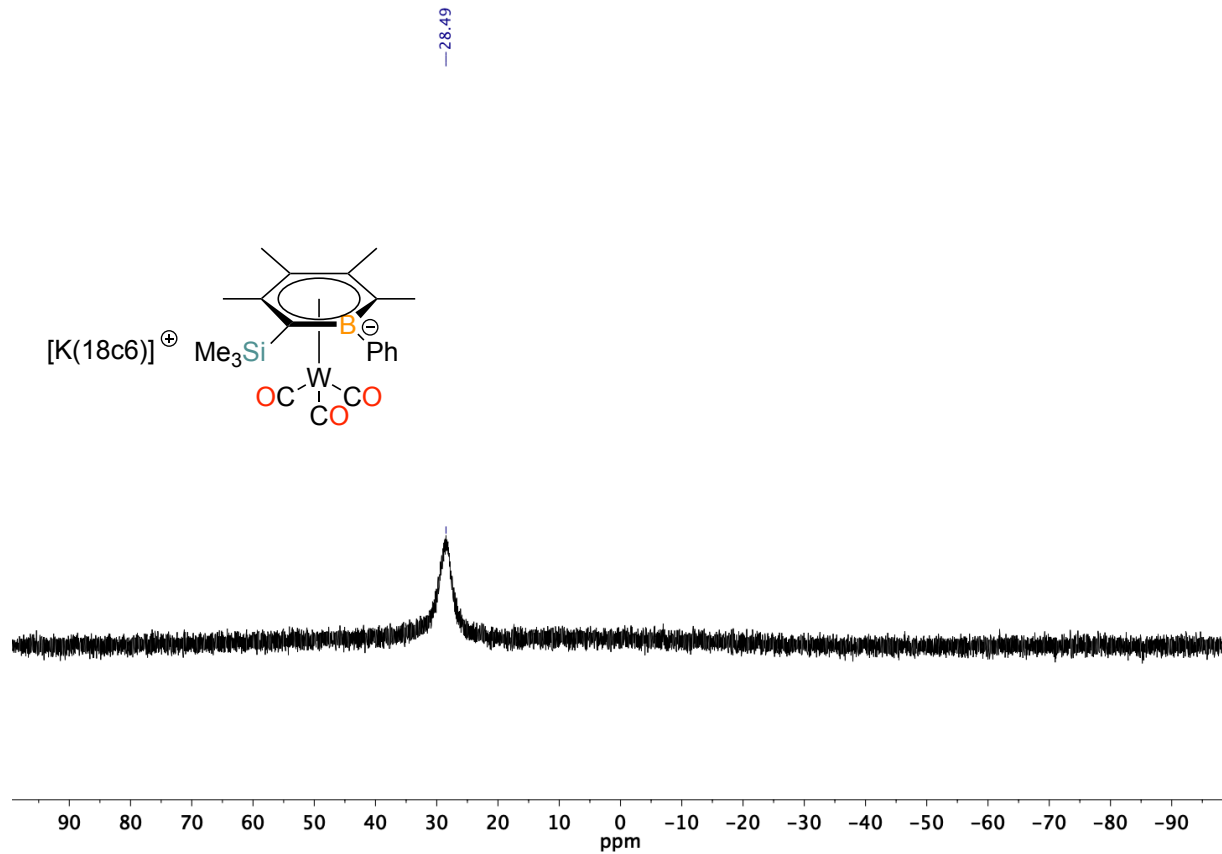

Figure S-22: FT-IR spectrum of **1W**.

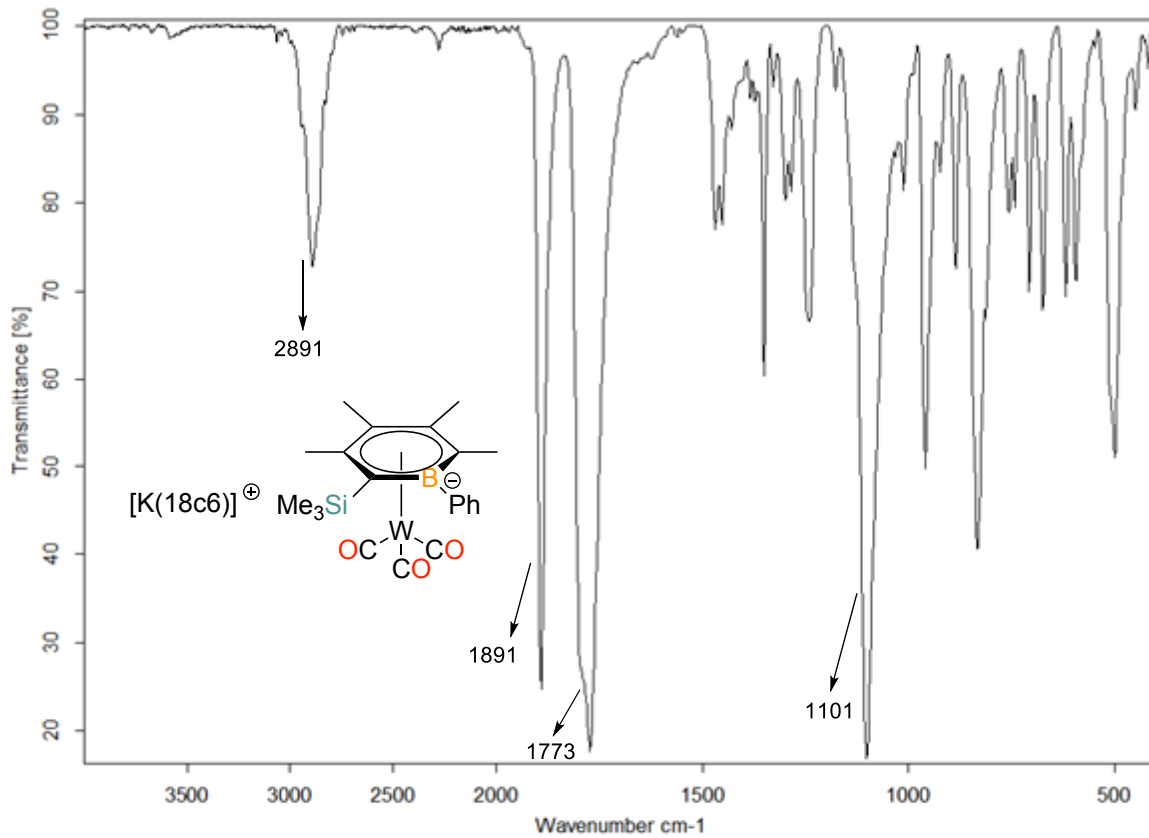



Figure S-23:  $^1\text{H}$  NMR spectrum of **2Mo** in THF- $d_8$  (\*THF- $d_8$ ).

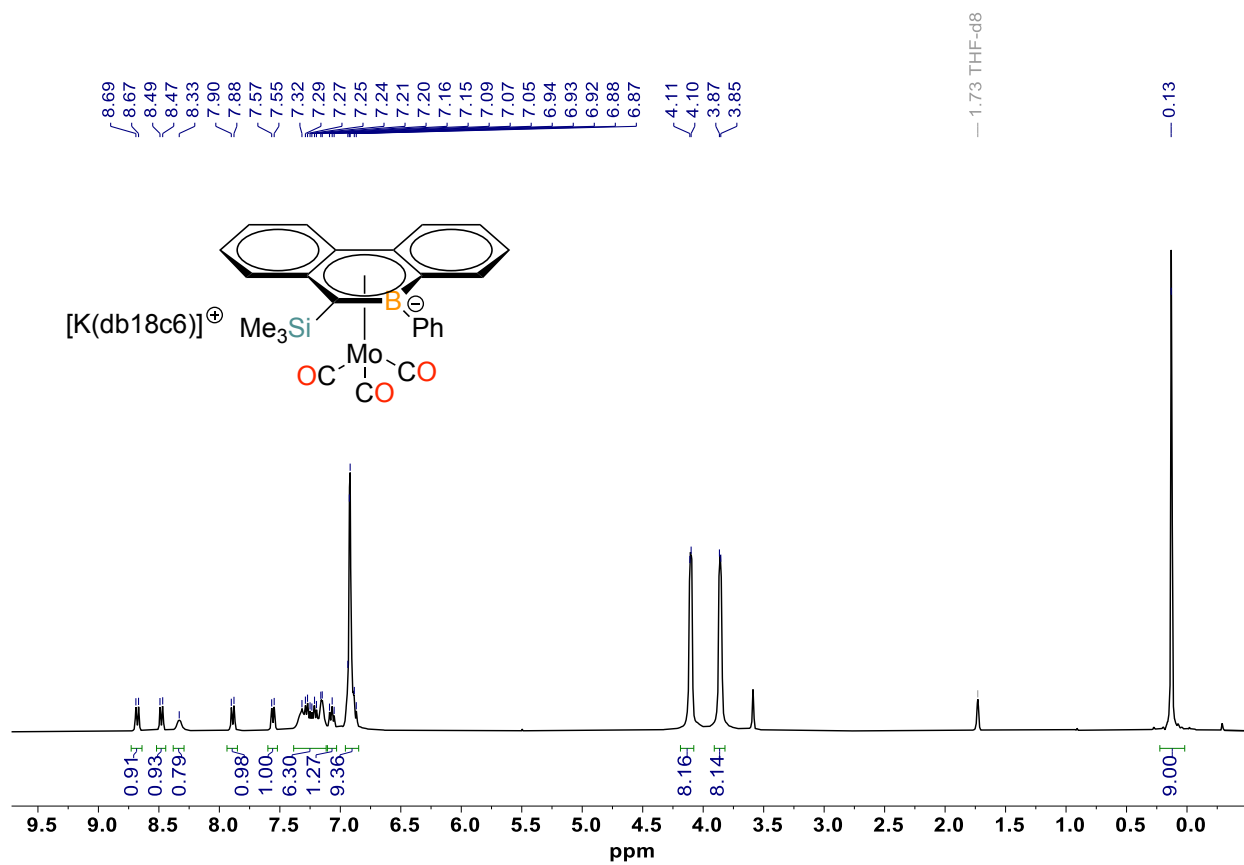

Figure S-24: Expansion of  $^1\text{H}$  NMR spectrum of **2Mo** in  $\text{THF-d}_8$

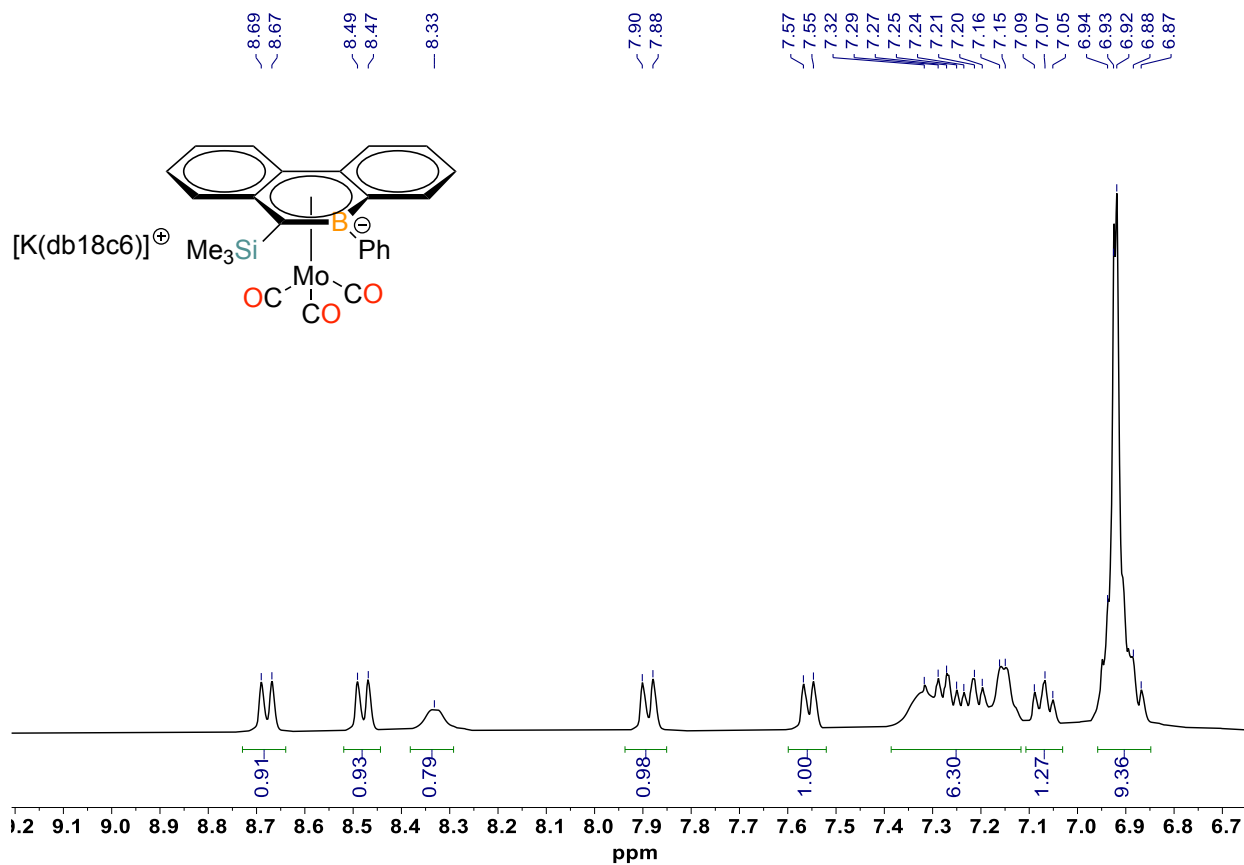

Figure S-25: Expansion of  $^1\text{H}$  NMR spectrum of **2Mo** in THF- $d_8$  (\*THF- $d_8$ ).

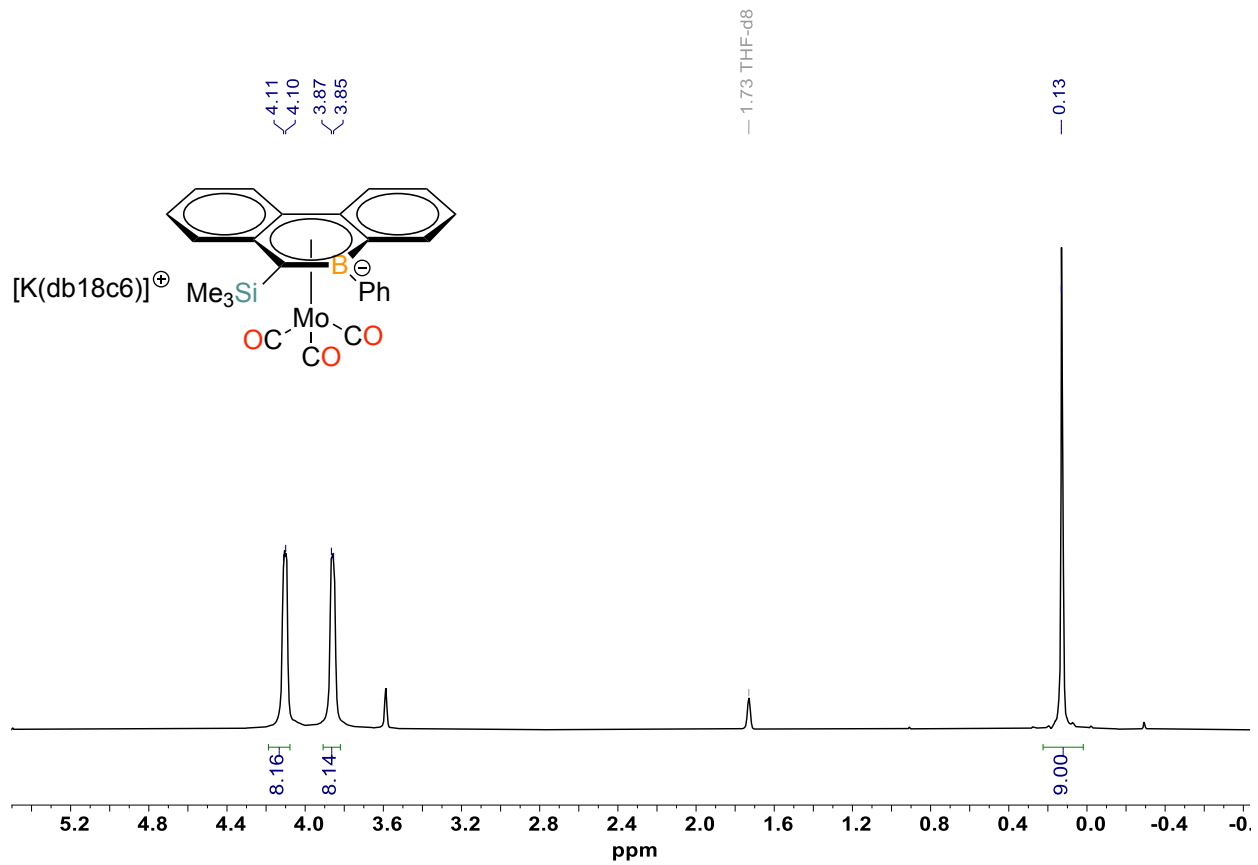

Figure S-26:  $^{13}\text{C}\{^1\text{H}\}$  NMR spectrum of **2Mo** in THF- $\text{d}_8$  (\*THF- $\text{d}_8$ ).

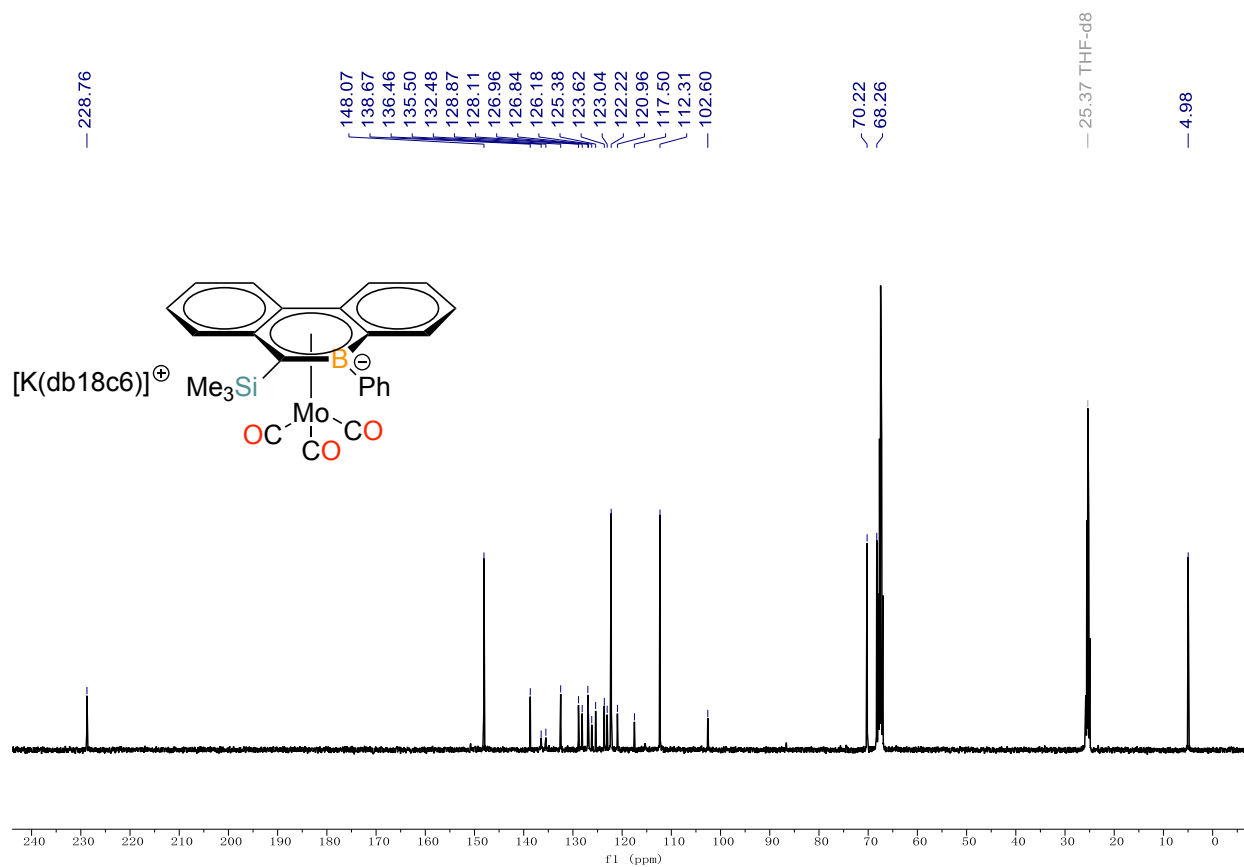

Figure S-27: Expansion of  $^{13}\text{C}\{^1\text{H}\}$  NMR spectrum of **2Mo** in THF- $d_8$ .

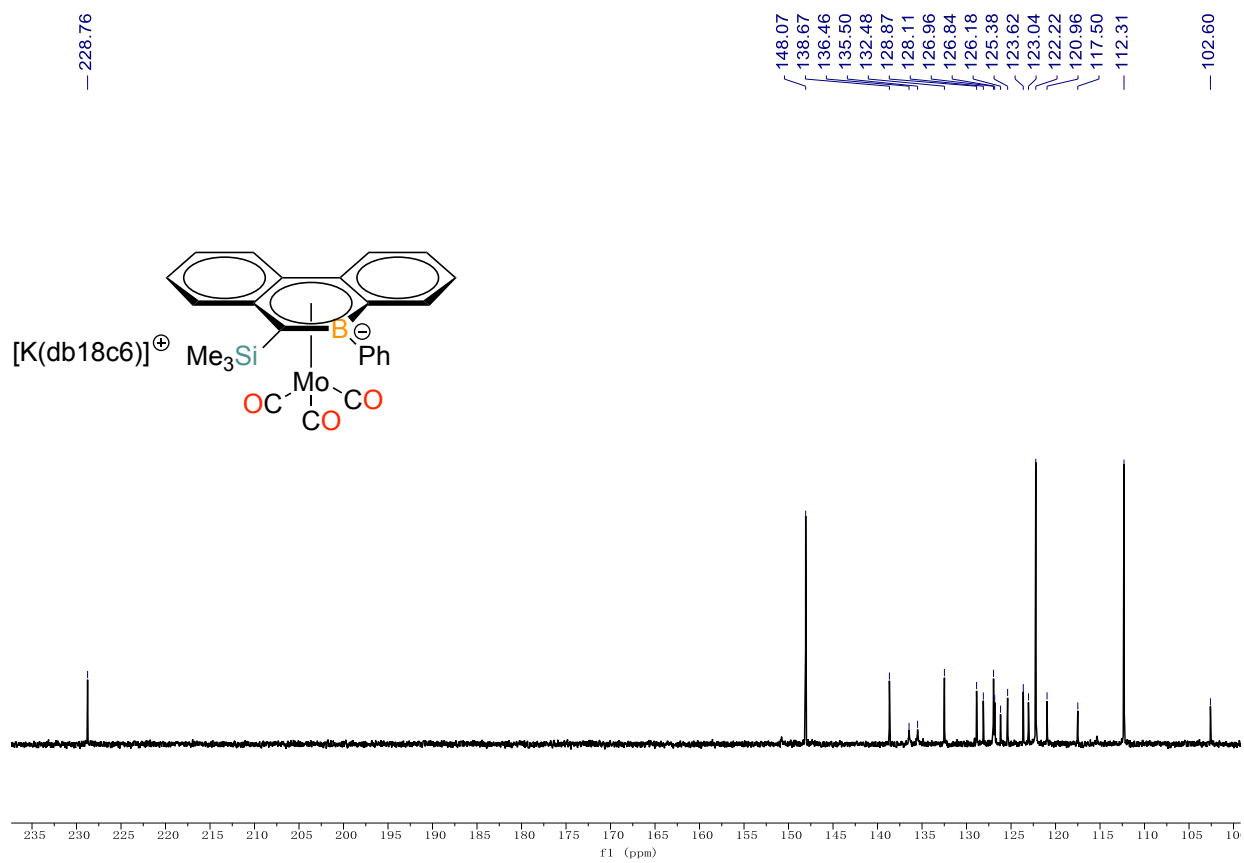

Figure S-28: Expansion of  $^{13}\text{C}\{^1\text{H}\}$  NMR spectrum of **2Mo** in THF- $d_8$  (\*THF- $d_8$ ).

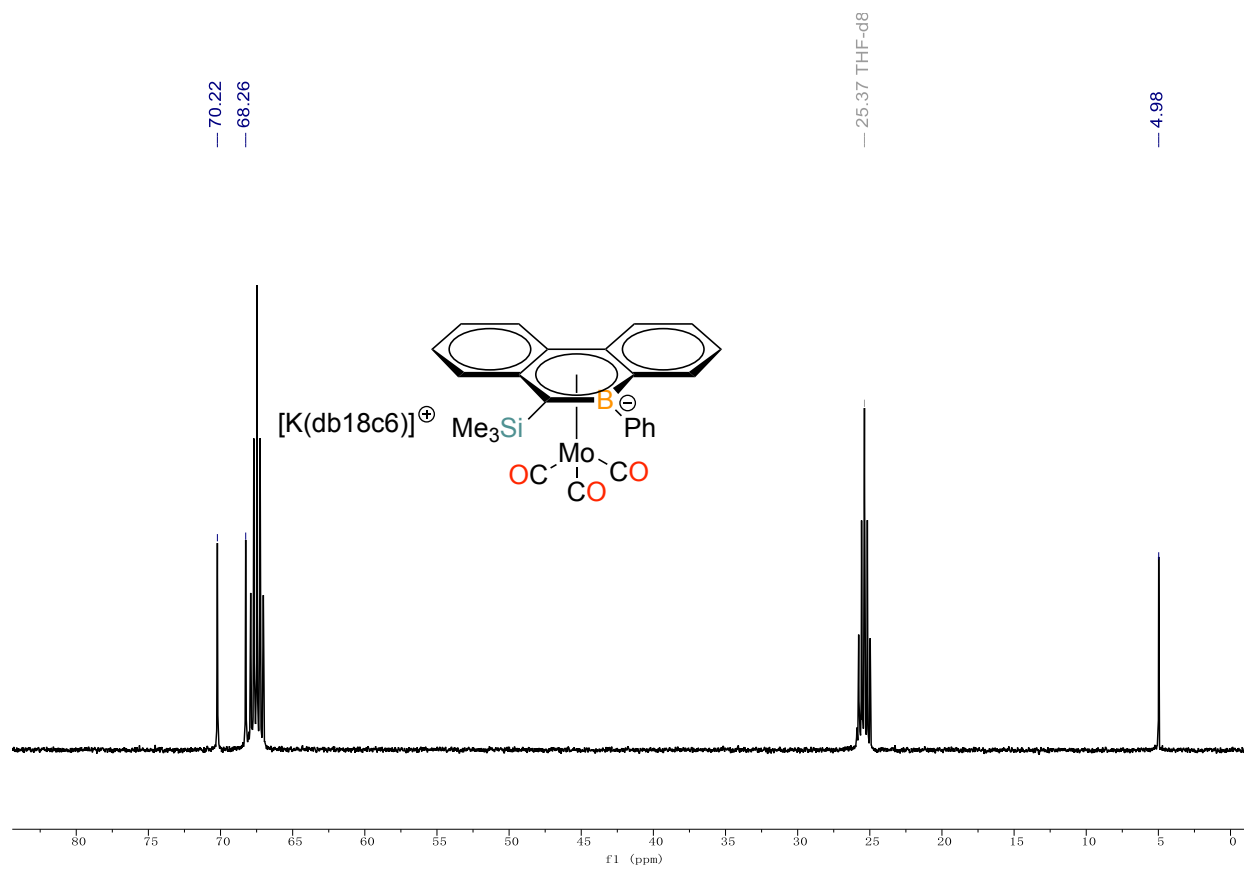

Figure S-29:  $^{11}\text{B}$  NMR spectrum of **2Mo** in THF- $d_8$ .

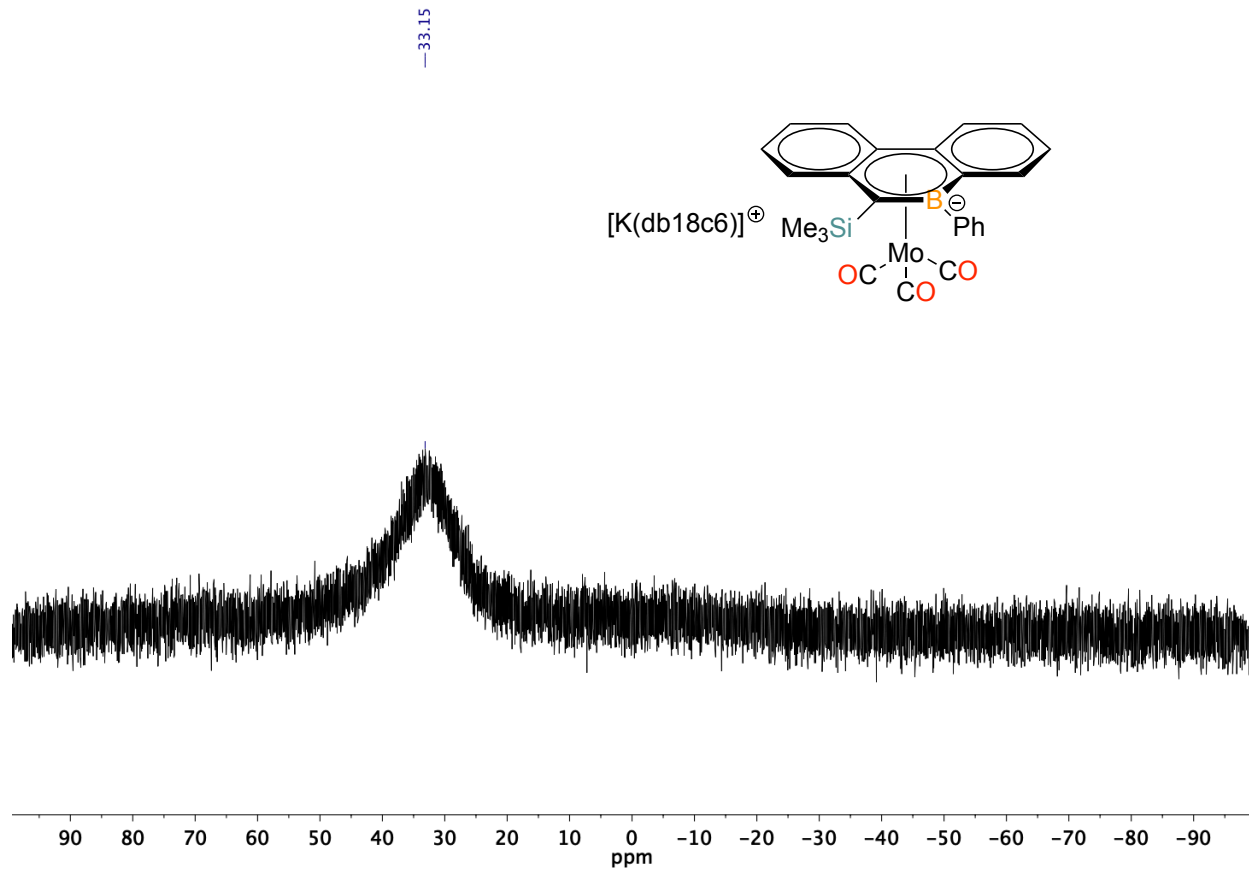

Figure S-30: FT-IR spectrum of **2Mo**.

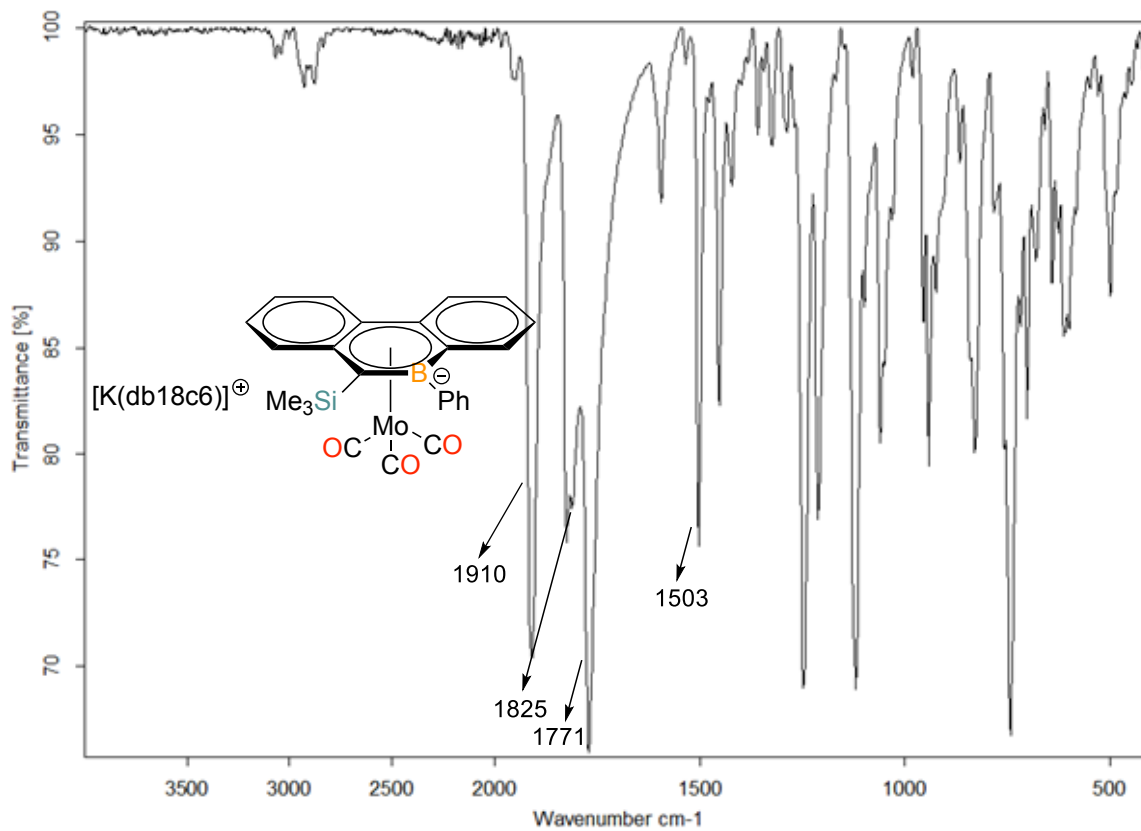



Figure S-31:  $^1\text{H}$  NMR spectrum of **2W** in THF- $d_8$  (\*THF- $d_8$ ).

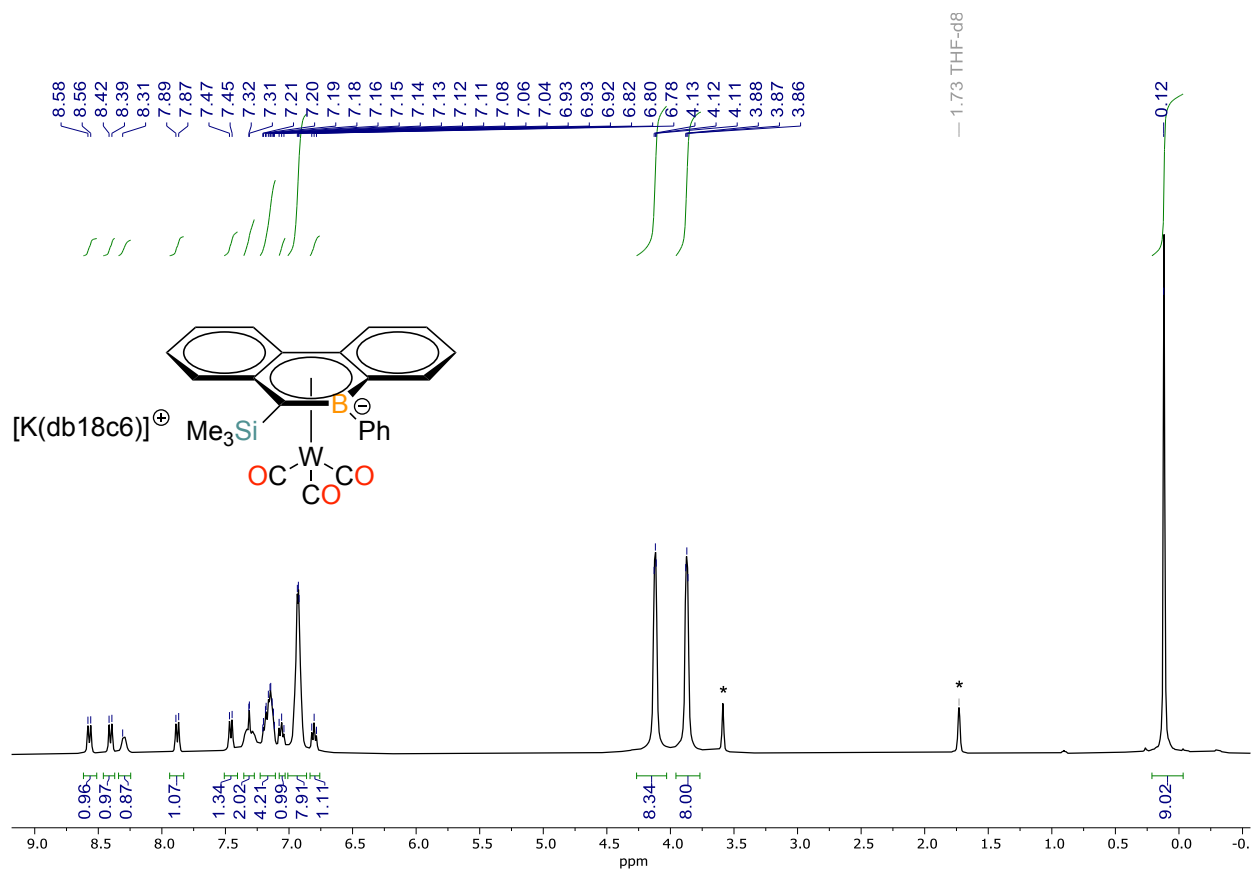

Figure S-32: Expansion of  $^1\text{H}$  NMR spectrum of **2W** in THF- $d_8$  (\* benzene).

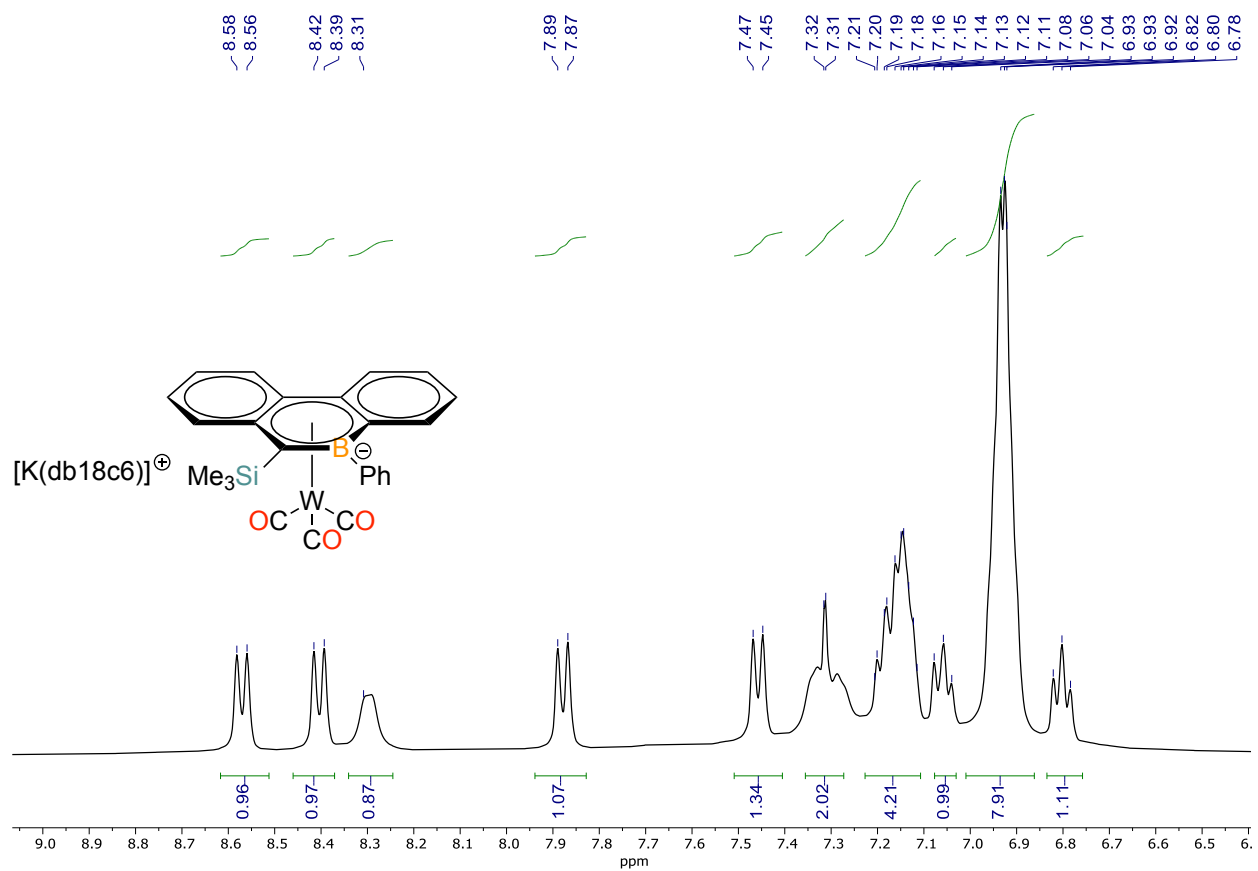

Figure S-33: Expansion of  $^1\text{H}$  NMR spectrum of **2W** in THF- $\text{d}_8$  (\*THF- $\text{d}_8$ ).

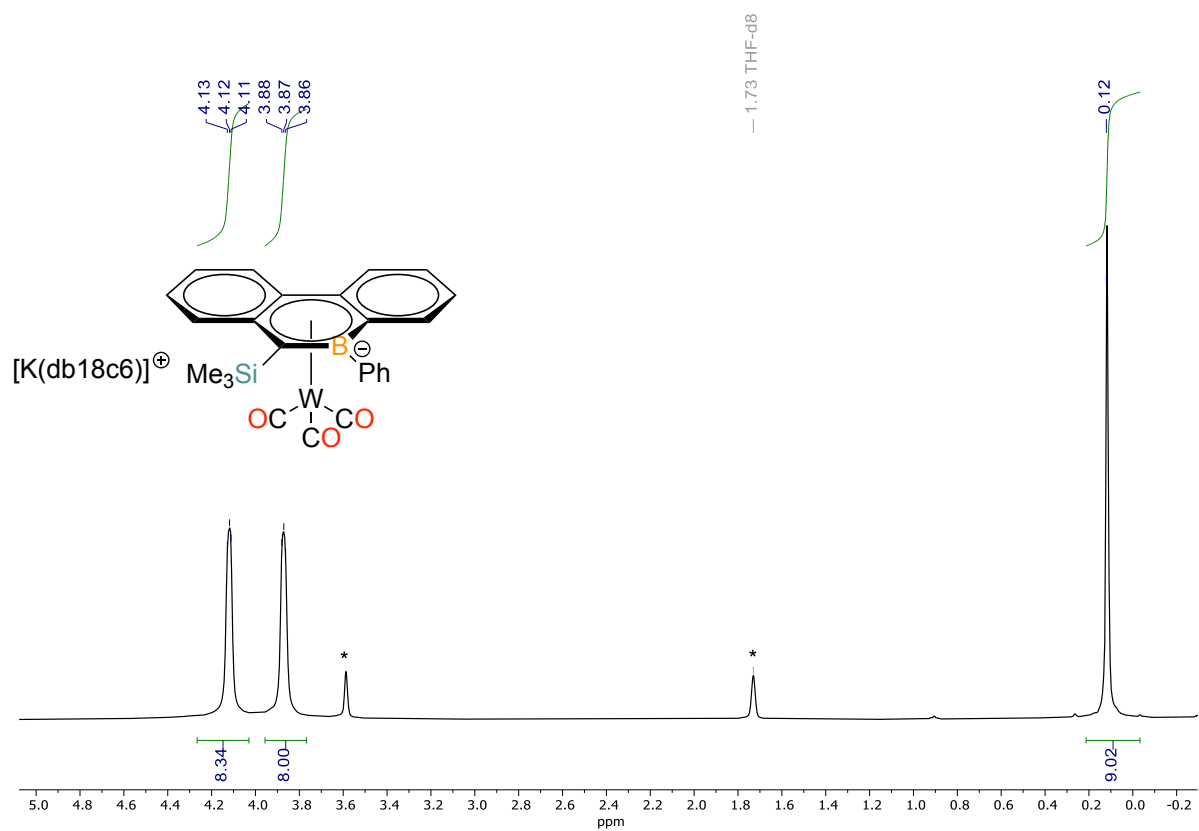

Figure S-34:  $^{13}\text{C}\{^1\text{H}\}$  NMR spectrum of **2W** in THF- $\text{d}_8$  (\*THF- $\text{d}_8$ ).

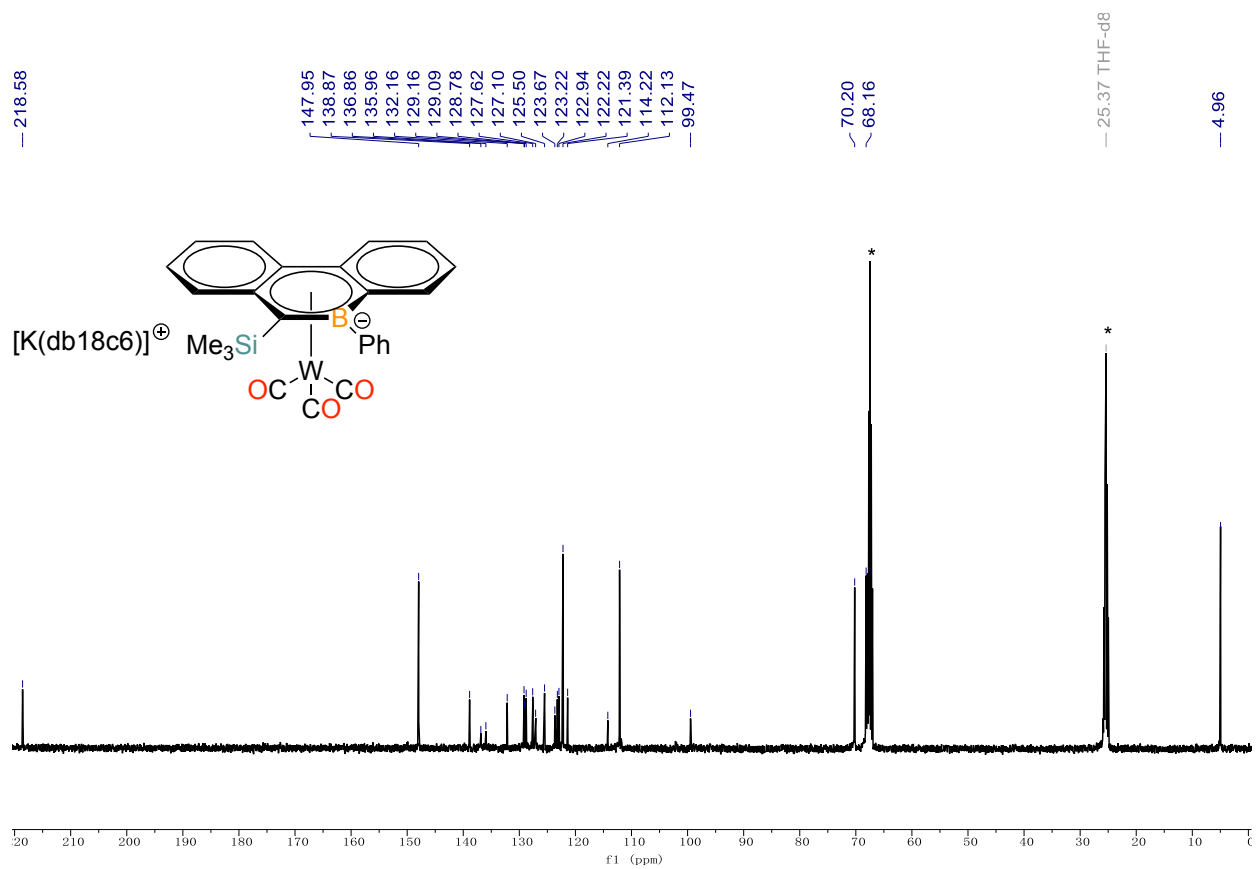

Figure S-35: Expansion of  $^{13}\text{C}\{^1\text{H}\}$  NMR spectrum of **2W** in THF- $d_8$ .

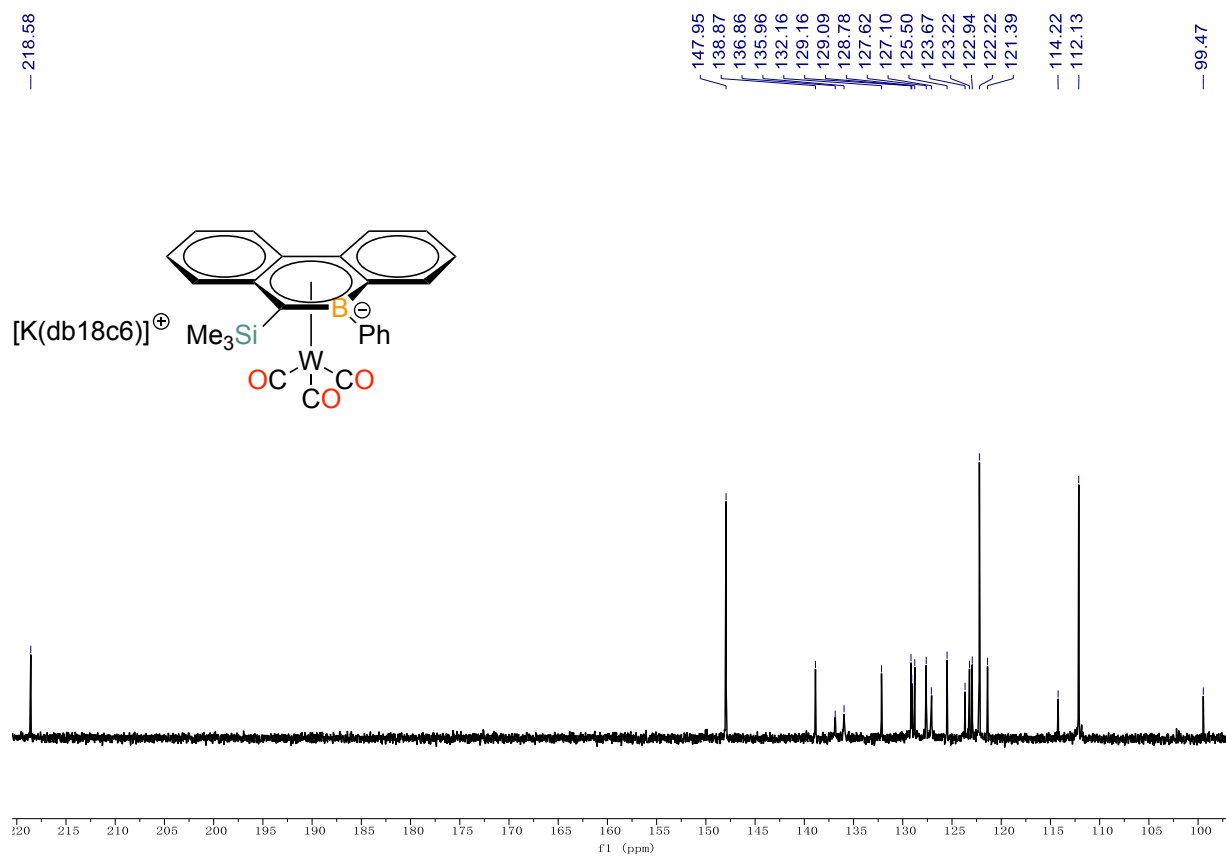

Figure S-36: Expansion of  $^{13}\text{C}\{^1\text{H}\}$  NMR spectrum of **2W** in THF- $\text{d}_8$  (\*THF- $\text{d}_8$ ).

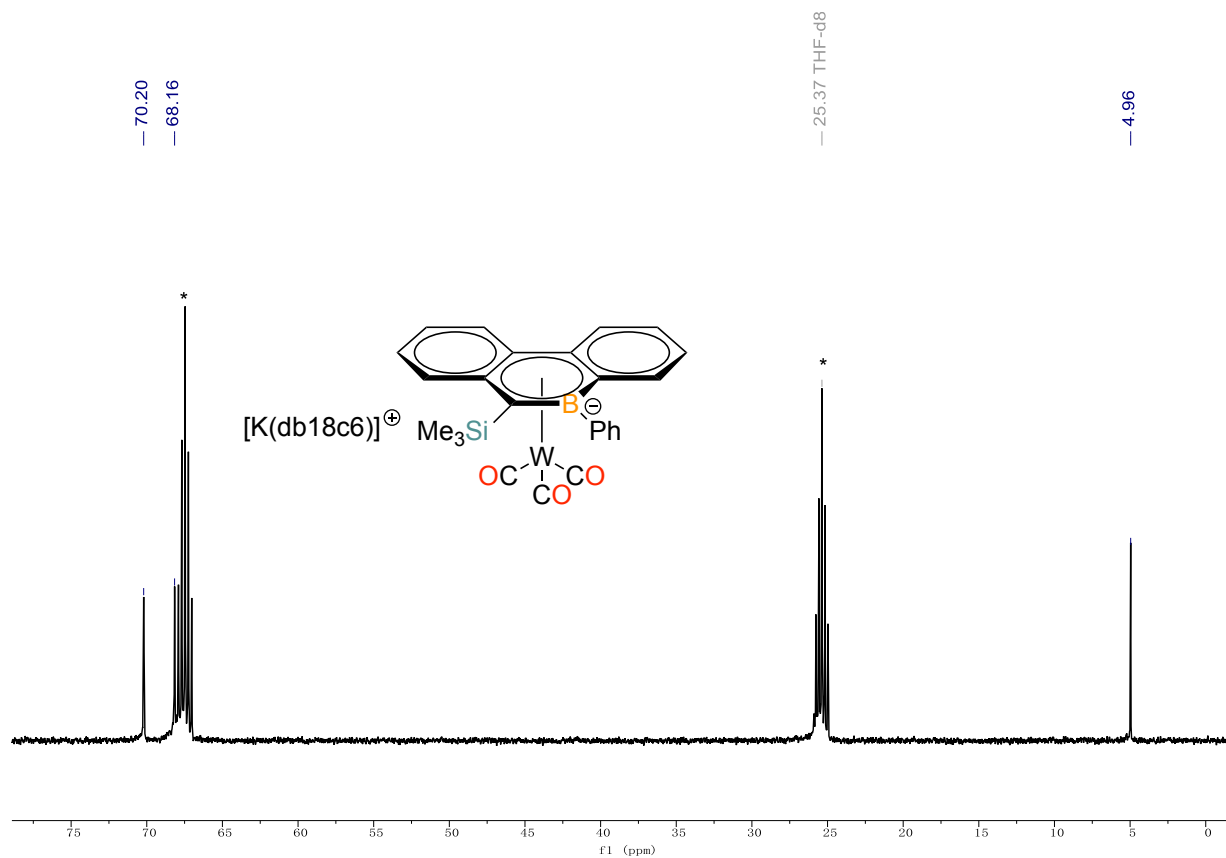

Figure S-37:  $^{11}\text{B}$  NMR spectrum of **2W** in THF- $d_8$ .

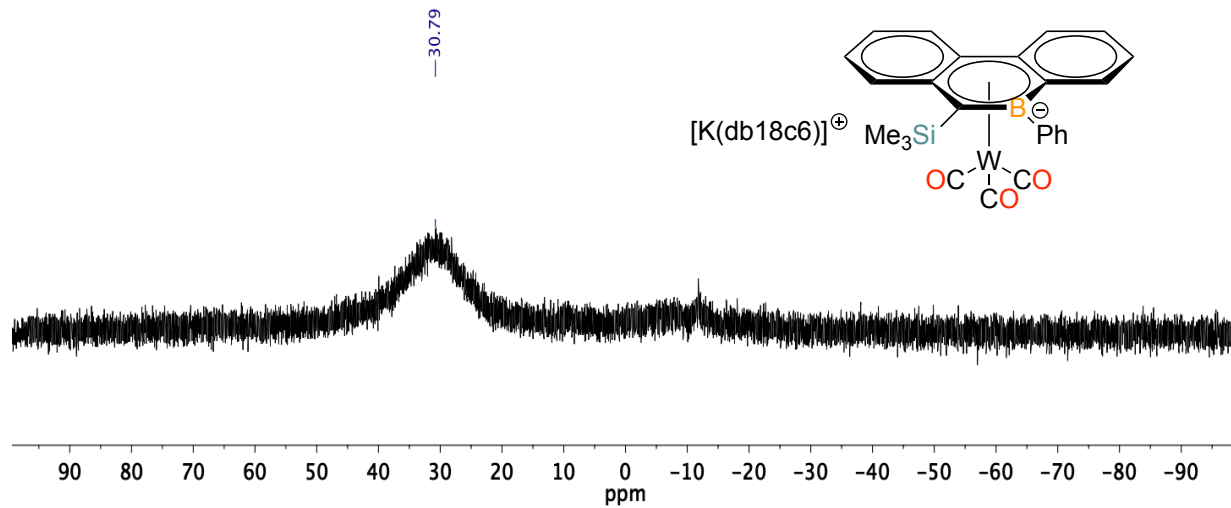

Figure S-38: FT-IR spectrum of **2W**.

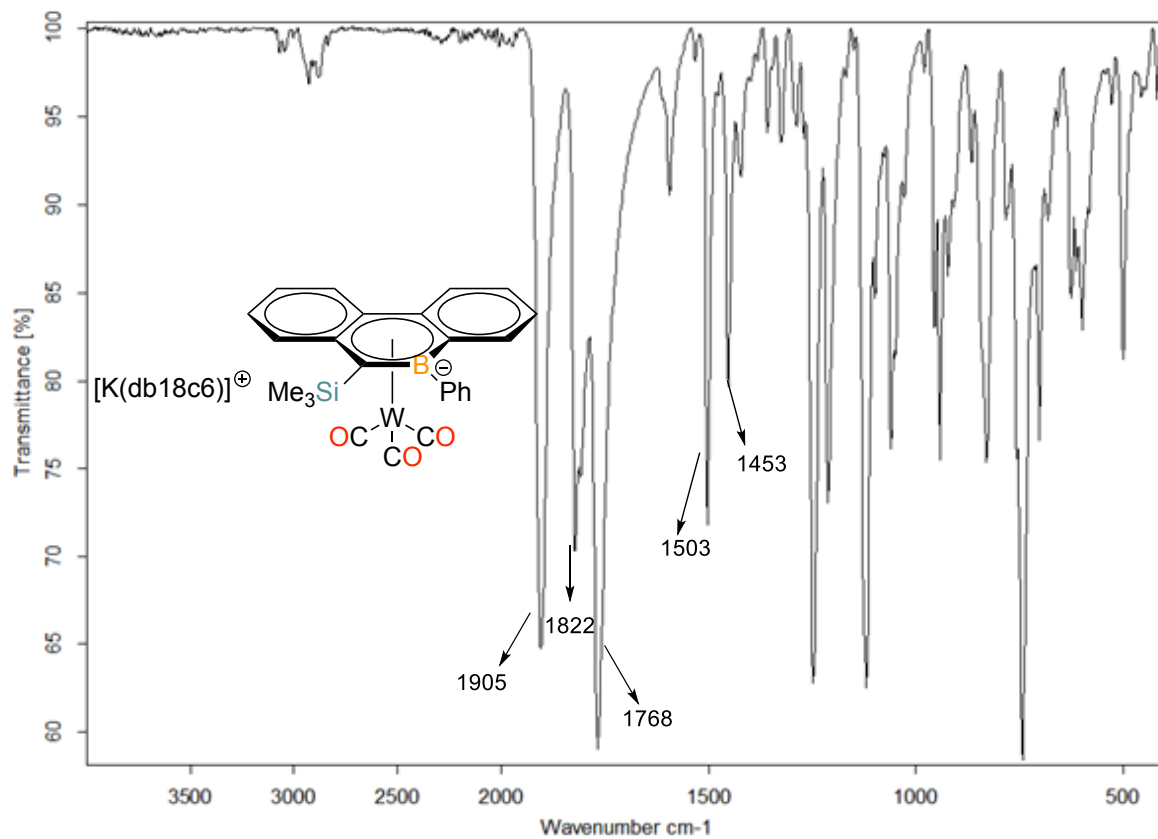



Figure S-39:  $^1\text{H}$  NMR spectrum of **1Rh** in  $\text{C}_6\text{D}_6$ .

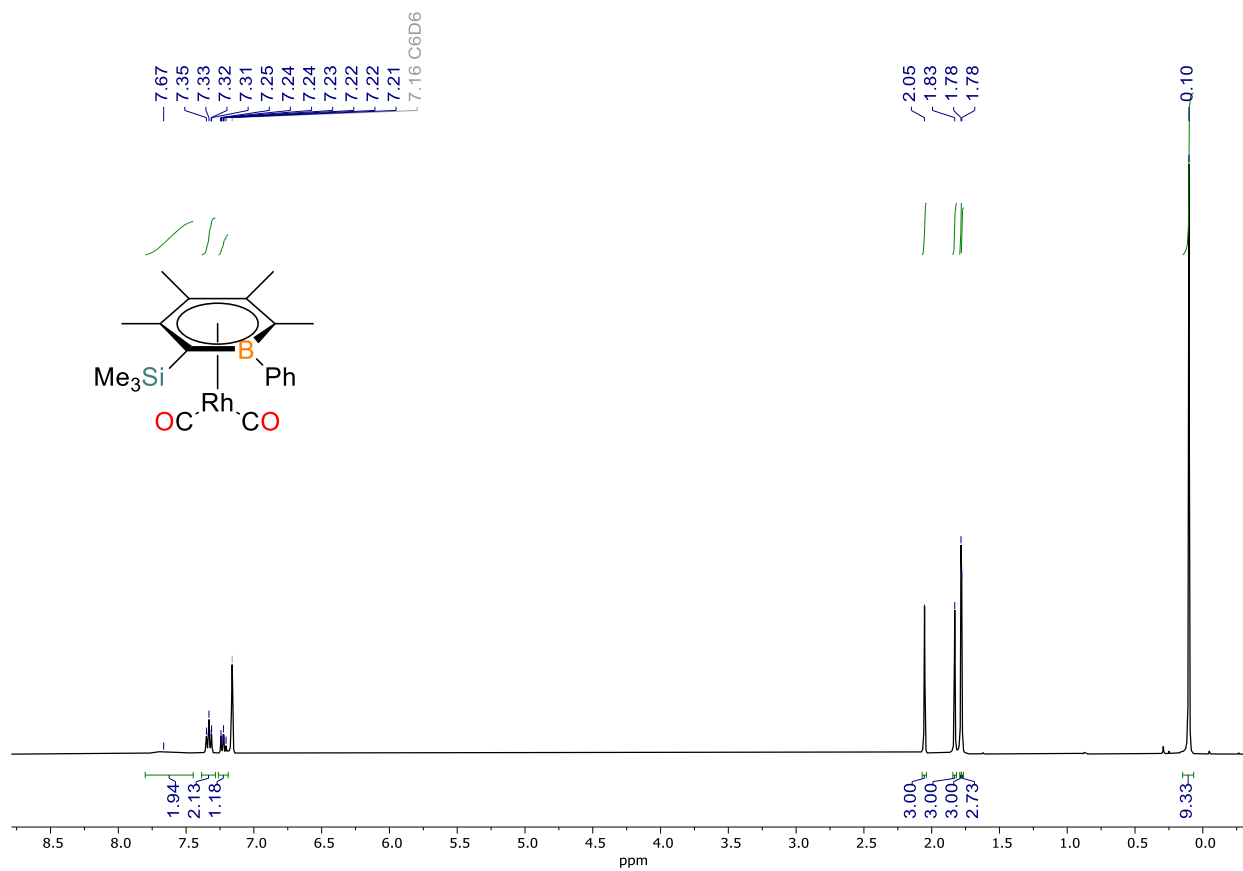

Figure S-40: Expansion of  $^1\text{H}$  NMR spectrum of **1Rh** in  $\text{C}_6\text{D}_6$ .

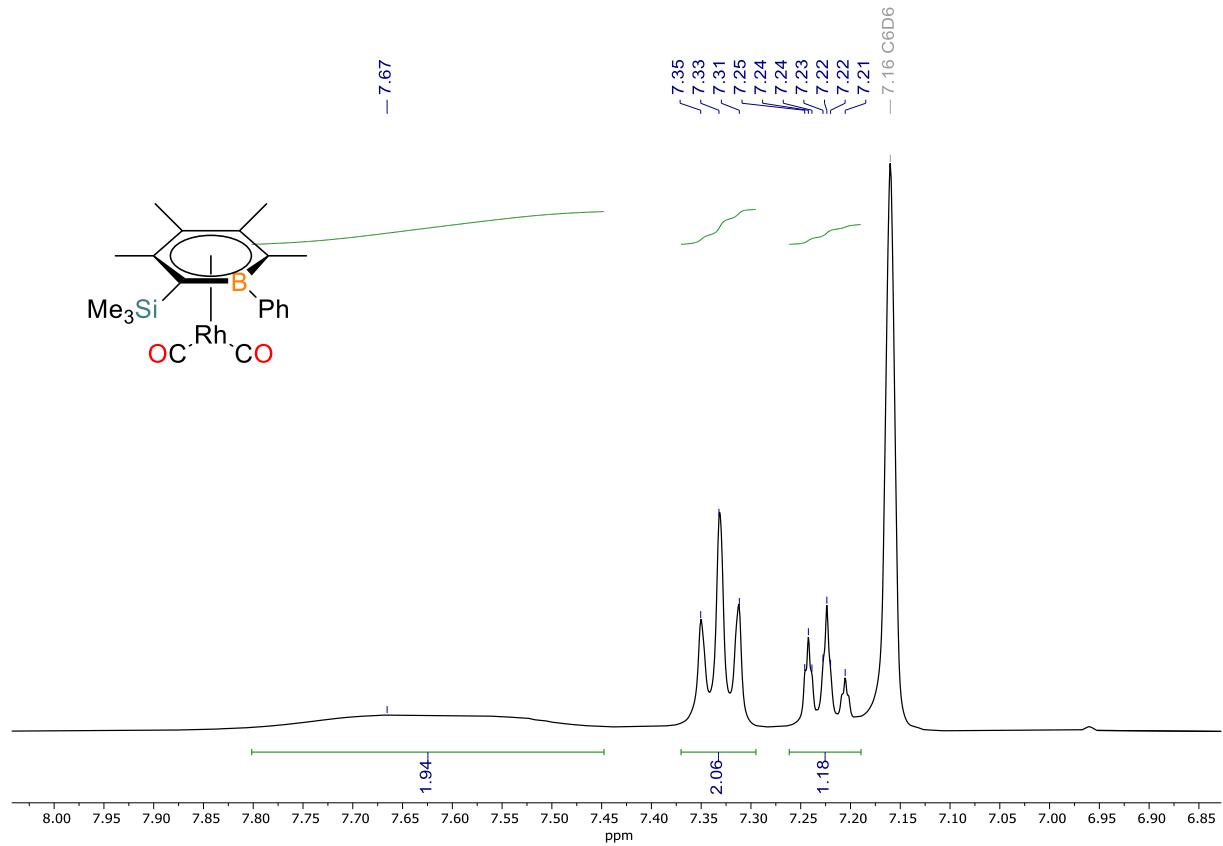

Figure S-41: Expansion of  $^1\text{H}$  NMR spectrum of **1Rh** in  $\text{C}_6\text{D}_6$ .

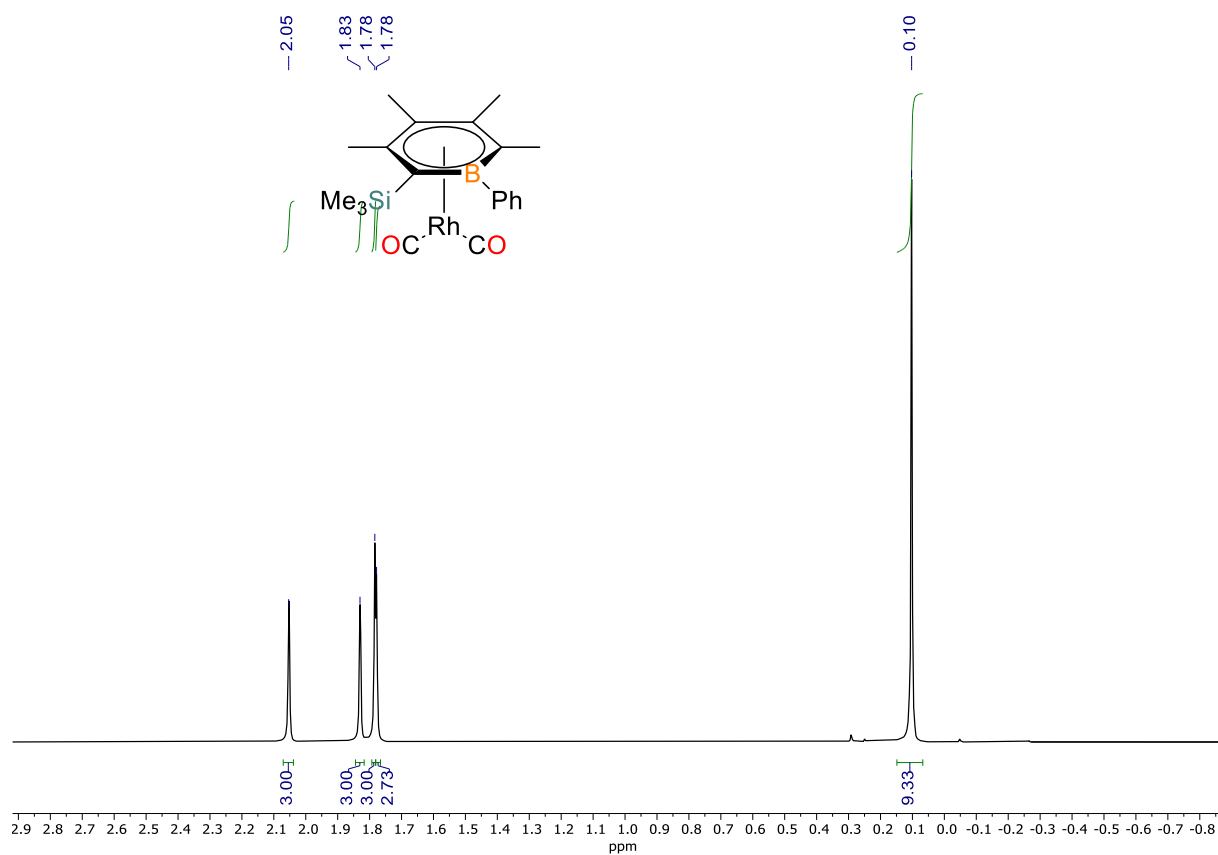

Figure S-42:  $^1\text{H}$  VT-NMR spectra of **1Rh** in  $\text{C}_6\text{D}_6$ .

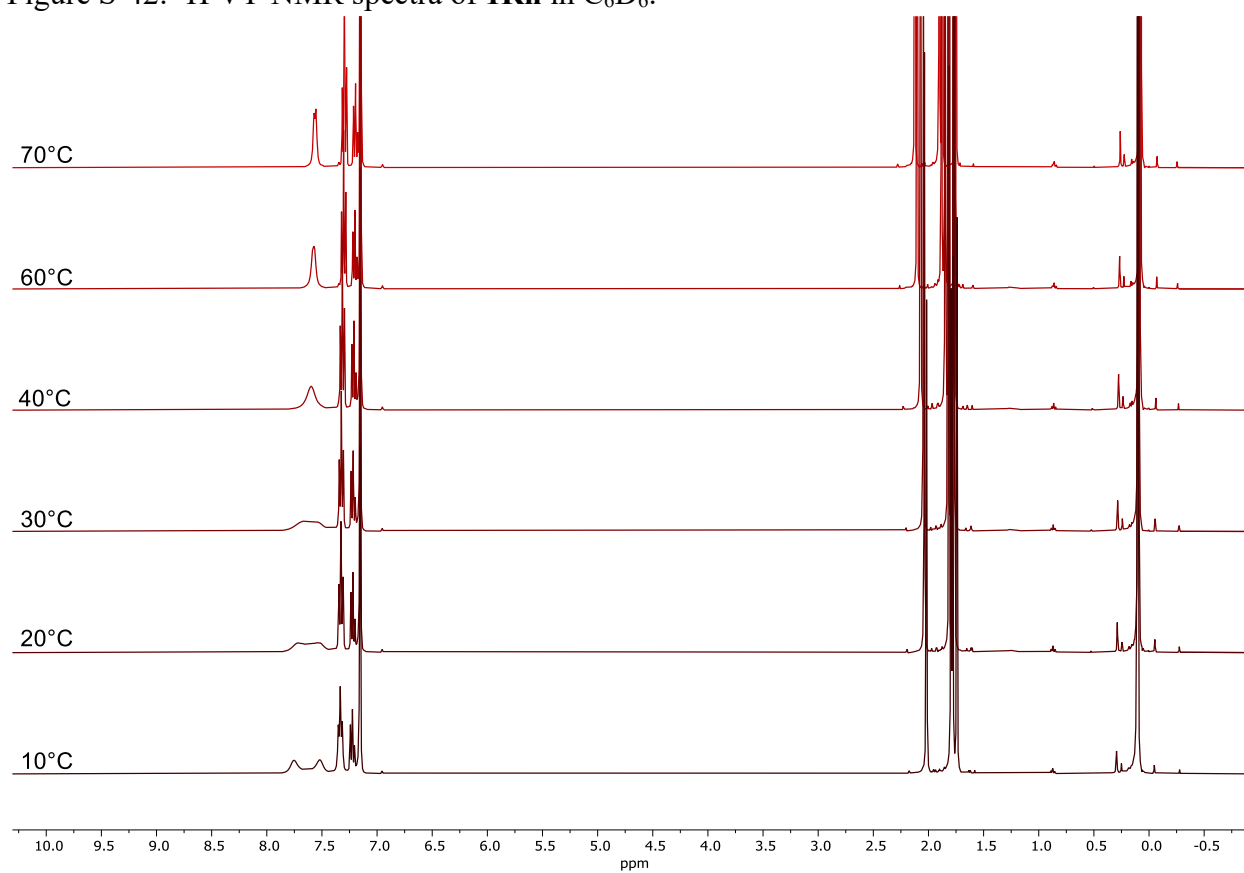

Figure S-43:  $^{13}\text{C}\{^1\text{H}\}$  NMR spectrum of **1Rh** in  $\text{C}_6\text{D}_6$ .

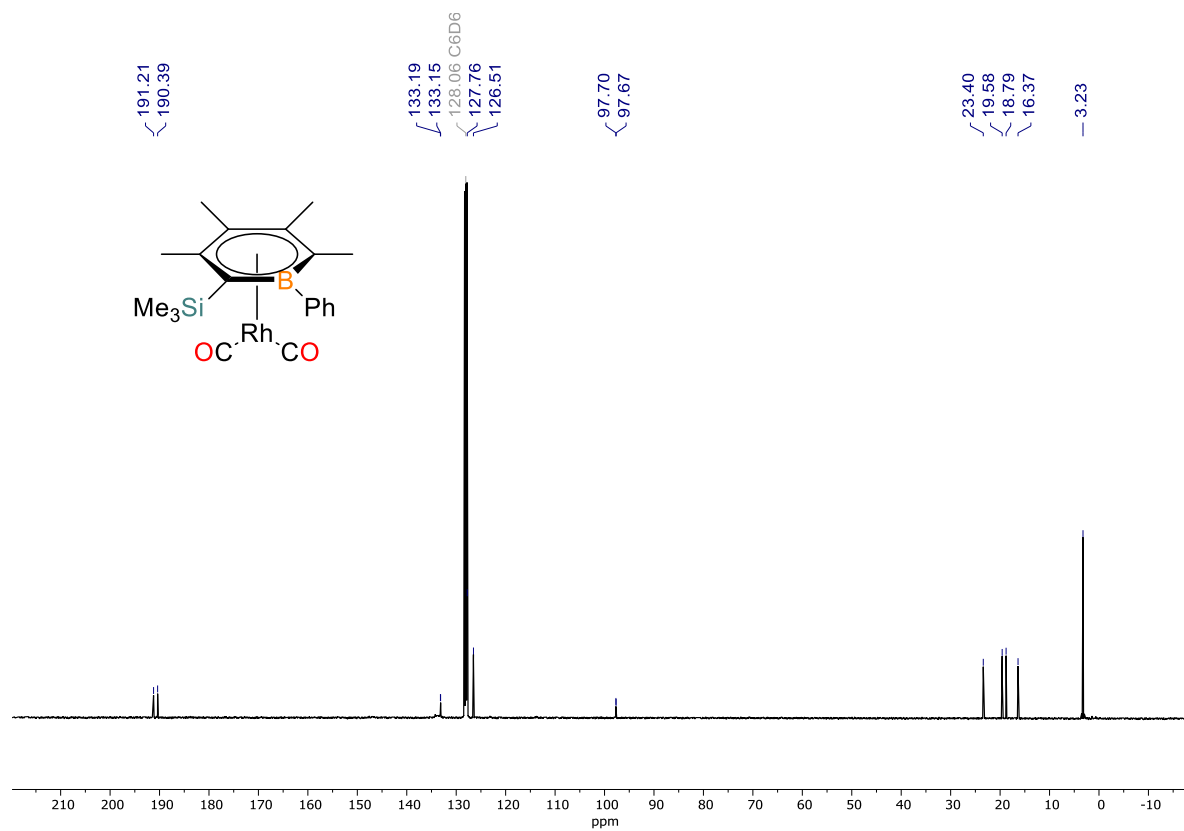

Figure S-44: Expansion of  $^{13}\text{C}\{^1\text{H}\}$  NMR spectrum of **1Rh** in  $\text{C}_6\text{D}_6$ .

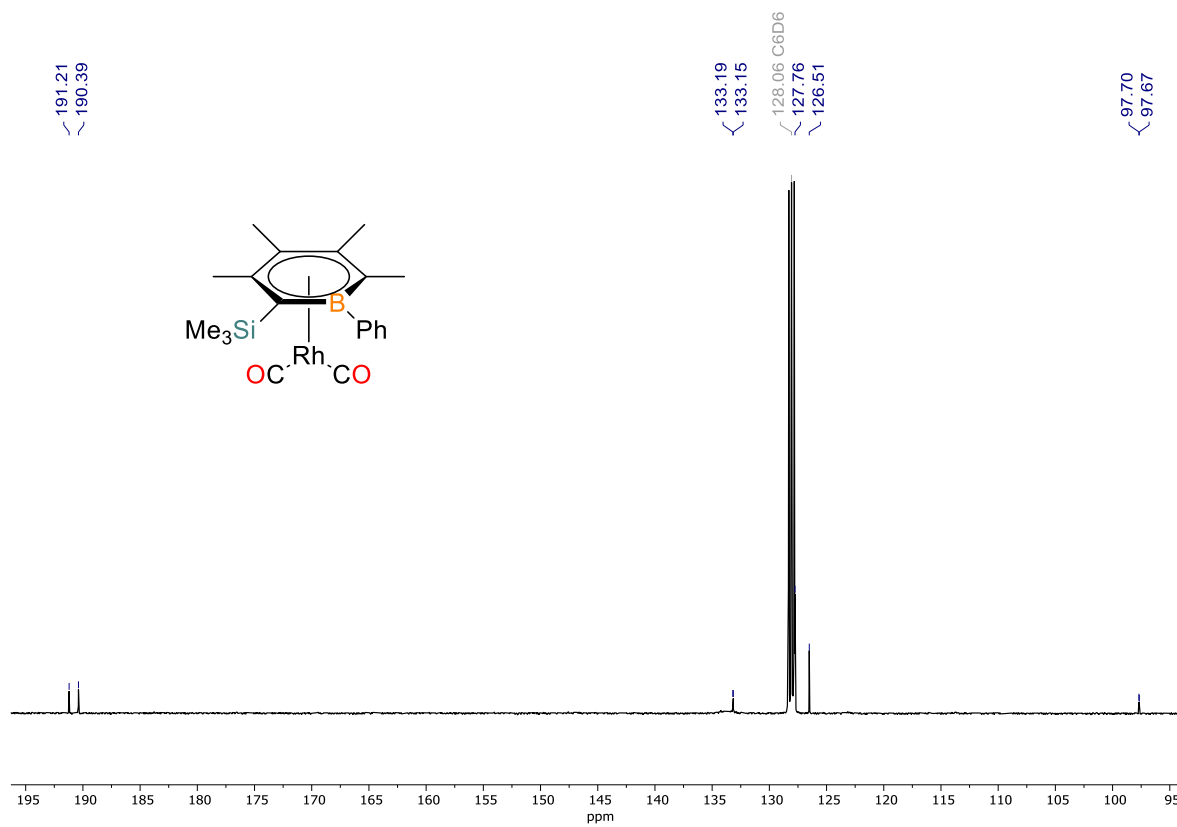

Figure S-45: Expansion of  $^{13}\text{C}\{^1\text{H}\}$  NMR spectrum of **1Rh** in  $\text{C}_6\text{D}_6$ .

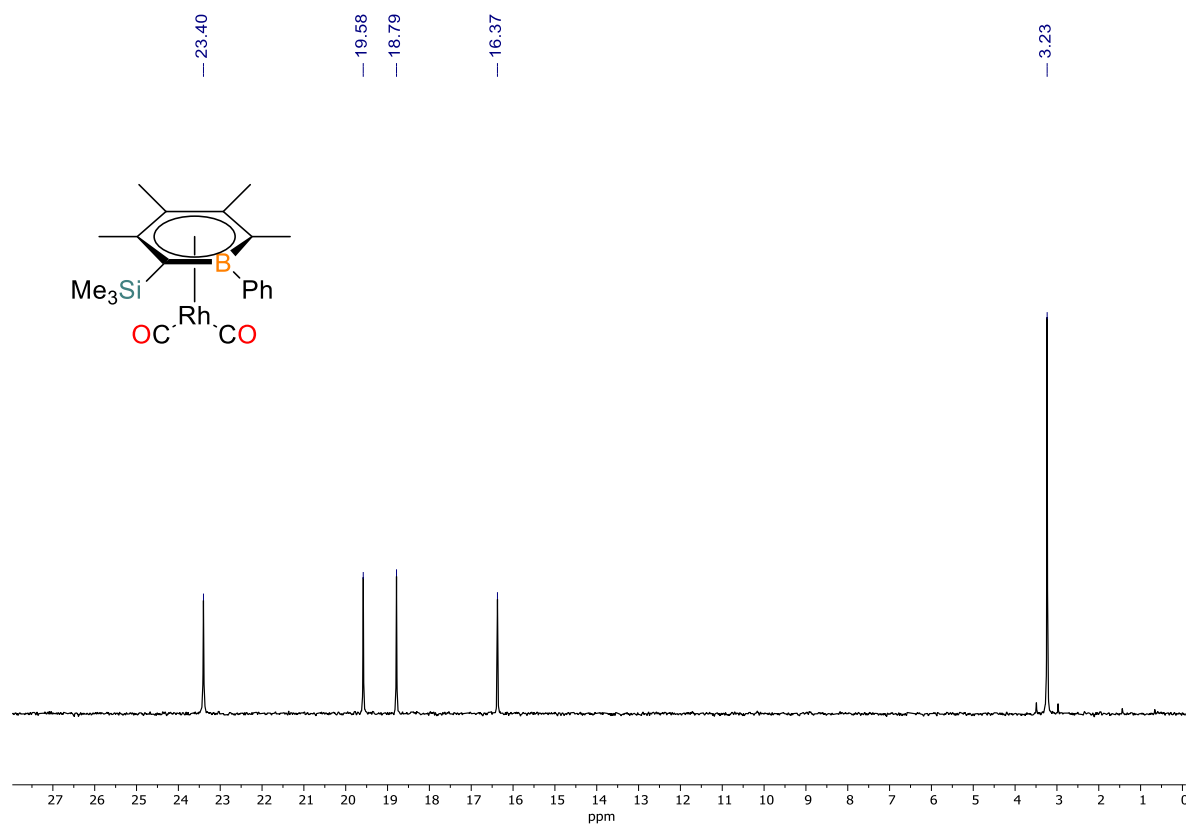

Figure S-46:  $^{11}\text{B}$  NMR spectrum of **1Rh** in  $\text{C}_6\text{D}_6$ .

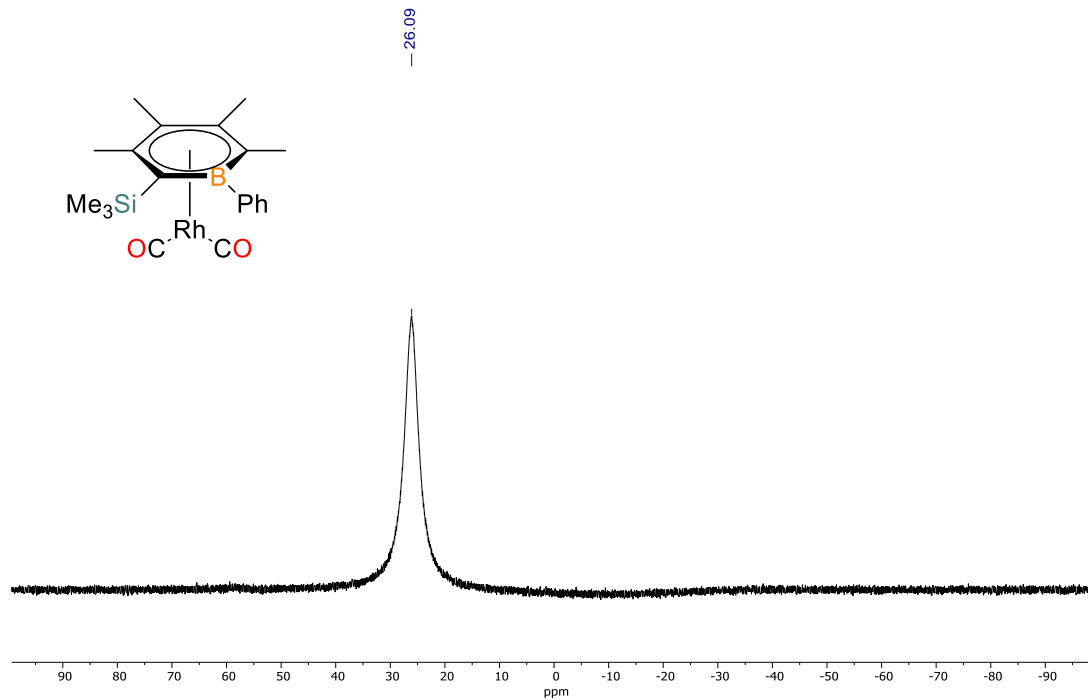



Figure S-47: FT-IR spectrum of **1Rh**.

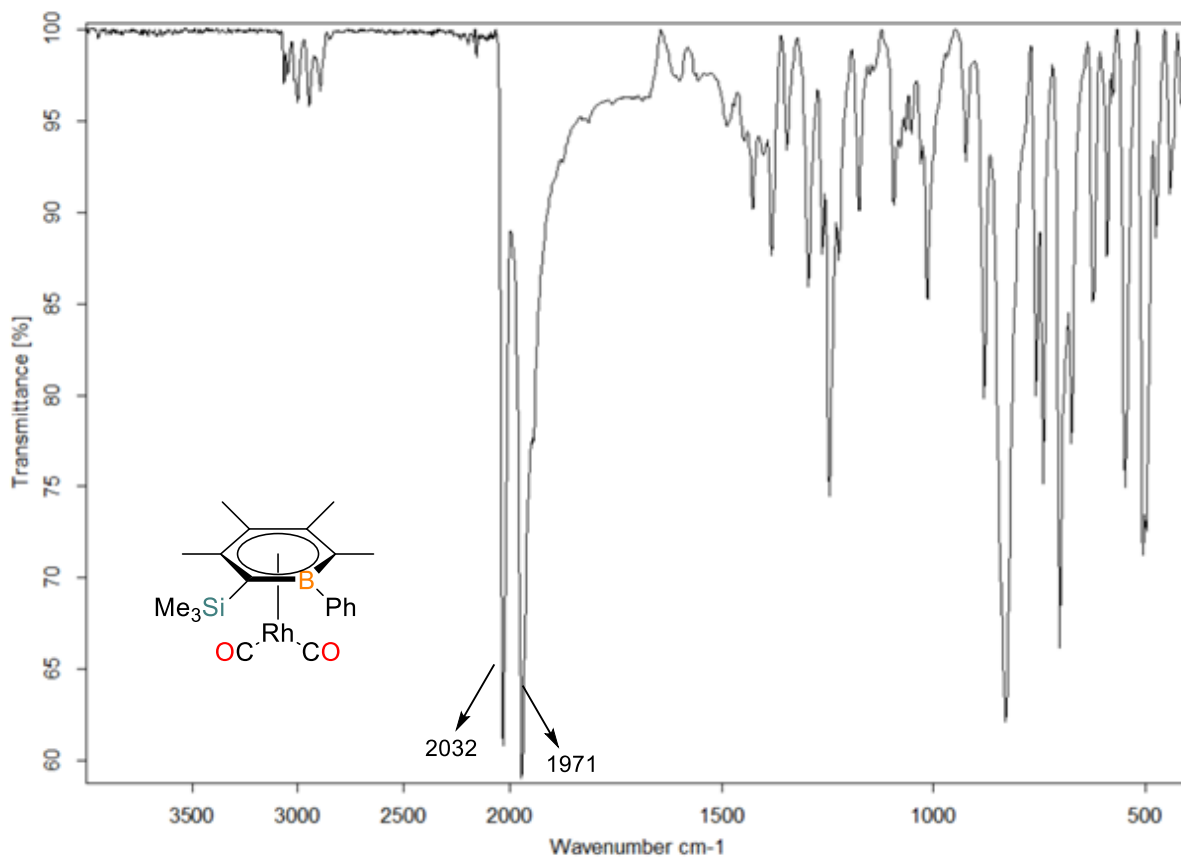

Figure S-48:  $^1\text{H}$  NMR spectrum of **2Rh** in  $\text{C}_6\text{D}_6$ .

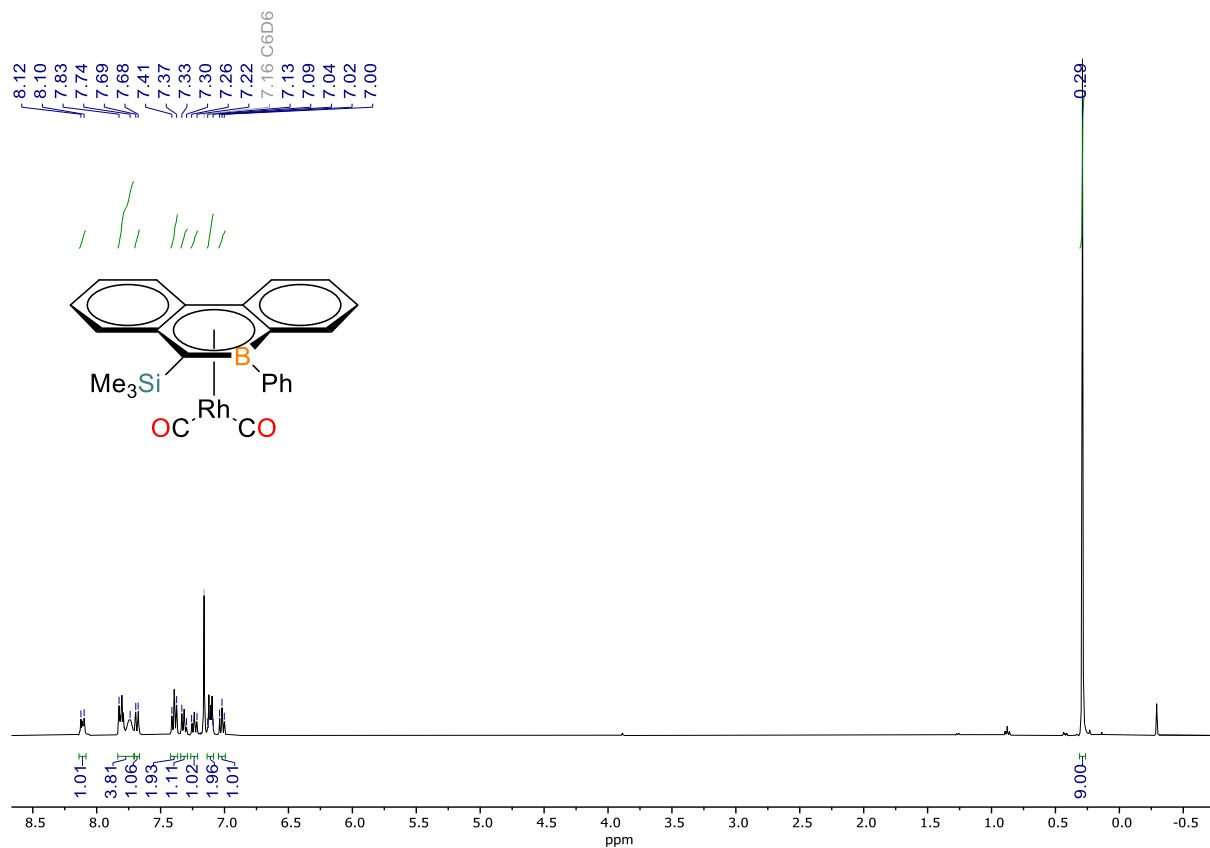

Figure S-49: Expansion of  $^1\text{H}$  NMR spectrum of **2Rh** in  $\text{C}_6\text{D}_6$ .

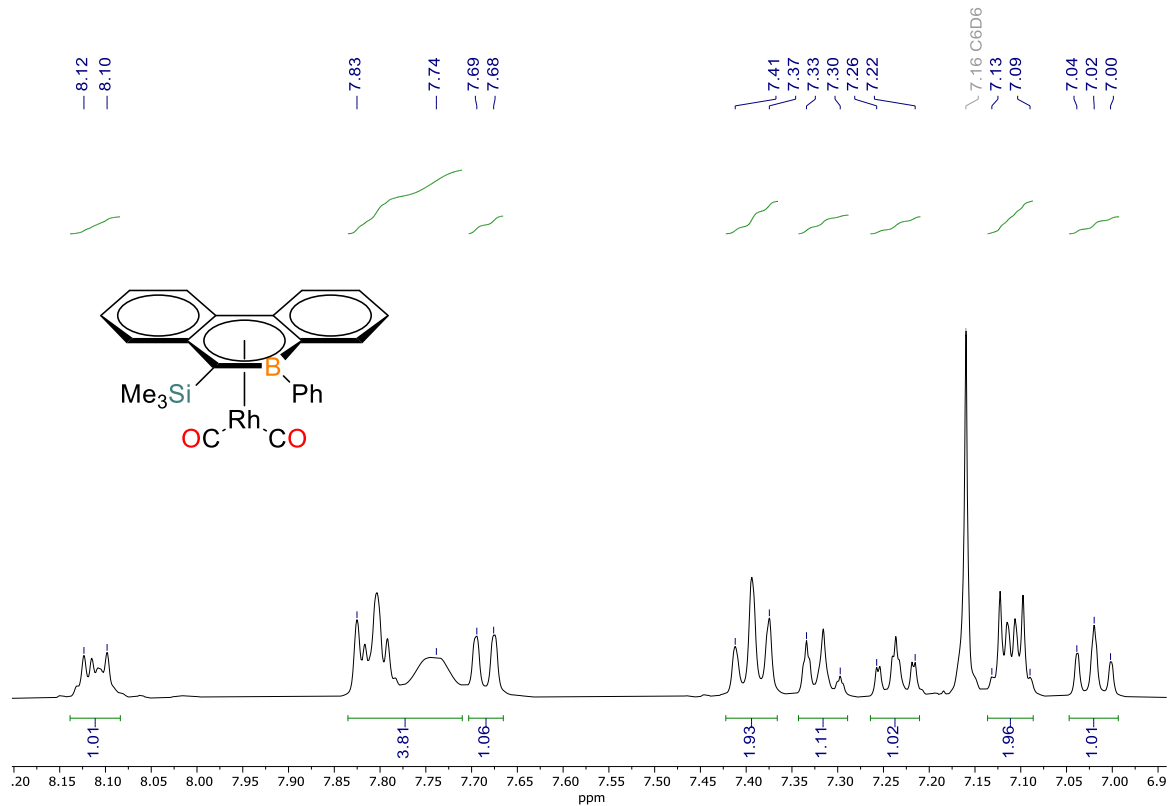

Figure S-50:  $^{13}\text{C}\{^1\text{H}\}$  NMR spectrum of **2Rh** in  $\text{C}_6\text{D}_6$ .

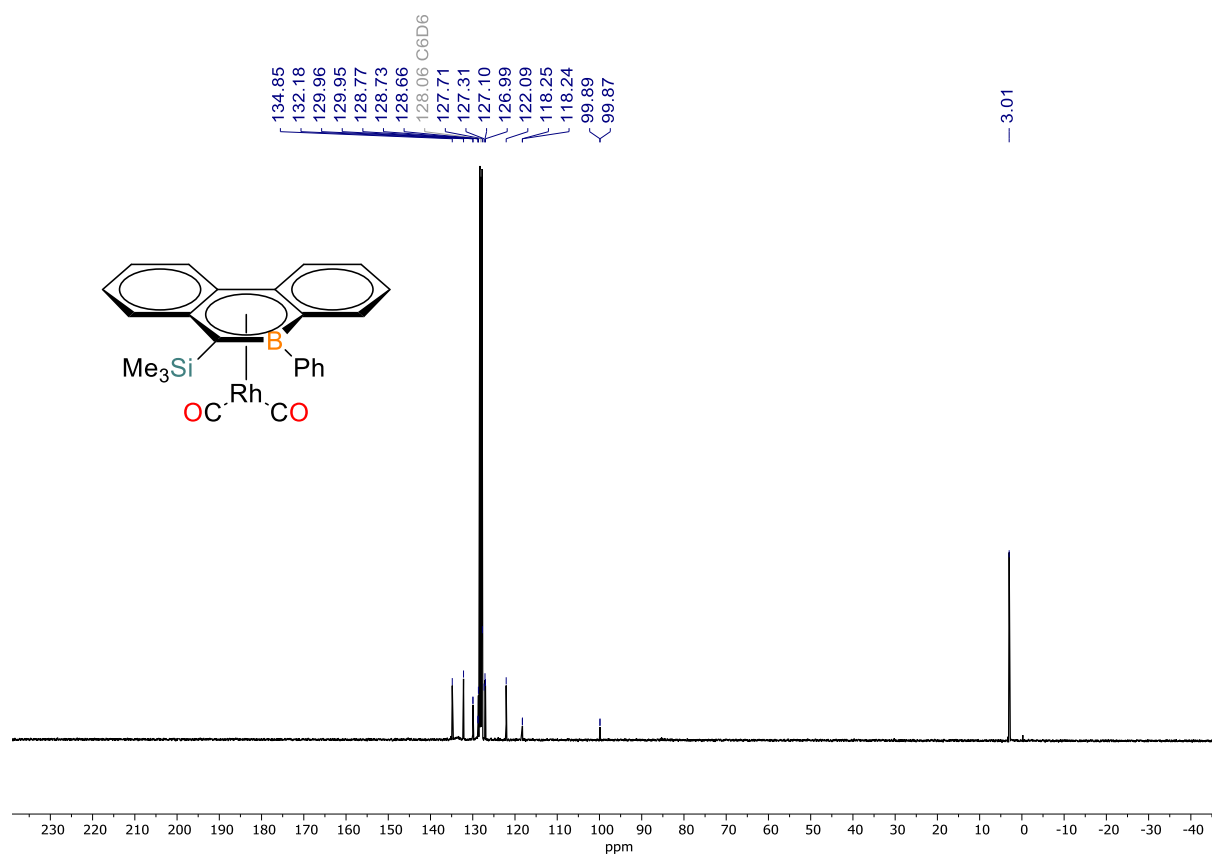

Figure S-51: Expansion of  $^{13}\text{C}\{^1\text{H}\}$  NMR spectrum of **2Rh** in  $\text{C}_6\text{D}_6$ .

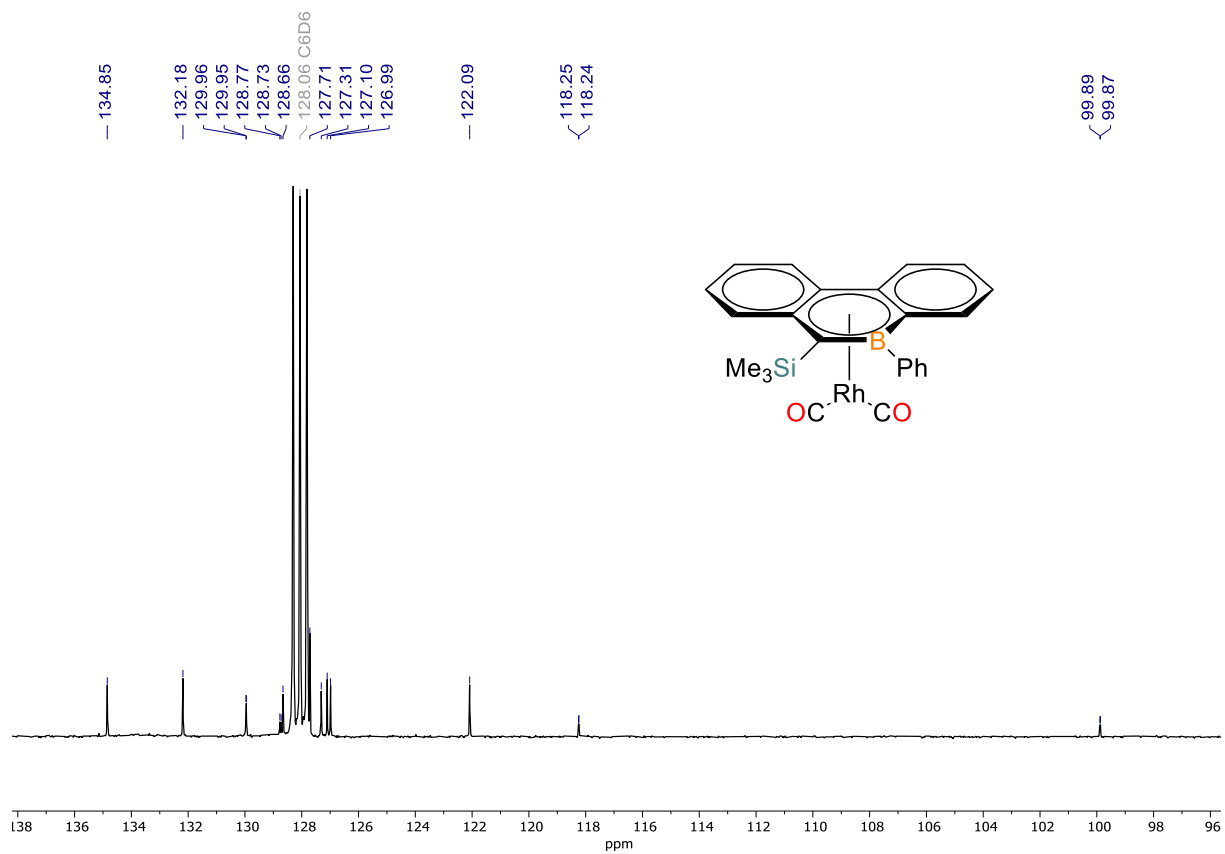

Figure S-52:  $^{11}\text{B}$  NMR spectrum of **2Rh** in  $\text{C}_6\text{D}_6$ .

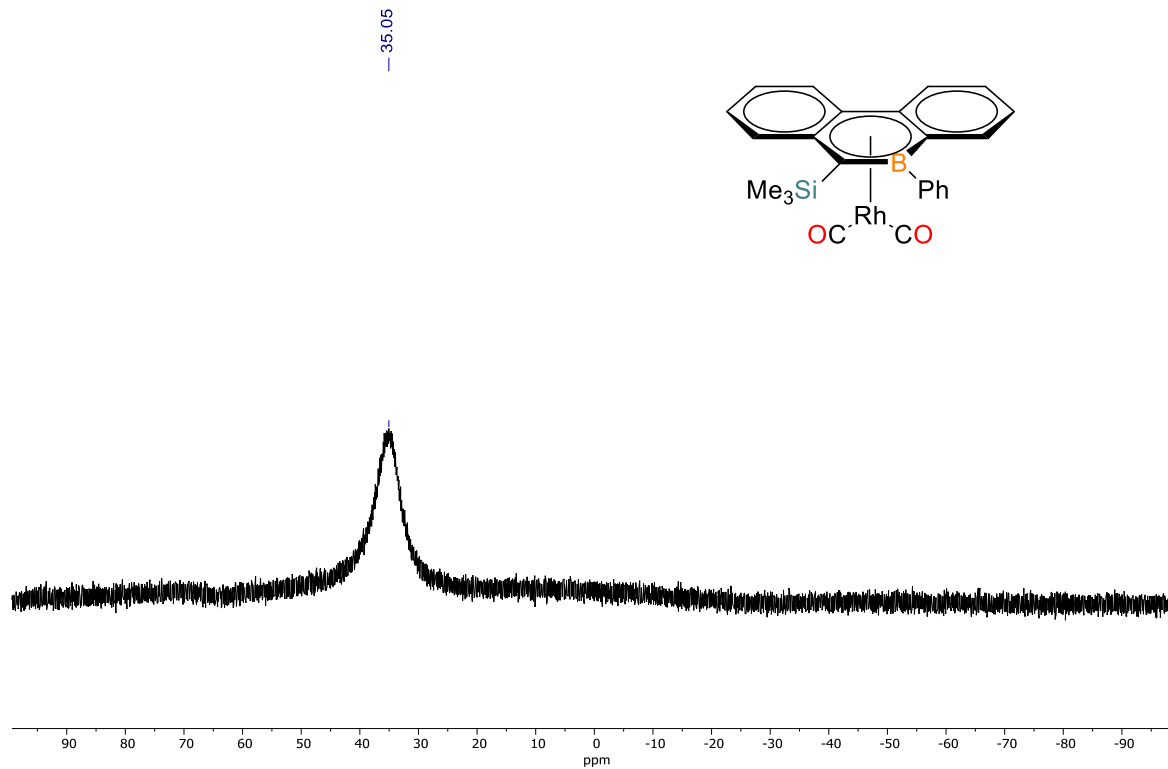

Figure S-53: FT-IR spectrum of **2Rh**.

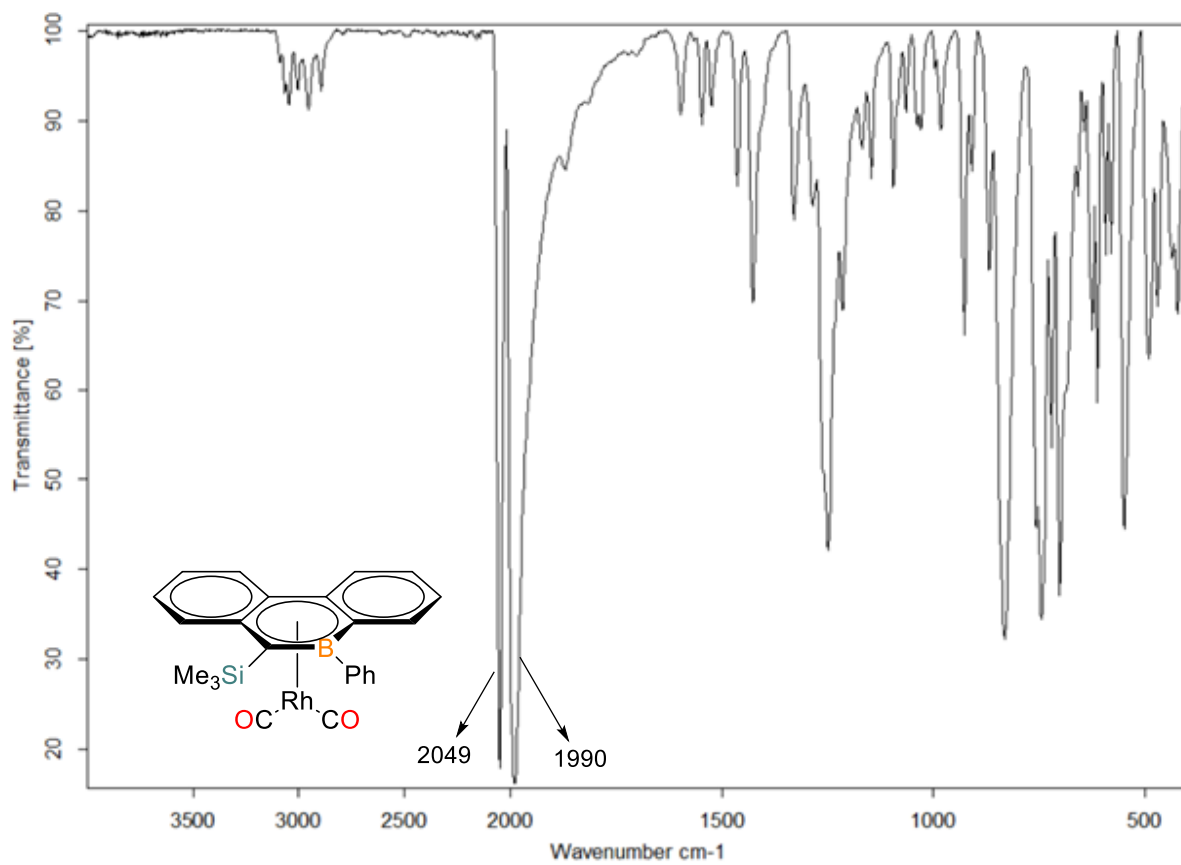

**Table S2:** X-ray crystallographic details for the metal complexes with **L1** and **L2**.

|                                      | <b>1Cr</b>                                                                                  | <b>1Mo</b>                                                                                  | <b>1W</b>                                            | <b>2Mo</b>                                                            | <b>2W</b>                                                            | <b>1Rh</b>                                               | <b>2Rh</b>                                           |
|--------------------------------------|---------------------------------------------------------------------------------------------|---------------------------------------------------------------------------------------------|------------------------------------------------------|-----------------------------------------------------------------------|----------------------------------------------------------------------|----------------------------------------------------------|------------------------------------------------------|
| CCDC                                 | 2203739                                                                                     | 2203740                                                                                     | 2203741                                              | 2203742                                                               | 2203743                                                              | 2203744                                                  | 2203745                                              |
| Empirical Formula                    | C <sub>33</sub> H <sub>50</sub> BCrKO <sub>9</sub> Si,<br>2(C <sub>6</sub> H <sub>6</sub> ) | C <sub>33</sub> H <sub>50</sub> BMoKO <sub>9</sub> Si,<br>2(C <sub>6</sub> H <sub>6</sub> ) | C <sub>33</sub> H <sub>50</sub> BKO <sub>9</sub> SiW | C <sub>46</sub> H <sub>48</sub> BCl <sub>2</sub> KMoO <sub>9</sub> Si | C <sub>46</sub> H <sub>48</sub> BCl <sub>2</sub> KO <sub>9</sub> SiW | C <sub>20</sub> H <sub>26</sub> BO <sub>2</sub> Rh<br>Si | C <sub>24</sub> H <sub>22</sub> BO <sub>2</sub> RhSi |
| FW (g/mol)                           | 876.95                                                                                      | 920.89                                                                                      | 852.57                                               | 989.68                                                                | 1077.59                                                              | 440.22                                                   | 484.22                                               |
| Crystal System                       | Triclinic                                                                                   | Triclinic                                                                                   | Monoclinic                                           | Monoclinic                                                            | Monoclinic                                                           | Monoclinic                                               | Monoclinic                                           |
| Space Group                          | P -1                                                                                        | P -1                                                                                        | C 2/c                                                | C c                                                                   | C c                                                                  | P 2 <sub>1</sub> /c                                      | P 2 <sub>1</sub> /n                                  |
| a (Å)                                | 11.350(1)                                                                                   | 11.2735(3)                                                                                  | 33.118(1)                                            | 14.3574(3)                                                            | 14.3661(4)                                                           | 17.3967(5)                                               | 12.3516(9)                                           |
| b (Å)                                | 11.5688(11)                                                                                 | 11.8132(4)                                                                                  | 11.7793(3)                                           | 32.3930(7)                                                            | 32.3267(8)                                                           | 7.7875(2)                                                | 13.2338(9)                                           |
| c (Å)                                | 18.8139(18)                                                                                 | 18.8859(6)                                                                                  | 20.0868(6)                                           | 9.8045(2)                                                             | 9.8108(2)                                                            | 15.7760(4)                                               | 13.6808(9)                                           |
| α (deg)                              | 74.292(4)                                                                                   | 73.690(1)                                                                                   | 90                                                   | 90                                                                    | 90                                                                   | 90                                                       | 90                                                   |
| β (deg)                              | 86.768(3)                                                                                   | 81.302(1)                                                                                   | 108.163(1)                                           | 102.3096(8)                                                           | 102.329(1)                                                           | 105.7830(9)                                              | 95.797(3)                                            |
| γ (deg)                              | 77.513(3)                                                                                   | 78.301(1)                                                                                   | 90                                                   | 90                                                                    | 90                                                                   | 90                                                       | 90                                                   |
| V (Å <sup>3</sup> )                  | 2321.9(4)                                                                                   | 2351.86(13)                                                                                 | 7445.6(4)                                            | 4455.04(16)                                                           | 4451.14(2)                                                           | 2056.70(1)                                               | 2224.8(3)                                            |
| Z                                    | 2                                                                                           | 2                                                                                           | 4                                                    | 4                                                                     | 4                                                                    | 4                                                        | 4                                                    |
| D <sub>c</sub> (g cm <sup>-3</sup> ) | 1.254                                                                                       | 1.300                                                                                       | 1.521                                                | 1.476                                                                 | 1.608                                                                | 1.422                                                    | 1.446                                                |
| Radiation λ (Å)                      | 0.71073                                                                                     | 0.71073                                                                                     | 0.71073                                              | 0.71073                                                               | 0.71073                                                              | 0.71073                                                  | 0.71073                                              |
| Temp (K)                             | 150                                                                                         | 150                                                                                         | 150                                                  | 150                                                                   | 150                                                                  | 150                                                      | 150                                                  |
| R1 [I > 2(σ)I] <sup>a</sup>          | 0.0442                                                                                      | 0.0356                                                                                      | 0.0248                                               | 0.0190                                                                | 0.0248                                                               | 0.0181                                                   | 0.0591                                               |
| wR2 (F <sup>2</sup> ) <sup>a</sup>   | 0.1404                                                                                      | 0.0992                                                                                      | 0.0847                                               | 0.0596                                                                | 0.0714                                                               | 0.0460                                                   | 0.1519                                               |
| GOF (S) <sup>a</sup>                 | 1.145                                                                                       | 1.144                                                                                       | 1.222                                                | 1.191                                                                 | 1.186                                                                | 1.093                                                    | 1.215                                                |

<sup>a</sup>  $R1(F[I > 2(I)]) = \sum ||F_o| - |F_c|| / \sum |F_o|$ ;  $wR2 = \{\sum [w(F_o^2 - F_c^2)^2] / \sum [w(F_o^2)^2]\}^{1/2}$ ;  $S(\text{all data}) = [w(F_o^2 - F_c^2)^2 / (n - p)]^{1/2}$  ( $n$  = no. of data;  $p$  = no. of parameters varied);  $w = 1/[\sigma^2(F_o^2) + (aP)^2 + bP]$  where  $P = (F_o^2 + 2F_c^2)/3$  and  $a$  and  $b$  are constants suggested by the refinement program.



## **Theoretical calculations**

The theoretical calculations were carried out by using Gaussian 16.<sup>2</sup> Geometry optimizations were performed using the B3LYP<sup>3</sup> functional with a standard 6-31+G(d,p)<sup>4</sup> basis set (LANL2DZ basis set for all metals Cr, Mo, W).<sup>5</sup> Frequency analysis were done to obtain the thermodynamic energy corrections and to ensure that the optimized structures were at a minimum. The Cartesian coordinates of the geometry-optimized structures are given below.

**Complex 1Cr**

|    |             |             |             |
|----|-------------|-------------|-------------|
| K  | 3.39143900  | 0.20790200  | -0.42495100 |
| B  | -3.80457900 | -0.57226100 | 0.41311800  |
| Cr | -1.38152600 | -0.91169200 | 0.60423700  |
| O  | -1.25586000 | -0.27115900 | -2.31466800 |
| O  | 0.49510400  | -3.18793600 | 0.15296200  |
| O  | 1.11140900  | 0.65014300  | 1.06241800  |
| O  | 1.97365800  | 0.09157000  | -2.79762500 |
| O  | 2.55618100  | 2.65723900  | -1.76154100 |
| O  | 4.18701100  | 2.76652600  | 0.59059900  |
| O  | 5.77359500  | 0.51380000  | 1.27667000  |
| O  | 4.98185400  | -2.06153600 | 0.33739100  |
| O  | 3.48116500  | -2.17863300 | -2.09680800 |
| Si | -3.27363700 | 2.36229100  | 0.84394400  |
| C  | -3.13116300 | 0.51013400  | 1.28080500  |
| C  | -2.40396000 | 0.08705000  | 2.43511600  |
| C  | -2.13838500 | -1.29661100 | 2.70766400  |
| C  | -2.69187800 | -2.33752300 | 1.88707000  |
| C  | -3.46228800 | -2.03350900 | 0.73877000  |
| C  | -1.90846300 | 1.08521000  | 3.47629300  |
| H  | -2.13988500 | 0.72799600  | 4.48505100  |
| H  | -2.39893600 | 2.04986000  | 3.36377700  |
| H  | -0.82695800 | 1.25303500  | 3.42726800  |
| C  | -1.33304700 | -1.67561500 | 3.93889500  |
| H  | -0.57112200 | -0.93025000 | 4.17284400  |
| H  | -0.81538200 | -2.62648700 | 3.80617500  |
| H  | -1.97725300 | -1.77629000 | 4.82578400  |
| C  | -2.46146800 | -3.77870500 | 2.31953100  |
| H  | -2.79020200 | -3.92054800 | 3.35571600  |
| H  | -1.40658000 | -4.06747900 | 2.26998900  |
| H  | -3.02036500 | -4.47894100 | 1.70070500  |
| C  | -3.99465600 | -3.17782100 | -0.11212200 |
| H  | -4.44315000 | -2.80366000 | -1.03311800 |
| H  | -4.77932800 | -3.73651800 | 0.41822700  |
| H  | -3.21638300 | -3.89642000 | -0.39336300 |
| C  | -4.92420100 | -0.25879400 | -0.68070000 |
| C  | -6.19570800 | 0.14239800  | -0.21995400 |
| H  | -6.35610400 | 0.26520700  | 0.84967000  |
| C  | -7.26171500 | 0.38735100  | -1.09219100 |
| H  | -8.22638600 | 0.69645700  | -0.69604100 |
| C  | -7.08586800 | 0.23573700  | -2.47062300 |
| H  | -7.90809300 | 0.42766400  | -3.15537700 |
| C  | -5.83856700 | -0.16926100 | -2.95647400 |
| H  | -5.68633800 | -0.29181600 | -4.02655000 |
| C  | -4.78204700 | -0.41547200 | -2.07392500 |
| H  | -3.82281200 | -0.71831800 | -2.48354000 |
| C  | -1.67111000 | 3.36593100  | 1.15236600  |
| H  | -1.51823000 | 3.65829400  | 2.19580400  |
| H  | -1.72154900 | 4.28774900  | 0.55849100  |
| H  | -0.78535600 | 2.80713400  | 0.83242700  |
| C  | -3.64459100 | 2.69366200  | -0.98683200 |
| H  | -2.93851200 | 2.17964300  | -1.64754800 |
| H  | -3.54567700 | 3.77348200  | -1.16101500 |
| H  | -4.65154900 | 2.39437400  | -1.28421800 |
| C  | -4.66274500 | 3.18576200  | 1.85614500  |
| H  | -4.51223300 | 3.08218500  | 2.93711800  |

|   |             |             |             |
|---|-------------|-------------|-------------|
| H | -5.63295100 | 2.73825400  | 1.61309000  |
| H | -4.72298500 | 4.25764100  | 1.62785800  |
| C | -1.32996500 | -0.52091800 | -1.16748900 |
| C | -0.26941900 | -2.30600600 | 0.33039400  |
| C | 0.09123600  | 0.06128300  | 0.89079200  |
| C | 1.52770500  | 1.28112100  | -3.43912100 |
| H | 0.57210000  | 1.09603900  | -3.94927100 |
| H | 2.27285300  | 1.61344100  | -4.17910300 |
| C | 1.30947300  | 2.35308300  | -2.39289300 |
| H | 0.90618600  | 3.25243300  | -2.88358200 |
| H | 0.58143400  | 2.00671600  | -1.64825400 |
| C | 2.44609600  | 3.68003700  | -0.77797700 |
| H | 1.72609200  | 3.38812200  | -0.00036900 |
| H | 2.09809100  | 4.61749200  | -1.24037200 |
| C | 3.80875500  | 3.91719900  | -0.16067500 |
| H | 4.55172600  | 4.11627700  | -0.94810900 |
| H | 3.75588800  | 4.79642600  | 0.50021800  |
| C | 5.44624100  | 2.88789800  | 1.23330300  |
| H | 5.46667600  | 3.78525200  | 1.87226400  |
| H | 6.25195100  | 2.97694500  | 0.48787000  |
| C | 5.67276000  | 1.66887000  | 2.10425300  |
| H | 6.60267800  | 1.80587700  | 2.67854700  |
| H | 4.83912300  | 1.55690200  | 2.81364000  |
| C | 6.00968700  | -0.68467600 | 2.00856200  |
| H | 5.16502400  | -0.89216200 | 2.68301500  |
| H | 6.92176000  | -0.58450000 | 2.61798600  |
| C | 6.19613600  | -1.83259500 | 1.03806000  |
| H | 7.00571800  | -1.59619000 | 0.33023500  |
| H | 6.48526000  | -2.73180600 | 1.60524900  |
| C | 5.06385400  | -3.14665300 | -0.58611000 |
| H | 5.31243600  | -4.07600500 | -0.05035400 |
| H | 5.85505100  | -2.94770500 | -1.32499300 |
| C | 3.73250000  | -3.32311500 | -1.28456100 |
| H | 3.78703200  | -4.22787700 | -1.91123200 |
| H | 2.92348100  | -3.45902200 | -0.55427500 |
| C | 2.26361000  | -2.28362400 | -2.84105200 |
| H | 1.41693700  | -2.42459000 | -2.15872300 |
| H | 2.31300100  | -3.15026100 | -3.51926000 |
| C | 2.07126500  | -1.02905300 | -3.66695400 |
| H | 2.91161400  | -0.89220300 | -4.36602800 |
| H | 1.14394700  | -1.13891200 | -4.24813500 |

**Complex 1Mo**

|    |             |             |             |
|----|-------------|-------------|-------------|
| K  | -3.56966700 | 0.26259200  | 0.40049100  |
| B  | 3.88709300  | -0.48634300 | -0.32285100 |
| O  | 1.04354000  | -0.21539300 | 2.56441400  |
| O  | -0.58218800 | -3.38922500 | -0.02186700 |
| O  | -1.28621700 | 0.65182700  | -1.09648500 |
| O  | -2.14793900 | 0.36049100  | 2.76653200  |
| O  | -2.78192600 | 2.82653200  | 1.54088800  |
| O  | -4.41391100 | 2.71394100  | -0.81232300 |
| O  | -5.95236500 | 0.38066300  | -1.31746000 |
| O  | -5.08813700 | -2.09919200 | -0.19804600 |
| O  | -3.57247400 | -2.00292000 | 2.22554700  |
| Si | 3.26864100  | 2.39563200  | -0.97470500 |
| C  | 3.20348300  | 0.51256200  | -1.28303500 |

|   |             |             |             |                   |             |             |             |
|---|-------------|-------------|-------------|-------------------|-------------|-------------|-------------|
| C | 2.54618600  | -0.01981800 | -2.44005000 | H                 | -4.80012400 | 4.17843800  | 0.61216100  |
| C | 2.35365700  | -1.43015600 | -2.63694600 | H                 | -4.01670500 | 4.75121600  | -0.88843500 |
| C | 2.91376900  | -2.39474600 | -1.72268700 | C                 | -5.67860200 | 2.75860500  | -1.45439000 |
| C | 3.63714600  | -1.98607200 | -0.57407900 | H                 | -5.72209300 | 3.60424700  | -2.15931100 |
| C | 2.07381600  | 0.88510400  | -3.57282700 | H                 | -6.48255400 | 2.88625800  | -0.71270200 |
| H | 2.40734900  | 0.48914400  | -4.53787100 | C                 | -5.88168900 | 1.47256200  | -2.22959600 |
| H | 2.48915800  | 1.88589700  | -3.48113200 | H                 | -6.81713000 | 1.54531600  | -2.80666300 |
| H | 0.98331000  | 0.97841200  | -3.61549800 | H                 | -5.04906300 | 1.32625600  | -2.93390800 |
| C | 1.66517600  | -1.92020500 | -3.90026500 | C                 | -6.16014300 | -0.87452100 | -1.95753300 |
| H | 0.88186400  | -1.23621000 | -4.23030200 | H                 | -5.31326200 | -1.10890900 | -2.62024500 |
| H | 1.19531200  | -2.89336800 | -3.75576900 | H                 | -7.07724900 | -0.84299200 | -2.56680700 |
| H | 2.38132000  | -2.02454300 | -4.73004600 | C                 | -6.31159800 | -1.95292500 | -0.90467800 |
| C | 2.76771700  | -3.86804000 | -2.07404500 | H                 | -7.12346700 | -1.68661200 | -0.21016500 |
| H | 1.72017100  | -4.17665700 | -2.14089000 | H                 | -6.58023200 | -2.89801400 | -1.40317400 |
| H | 3.25063400  | -4.50936300 | -1.33902300 | C                 | -5.13534200 | -3.11917100 | 0.79956000  |
| H | 3.23119700  | -4.07290900 | -3.04708200 | H                 | -5.36032000 | -4.09010800 | 0.33154800  |
| C | 4.23190300  | -3.04910500 | 0.34027000  | H                 | -5.92835900 | -2.89064800 | 1.52787300  |
| H | 4.66182100  | -2.59629900 | 1.23426500  | C                 | -3.79636800 | -3.20962200 | 1.49986600  |
| H | 5.04279500  | -3.59620000 | -0.16173000 | H                 | -3.82340700 | -4.06769700 | 2.19064400  |
| H | 3.49441800  | -3.78949800 | 0.66988300  | H                 | -2.98757200 | -3.37881800 | 0.77622700  |
| C | 4.93384400  | -0.05595700 | 0.80065400  | C                 | -2.34434400 | -2.01542200 | 2.95971700  |
| C | 6.21713400  | 0.36182400  | 0.39149600  | H                 | -1.49827200 | -2.16246600 | 2.27775700  |
| H | 6.44210200  | 0.41764400  | -0.67205700 | H                 | -2.35164500 | -2.84116900 | 3.68849900  |
| C | 7.21482800  | 0.70808600  | 1.30923600  | C                 | -2.19278600 | -0.70652400 | 3.70589900  |
| H | 8.19172900  | 1.02733600  | 0.95322300  | H                 | -3.03151500 | -0.55900100 | 4.40463300  |
| C | 6.95517300  | 0.64451600  | 2.68126200  | H                 | -1.25522200 | -0.74449800 | 4.27857300  |
| H | 7.72411600  | 0.91537900  | 3.40034200  | Mo                | 1.32677000  | -0.94529700 | -0.47660200 |
| C | 5.69411600  | 0.22460400  | 3.11666100  |                   |             |             |             |
| H | 5.47747000  | 0.16930500  | 4.18111900  |                   |             |             |             |
| C | 4.70652800  | -0.12267000 | 2.18967700  | <b>Complex 1W</b> |             |             |             |
| H | 3.73417000  | -0.43727200 | 2.55785900  | O                 | 3.30700200  | -1.65374700 | 2.61545300  |
| C | 1.64629200  | 3.31514200  | -1.41141300 | C                 | 2.06392100  | -1.32965800 | 3.24515700  |
| H | 1.51750900  | 3.52387100  | -2.47792400 | H                 | 1.23666800  | -1.45884900 | 2.53706800  |
| H | 1.64703100  | 4.28021200  | -0.88821100 | H                 | 1.89370200  | -1.99636700 | 4.10520100  |
| H | 0.76943800  | 2.75142500  | -1.07547700 | C                 | 2.11106700  | 0.10125500  | 3.73815900  |
| C | 3.55340800  | 2.86276200  | 0.84132400  | H                 | 2.92930400  | 0.23473500  | 4.46350900  |
| H | 2.83534200  | 2.36875900  | 1.50442900  | H                 | 1.15569000  | 0.32596400  | 4.23314500  |
| H | 3.41130800  | 3.94746000  | 0.93738100  | O                 | 2.30026700  | 0.96839400  | 2.62651700  |
| H | 4.55547600  | 2.61986400  | 1.19993400  | C                 | 2.08511700  | 2.34306100  | 2.92098700  |
| C | 4.67003000  | 3.19414400  | -1.99002300 | H                 | 1.10013700  | 2.47597700  | 3.39007000  |
| H | 4.56378600  | 3.01293900  | -3.06600700 | H                 | 2.86352100  | 2.71003300  | 3.60859800  |
| H | 5.64337800  | 2.79583400  | -1.68230300 | C                 | 2.10796900  | 3.13146900  | 1.62858000  |
| H | 4.68954600  | 4.28037000  | -1.83408900 | H                 | 1.88022000  | 4.18592700  | 1.85064200  |
| C | 1.14704700  | -0.48770200 | 1.42397100  | H                 | 1.34441600  | 2.74490000  | 0.94101800  |
| C | 0.14459000  | -2.47315000 | -0.18147300 | O                 | 3.40394000  | 3.02678600  | 1.03370100  |
| C | -0.27768900 | 0.06463700  | -0.85735600 | C                 | 3.51121300  | 3.74084500  | -0.19270900 |
| C | -1.73086800 | 1.60298400  | 3.31998800  | H                 | 2.77120600  | 3.36870100  | -0.91527700 |
| H | -0.77376800 | 1.47700900  | 3.84517700  | H                 | 3.33217600  | 4.81514100  | -0.02462000 |
| H | -2.48559100 | 1.97339000  | 4.03167200  | C                 | 4.91067100  | 3.56130100  | -0.74381700 |
| C | -1.53171600 | 2.59825600  | 2.19649700  | H                 | 5.04550200  | 4.22801100  | -1.61008300 |
| H | -1.14983400 | 3.54094000  | 2.61823800  | H                 | 5.65500900  | 3.82898900  | 0.02173600  |
| H | -0.79426100 | 2.21214900  | 1.48060800  | O                 | 5.08430800  | 2.20462700  | -1.14405900 |
| C | -2.68785700 | 3.76449000  | 0.47461400  | B                 | -3.60133600 | 0.59416800  | -0.68766500 |
| H | -1.96394900 | 3.41834500  | -0.27685600 | K                 | 3.73293800  | 0.18977100  | 0.40130100  |
| H | -2.35429900 | 4.74283100  | 0.85587300  | O                 | -0.93072400 | 0.93773200  | 2.29278800  |
| C | -4.05451000 | 3.92808200  | -0.15791900 | O                 | 0.38784200  | -2.83431200 | 0.30977900  |
|   |             |             |             | O                 | 1.64620200  | 0.90292100  | -1.29517000 |



|   |             |             |             |
|---|-------------|-------------|-------------|
| H | -5.56000200 | 5.44336800  | -0.18015500 |
| C | -5.86231100 | 3.32595500  | -0.49744700 |
| H | -6.94087200 | 3.41094700  | -0.60734900 |
| C | -5.24920300 | 2.07254200  | -0.59196700 |
| H | -5.87048100 | 1.19829500  | -0.77685900 |
| C | -5.84148300 | -0.90192700 | 2.22552700  |
| H | -6.22868900 | -0.73406000 | 3.23851500  |
| H | -6.01217700 | -1.95442800 | 1.97219400  |
| H | -6.44110000 | -0.29748800 | 1.53507800  |
| C | -3.06264500 | -1.33647200 | 3.49816400  |
| H | -2.04231500 | -0.94936700 | 3.59056000  |
| H | -2.98593700 | -2.42091000 | 3.38703300  |
| H | -3.57711200 | -1.13552300 | 4.44730400  |
| C | -3.87520600 | 1.39489500  | 2.70162600  |
| H | -4.10098200 | 1.41369800  | 3.77613100  |
| H | -4.56896900 | 2.07069600  | 2.19749000  |
| H | -2.86400600 | 1.79296100  | 2.56700000  |
| C | -0.42330000 | -1.52429000 | 1.17520500  |
| C | -0.37765200 | 0.80338500  | 0.15035500  |
| C | 0.44499500  | -1.13473900 | -1.13494400 |
| C | 3.69346800  | 3.49076100  | -1.60524800 |
| H | 3.33394300  | 4.04929700  | -2.48393900 |
| H | 4.73837300  | 3.77889000  | -1.41318200 |
| C | 2.82646000  | 3.84872100  | -0.41431800 |
| H | 2.84317400  | 4.94315100  | -0.28869800 |
| H | 1.78882500  | 3.53132800  | -0.58323400 |
| C | 2.64477000  | 3.56187300  | 1.94484500  |
| H | 1.57693900  | 3.33488000  | 1.83475700  |
| H | 2.76274100  | 4.63832800  | 2.14727500  |
| C | 3.22433100  | 2.77974100  | 3.10616700  |
| H | 4.31604000  | 2.91926000  | 3.14901200  |
| H | 2.78953600  | 3.15994300  | 4.04399300  |
| C | 3.44373300  | 0.57161500  | 3.97216600  |
| C | 2.98251700  | -0.85853600 | 3.75897900  |
| C | 3.51189300  | -2.71378200 | 2.33087000  |
| H | 2.66201100  | -3.21059500 | 2.81795800  |
| H | 4.44644400  | -3.06114300 | 2.79676700  |
| C | 3.48296800  | -3.07263400 | 0.85515400  |
| H | 3.68443100  | -4.15102600 | 0.75234400  |
| H | 2.49095800  | -2.86961300 | 0.43089000  |
| C | 4.60026400  | -2.62909100 | -1.21152000 |
| H | 3.62387100  | -2.56225200 | -1.70943100 |
| H | 4.98165100  | -3.65716700 | -1.33109600 |
| C | 5.60316700  | -1.66117100 | -1.82374400 |
| H | 6.52588700  | -1.68536300 | -1.23462900 |
| H | 5.83847100  | -1.97946900 | -2.85009200 |
| C | 4.44900700  | 0.13599700  | -2.96596100 |
| C | 4.40081400  | 1.65248200  | -2.94942200 |
| H | 4.54421600  | 0.61975800  | 3.95811900  |
| H | 3.09495700  | 0.91301700  | 4.96002300  |
| H | 1.88921900  | -0.93589800 | 3.82405600  |
| H | 3.42859200  | -1.47944600 | 4.55059600  |
| H | 4.96932400  | -0.18456300 | -3.88169700 |
| H | 3.43213800  | -0.27948600 | -2.97787600 |
| H | 3.96122000  | 2.01313800  | -3.89278100 |
| H | 5.42351700  | 2.04956800  | -2.86413900 |

### Complex 2Mo

|    |             |             |             |
|----|-------------|-------------|-------------|
| K  | -3.33419200 | -0.24351600 | 0.25819800  |
| B  | 3.73166800  | 0.35116600  | 0.12879100  |
| Mo | 1.12121300  | 0.56415200  | -0.25519100 |
| O  | -1.46505300 | 2.30302000  | -0.00159800 |
| O  | -1.00081500 | -1.48313000 | -1.24400500 |
| O  | 0.55212000  | -0.53956700 | 2.61158500  |
| O  | -2.86390500 | -1.66434900 | 2.62206400  |
| O  | -3.54845800 | 1.03178200  | 2.89874700  |
| O  | -4.90629000 | 2.31108000  | 0.70758300  |
| O  | -5.16553100 | 0.83066400  | -1.60665000 |
| O  | -4.67427400 | -1.91321900 | -1.79558000 |
| O  | -3.51020000 | -3.25569800 | 0.48310400  |
| Si | 3.59124000  | -2.23105200 | -1.38313300 |
| C  | 3.27835700  | -0.36671500 | -1.13251300 |
| C  | 2.73136400  | 0.44301600  | -2.22062400 |
| C  | 2.51092700  | -0.10688700 | -3.53143600 |
| H  | 2.80115000  | -1.13288800 | -3.70879100 |
| C  | 1.99894400  | 0.61714100  | -4.58050900 |
| H  | 1.88293600  | 0.14828200  | -5.55428300 |
| C  | 1.62709900  | 1.96770000  | -4.39298900 |
| H  | 1.20973600  | 2.54549900  | -5.21258900 |
| C  | 1.81338100  | 2.54896700  | -3.16114500 |
| H  | 1.54271100  | 3.59063700  | -3.04132700 |
| C  | 2.38239700  | 1.84519300  | -2.05431000 |
| C  | 2.67864300  | 2.55488900  | -0.79458700 |
| C  | 2.36099200  | 3.93826500  | -0.62095600 |
| H  | 1.85589400  | 4.48722800  | -1.40611200 |
| C  | 2.69378100  | 4.61152900  | 0.53405900  |
| H  | 2.44982400  | 5.66666400  | 0.62844500  |
| C  | 3.34334500  | 3.93828100  | 1.59264500  |
| H  | 3.60534300  | 4.47321700  | 2.50152800  |
| C  | 3.64189500  | 2.59973500  | 1.45745400  |
| H  | 4.14638200  | 2.08019200  | 2.26553500  |
| C  | 3.34081100  | 1.86105500  | 0.27142500  |
| C  | 4.67846700  | -0.26159200 | 1.25414700  |
| C  | 4.26231000  | -0.63386900 | 2.54730900  |
| H  | 3.21161700  | -0.56474800 | 2.81391700  |
| C  | 5.16551900  | -1.11112600 | 3.50287200  |
| H  | 4.80525200  | -1.39960500 | 4.48769600  |
| C  | 6.52540400  | -1.21929600 | 3.19667600  |
| H  | 7.22880900  | -1.58994000 | 3.93788900  |
| C  | 6.96965200  | -0.84211900 | 1.92585300  |
| H  | 8.02475800  | -0.91562400 | 1.67283800  |
| C  | 6.05675800  | -0.37177000 | 0.97634900  |
| H  | 6.42456100  | -0.08448400 | -0.00688200 |
| C  | 2.13657000  | -3.19943500 | -2.15754700 |
| H  | 2.46185000  | -4.23840200 | -2.30169800 |
| H  | 1.76759000  | -2.83272300 | -3.11883600 |
| H  | 1.28456900  | -3.21517100 | -1.46933200 |
| C  | 5.12304400  | -2.48927200 | -2.48858400 |
| H  | 5.01901000  | -2.02316000 | -3.47494500 |
| H  | 5.31281800  | -3.55925700 | -2.64175100 |
| H  | 6.01244500  | -2.05785900 | -2.01474500 |
| C  | 3.89564200  | -3.18857300 | 0.22524400  |
| H  | 3.88435000  | -4.25957200 | -0.01725400 |

|                   |             |             |             |   |             |             |             |
|-------------------|-------------|-------------|-------------|---|-------------|-------------|-------------|
| H                 | 3.10678900  | -3.00403900 | 0.96180600  | C | -3.15069300 | -1.03107200 | 0.46220900  |
| H                 | 4.85228800  | -2.95832900 | 0.69855200  | C | -2.60807100 | -2.19901100 | -0.23406600 |
| C                 | -0.45405400 | 1.69230700  | -0.07852600 | C | -2.45640000 | -3.46840400 | 0.42750100  |
| C                 | -0.13998700 | -0.74474700 | -0.89901600 | H | -2.78846000 | -3.54890000 | 1.45232300  |
| C                 | 0.77651400  | -0.12082200 | 1.53553900  | C | -1.95442900 | -4.58663200 | -0.18955800 |
| C                 | -2.63826600 | -0.97772000 | 3.85334900  | H | -1.89221700 | -5.52302000 | 0.35863800  |
| C                 | -3.65452400 | 0.13806200  | 3.99946400  | C | -1.52076400 | -4.52000000 | -1.53451700 |
| C                 | -4.37349100 | 2.18313300  | 3.03177300  | H | -1.11251100 | -5.39754700 | -2.02732800 |
| H                 | -4.04338200 | 2.78626900  | 3.89243800  | C | -1.63003300 | -3.33345800 | -2.21675100 |
| H                 | -5.42017200 | 1.88410400  | 3.19938100  | H | -1.30847900 | -3.30476900 | -3.25020300 |
| C                 | -4.27287300 | 3.01824100  | 1.77302200  | C | -2.18531900 | -2.15316800 | -1.62633200 |
| H                 | -4.78123100 | 3.98154000  | 1.93959800  | C | -2.38926500 | -0.93866600 | -2.43950100 |
| H                 | -3.21958400 | 3.20947500  | 1.53081400  | C | -1.99668300 | -0.88293900 | -3.81598600 |
| C                 | -4.77116600 | 2.95229000  | -0.55573700 | H | -1.50233000 | -1.72802700 | -4.27852400 |
| H                 | -3.71333500 | 2.98619400  | -0.84919400 | C | -2.24441700 | 0.22962000  | -4.58629500 |
| H                 | -5.15052400 | 3.98618800  | -0.50767100 | H | -1.94830000 | 0.23368600  | -5.63218000 |
| C                 | -5.58789800 | 2.19158500  | -1.58250200 | C | -2.87520000 | 1.36509700  | -4.02522700 |
| H                 | -6.65921100 | 2.23799800  | -1.33522500 | H | -3.06971000 | 2.24042300  | -4.63898500 |
| H                 | -5.43438100 | 2.66374600  | -2.56464400 | C | -3.24149600 | 1.34619200  | -2.69890000 |
| C                 | -5.63571200 | 0.08045200  | -2.72338300 | H | -3.73174000 | 2.21165400  | -2.26561900 |
| C                 | -5.87441300 | -1.36081200 | -2.31226300 | C | -3.03613200 | 0.20417800  | -1.85971700 |
| C                 | -4.76207800 | -3.31421600 | -1.54541500 | C | -4.43644200 | 1.39918800  | 0.10902200  |
| H                 | -4.87081100 | -3.85755900 | -2.49714800 | C | -3.97894700 | 2.70059700  | 0.39539100  |
| H                 | -5.63944700 | -3.53234100 | -0.91730200 | H | -2.91570200 | 2.91741400  | 0.35489800  |
| C                 | -3.50347000 | -3.77762100 | -0.84267800 | C | -4.85840400 | 3.72712200  | 0.75440900  |
| H                 | -3.49360800 | -4.87920500 | -0.81604100 | H | -4.46734000 | 4.71644200  | 0.98037300  |
| H                 | -2.61646000 | -3.43001800 | -1.38836200 | C | -6.23376800 | 3.48573400  | 0.82657600  |
| C                 | -2.30903300 | -3.52345300 | 1.20333300  | H | -6.91849000 | 4.28221700  | 1.10627500  |
| H                 | -1.46202100 | -3.02660700 | 0.71321500  | C | -6.71757100 | 2.20777500  | 0.53219300  |
| H                 | -2.10655700 | -4.60639800 | 1.22672000  | H | -7.78478500 | 2.00434200  | 0.57869700  |
| C                 | -2.46492000 | -3.03241100 | 2.63034900  | C | -5.82871100 | 1.18714900  | 0.17898700  |
| H                 | -3.22098500 | -3.62759200 | 3.16495000  | H | -6.22763200 | 0.20046200  | -0.04772900 |
| H                 | -1.49764600 | -3.15104100 | 3.13868200  | C | -3.63912500 | 0.59695600  | 3.14480200  |
| H                 | -6.58752300 | 0.49003000  | -3.09134000 | H | -2.71087900 | 1.15216500  | 2.97112700  |
| H                 | -4.89739300 | 0.13173000  | -3.53606500 | H | -3.74224000 | 0.44656900  | 4.22730100  |
| H                 | -6.21062500 | -1.92514100 | -3.19769900 | H | -4.46951000 | 1.22068100  | 2.80929800  |
| H                 | -6.67001300 | -1.40992100 | -1.55161400 | C | -2.37551700 | -2.10551200 | 3.41390700  |
| H                 | -3.45748600 | 0.66993900  | 4.94437600  | H | -2.61230500 | -3.17377900 | 3.47255800  |
| H                 | -4.67366800 | -0.27827100 | 4.04355700  | H | -2.44370600 | -1.70983800 | 4.43523000  |
| H                 | -2.76827100 | -1.66297100 | 4.70408200  | H | -1.33382900 | -2.00951200 | 3.09432900  |
| H                 | -1.61367900 | -0.58569400 | 3.86814200  | C | -5.30204100 | -1.92012600 | 2.52873300  |
|                   |             |             |             | H | -5.33370700 | -2.92087800 | 2.08139900  |
|                   |             |             |             | H | -6.08424100 | -1.31896600 | 2.05276100  |
|                   |             |             |             | H | -5.55605700 | -2.02068200 | 3.59162900  |
|                   |             |             |             | C | 0.66148000  | -0.31277300 | -1.48941900 |
|                   |             |             |             | C | -0.56075400 | 1.50938500  | 0.09945500  |
|                   |             |             |             | C | 0.18199900  | -0.92561200 | 1.02038500  |
|                   |             |             |             | C | 5.34639500  | -2.39370700 | -1.22342100 |
|                   |             |             |             | C | 5.00010700  | -1.37788600 | -2.29572600 |
|                   |             |             |             | C | 5.48733400  | 0.92908900  | -2.84553200 |
|                   |             |             |             | H | 5.74850900  | 0.49595400  | -3.82242200 |
|                   |             |             |             | H | 6.29527200  | 1.60161400  | -2.53877600 |
|                   |             |             |             | C | 4.19974500  | 1.73082300  | -2.97489000 |
|                   |             |             |             | H | 4.30664900  | 2.44073700  | -3.81245700 |
|                   |             |             |             | H | 3.34069200  | 1.07865600  | -3.18054000 |
|                   |             |             |             | C | 2.77546800  | 3.15565300  | -1.68419900 |
| <b>Complex 2W</b> |             |             |             |   |             |             |             |
| K                 | 3.40603500  | 0.37153400  | 0.33103300  |   |             |             |             |
| B                 | -3.51474900 | 0.19183700  | -0.36920900 |   |             |             |             |
| O                 | 1.68909500  | -0.31804700 | -2.09048800 |   |             |             |             |
| O                 | -0.31897400 | 2.62443500  | 0.40390100  |   |             |             |             |
| O                 | 0.93411500  | -1.29712400 | 1.85770600  |   |             |             |             |
| O                 | 4.57109400  | -2.13972500 | -0.05710200 |   |             |             |             |
| O                 | 5.43163300  | -0.09218600 | -1.84913900 |   |             |             |             |
| O                 | 4.00463800  | 2.43773800  | -1.75360000 |   |             |             |             |
| O                 | 3.02303600  | 3.07985200  | 0.70313600  |   |             |             |             |
| O                 | 3.21606600  | 1.46827000  | 2.96736700  |   |             |             |             |
| O                 | 4.33243300  | -1.15801300 | 2.59849400  |   |             |             |             |
| Si                | -3.59185400 | -1.10946500 | 2.32046700  |   |             |             |             |
| W                 | -0.95520800 | -0.32058700 | -0.42231300 |   |             |             |             |

|   |            |             |             |
|---|------------|-------------|-------------|
| H | 1.92682800 | 2.45992500  | -1.72965900 |
| H | 2.68674100 | 3.85642200  | -2.52980500 |
| C | 2.74161600 | 3.95060100  | -0.39024300 |
| H | 3.49041400 | 4.75695200  | -0.41129200 |
| H | 1.74080800 | 4.39028000  | -0.28617300 |
| C | 2.60727300 | 3.56957800  | 1.97505700  |
| C | 3.41252500 | 2.87418100  | 3.05706900  |
| C | 3.87392600 | 0.73461500  | 3.99386600  |
| H | 3.47219200 | 1.01949200  | 4.97918300  |
| H | 4.95370100 | 0.95202800  | 3.98429800  |
| C | 3.63999200 | -0.74678400 | 3.77818800  |
| H | 4.02641300 | -1.29847000 | 4.65007700  |
| H | 2.56618800 | -0.94744500 | 3.67628400  |
| C | 4.11980900 | -2.52984800 | 2.26966200  |
| H | 3.05852800 | -2.70335700 | 2.04672500  |
| H | 4.40973800 | -3.17228900 | 3.11656300  |
| C | 4.98446000 | -2.89170500 | 1.07834600  |
| H | 6.04121000 | -2.67861400 | 1.30098800  |
| H | 4.88103400 | -3.97048400 | 0.88030500  |
| H | 3.92059600 | -1.38555500 | -2.49764600 |
| H | 5.53201100 | -1.65541400 | -3.21906500 |
| H | 6.41795100 | -2.32090900 | -0.98391100 |
| H | 5.13957500 | -3.40733800 | -1.60213800 |
| H | 3.07996800 | 3.24476900  | 4.04004700  |
| H | 4.48259100 | 3.10951200  | 2.94238100  |
| H | 2.79842100 | 4.65070700  | 2.05336900  |
| H | 1.53177300 | 3.39130700  | 2.10340400  |

#### Complex 1Rh

|    |             |             |             |
|----|-------------|-------------|-------------|
| B  | -0.71100300 | -0.55399400 | -0.64000300 |
| O  | 4.13416200  | -0.23884100 | 2.00027100  |
| O  | 0.03413400  | -0.74393900 | 3.40684400  |
| Rh | 1.37226400  | -0.33859000 | 0.71100500  |
| Si | -1.19431200 | 2.40938700  | -0.01960900 |
| C  | -0.16909300 | 0.90430000  | -0.68152300 |
| C  | 1.12652800  | 1.11584300  | -1.21438400 |
| C  | 2.01319000  | -0.00750600 | -1.45356300 |
| C  | 1.54149000  | -1.38321600 | -1.50636900 |
| C  | 0.23508900  | -1.69457400 | -1.10113400 |
| C  | 1.66688600  | 2.49792900  | -1.54457600 |
| H  | 0.86103100  | 3.22558500  | -1.61375700 |
| H  | 2.17416300  | 2.48643800  | -2.51451400 |
| H  | 2.38366300  | 2.86582600  | -0.80334700 |
| C  | 3.43727400  | 0.27623400  | -1.90090600 |
| H  | 3.48300600  | 0.39677300  | -2.99222600 |
| H  | 4.11568100  | -0.53527400 | -1.63586000 |
| H  | 3.83195800  | 1.18926600  | -1.45421600 |
| C  | 2.49791600  | -2.44485200 | -2.02051800 |
| H  | 1.99551400  | -3.40166300 | -2.15345700 |
| H  | 3.34036100  | -2.60896500 | -1.34038300 |
| H  | 2.91703900  | -2.15346800 | -2.99004500 |
| C  | -0.22924400 | -3.14007200 | -1.13082300 |
| H  | -0.31269300 | -3.49990000 | -2.16554100 |
| H  | -1.21430600 | -3.24643400 | -0.67640900 |
| H  | 0.45715900  | -3.81442100 | -0.60721300 |
| C  | -2.22828600 | -0.90241100 | -0.32148200 |

|   |             |             |             |
|---|-------------|-------------|-------------|
| C | -2.67998200 | -1.57781700 | 0.82838000  |
| H | -1.97018000 | -1.85588100 | 1.60324200  |
| C | -4.02865800 | -1.89539800 | 1.01455600  |
| H | -4.34246500 | -2.40653600 | 1.92115900  |
| C | -4.97193500 | -1.55738100 | 0.03944400  |
| H | -6.02067000 | -1.80384100 | 0.18114100  |
| C | -4.55034300 | -0.90193000 | -1.12074900 |
| H | -5.27125700 | -0.63795900 | -1.89050800 |
| C | -3.19978000 | -0.58082300 | -1.29140800 |
| H | -2.89546700 | -0.06817100 | -2.20209500 |
| C | -2.52185500 | 1.92418500  | 1.24791800  |
| H | -2.94088600 | 2.84881800  | 1.66375800  |
| H | -2.10353400 | 1.35059600  | 2.08078000  |
| H | -3.33990800 | 1.34352100  | 0.81935500  |
| C | -0.09228000 | 3.66667200  | 0.90810400  |
| H | -0.72091600 | 4.25145900  | 1.58944200  |
| H | 0.42338200  | 4.37398700  | 0.25312700  |
| H | 0.66386700  | 3.15789900  | 1.51596600  |
| C | -2.06029400 | 3.28529200  | -1.47581400 |
| H | -2.78008100 | 2.61704600  | -1.95970000 |
| H | -1.35715600 | 3.62743700  | -2.24260400 |
| H | -2.61128700 | 4.16199200  | -1.11576400 |
| C | 3.08993100  | -0.27655400 | 1.50989000  |
| C | 0.52529800  | -0.59572200 | 2.37363100  |

#### Complex 2Rh

|    |             |             |             |
|----|-------------|-------------|-------------|
| B  | 0.87654000  | 0.57143900  | -0.55578300 |
| O  | 0.67310900  | -0.83807600 | 3.45118300  |
| O  | -3.45286300 | 0.55546700  | 2.86648600  |
| Rh | -1.03393600 | -0.05613400 | 1.08311900  |
| Si | 1.21495300  | -2.46627000 | -0.46314100 |
| C  | 0.21388800  | -0.82079000 | -0.66060600 |
| C  | -1.16206900 | -0.88325300 | -1.14202400 |
| C  | -1.77679200 | -2.10381200 | -1.57473200 |
| H  | -1.15538400 | -2.98202900 | -1.68156000 |
| C  | -3.11169400 | -2.19546500 | -1.88509600 |
| H  | -3.52540900 | -3.13906400 | -2.22878100 |
| C  | -3.94874700 | -1.06504700 | -1.73615100 |
| H  | -5.01201900 | -1.14059300 | -1.94358600 |
| C  | -3.41053900 | 0.13596800  | -1.34433700 |
| H  | -4.06860500 | 0.99182900  | -1.26244500 |
| C  | -2.01014700 | 0.29997400  | -1.07902300 |
| C  | -1.43201000 | 1.66881900  | -0.96523200 |
| C  | -2.24159800 | 2.82373400  | -1.08774000 |
| H  | -3.31110800 | 2.74150700  | -1.23695800 |
| C  | -1.68537200 | 4.09418200  | -1.04796600 |
| H  | -2.32922800 | 4.96230800  | -1.15995400 |
| C  | -0.30185500 | 4.26026000  | -0.87704100 |
| H  | 0.13126500  | 5.25618800  | -0.85330600 |
| C  | 0.50250600  | 3.13910500  | -0.73891100 |
| H  | 1.57162100  | 3.26118100  | -0.59883600 |
| C  | -0.02678200 | 1.82610100  | -0.77401200 |
| C  | 2.42541800  | 0.81135000  | -0.32139400 |
| C  | 2.96658700  | 1.27772900  | 0.89161900  |
| H  | 2.31030000  | 1.44758000  | 1.74201300  |
| C  | 4.33504500  | 1.52425400  | 1.03818100  |

|   |             |             |             |
|---|-------------|-------------|-------------|
| H | 4.72218600  | 1.87063600  | 1.99298800  |
| C | 5.20305700  | 1.32995200  | -0.04034500 |
| H | 6.26657900  | 1.52327000  | 0.06975500  |
| C | 4.68855000  | 0.88929700  | -1.26322100 |
| H | 5.35129000  | 0.74198200  | -2.11217700 |
| C | 3.32034100  | 0.63247100  | -1.39534700 |
| H | 2.94286800  | 0.28713400  | -2.35589500 |
| C | 2.76829600  | -2.30348200 | 0.61589500  |
| H | 2.54652600  | -1.91725300 | 1.61464400  |
| H | 3.53687300  | -1.66822900 | 0.17342800  |
| H | 3.18868100  | -3.30922300 | 0.74062500  |
| C | 1.77035400  | -3.05386800 | -2.19098600 |
| H | 2.44612400  | -2.32672700 | -2.65318700 |
| H | 0.92883600  | -3.20479000 | -2.87534700 |
| H | 2.31042800  | -4.00465000 | -2.11208800 |
| C | 0.17675700  | -3.84728800 | 0.36274800  |
| H | 0.83227200  | -4.46507900 | 0.98684000  |
| H | -0.30375000 | -4.51482600 | -0.35976400 |
| H | -0.60679900 | -3.43846000 | 1.00862300  |
| C | 0.04598900  | -0.53408600 | 2.53263900  |
| C | -2.54259200 | 0.34136200  | 2.19744000  |

**[CpCr(CO)<sub>3</sub>]<sup>-</sup>**

|    |             |             |             |
|----|-------------|-------------|-------------|
| C  | -1.83314700 | -1.15516500 | 0.38581600  |
| C  | 1.10558200  | 1.29769400  | -0.75129300 |
| C  | -1.83425200 | 0.70934500  | -0.97364600 |
| C  | 1.10574300  | -1.29825100 | -0.75025000 |
| C  | 1.12313300  | 0.00062500  | 1.48652000  |
| Cr | 0.09078600  | -0.00003800 | -0.00122500 |
| O  | 1.73301600  | -2.16586800 | -1.24844400 |
| H  | -1.82209500 | 2.18422700  | 0.71904600  |
| C  | -1.83424900 | -0.71051400 | -0.97285000 |
| H  | -1.79510100 | 0.00124800  | 2.29876600  |
| C  | -1.83313600 | 1.15551400  | 0.38452500  |
| H  | -1.81825800 | 1.34355300  | -1.85037100 |
| H  | -1.81824700 | -1.34570400 | -1.84886300 |
| H  | -1.82211700 | -2.18350400 | 0.72148500  |
| C  | -1.82295200 | 0.00064100  | 1.21668600  |
| O  | 1.73272800  | 2.16499100  | -1.25020400 |
| O  | 1.76383300  | 0.00109800  | 2.47818400  |

**[CpMo(CO)<sub>3</sub>]<sup>-</sup>**

|   |             |             |             |
|---|-------------|-------------|-------------|
| C | -2.05829200 | -1.15600600 | 0.38056700  |
| C | 1.23966000  | 1.36954600  | -0.78983200 |
| C | -2.05491500 | 0.71076000  | -0.97806100 |
| C | 1.23968600  | -1.36873800 | -0.79118400 |
| C | 1.24968600  | -0.00071800 | 1.57387300  |
| O | 1.88709200  | -2.22489800 | -1.28507700 |
| H | -2.06373800 | 2.18429600  | 0.71721500  |
| C | -2.05489200 | -0.70982000 | -0.97874900 |
| H | -2.03918800 | -0.00111100 | 2.29614800  |
| C | -2.05829900 | 1.15563300  | 0.38168600  |
| H | -2.05336700 | 1.34650000  | -1.85410700 |
| H | -2.05329700 | -1.34468500 | -1.85543200 |
| H | -2.06372100 | -2.18499100 | 0.71510700  |
| C | -2.04796200 | -0.00058900 | 1.21351800  |

|    |            |             |             |
|----|------------|-------------|-------------|
| O  | 1.88713900 | 2.22601500  | -1.28309500 |
| O  | 1.90344200 | -0.00118800 | 2.55792600  |
| Mo | 0.09818800 | 0.00000300  | -0.00018700 |

**[CpW(CO)<sub>3</sub>]<sup>-</sup>**

|   |             |             |             |
|---|-------------|-------------|-------------|
| C | -2.04532300 | -1.16708400 | 0.35615500  |
| C | 1.20623600  | 1.38857400  | -0.75852400 |
| C | -2.04038200 | 0.73405000  | -0.96136700 |
| C | 1.20661100  | -1.35075100 | -0.82313800 |
| C | 1.21929700  | -0.03678700 | 1.57227700  |
| O | 1.84089800  | -2.20694800 | -1.34193400 |
| H | -2.05339800 | 2.16894000  | 0.76944800  |
| C | -2.04023500 | -0.68856100 | -0.99463800 |
| H | -2.01960200 | -0.05390200 | 2.29797700  |
| C | -2.04559500 | 1.14886800  | 0.41033300  |
| H | -2.04076000 | 1.38893500  | -1.82259100 |
| H | -2.04048300 | -1.30246000 | -1.88553900 |
| H | -2.05288000 | -2.20283600 | 0.66717400  |
| C | -2.02913600 | -0.02858900 | 1.21607100  |
| O | 1.84119400  | 2.26686800  | -1.23808200 |
| O | 1.86146300  | -0.06062000 | 2.56781700  |
| W | 0.07121400  | 0.00011600  | -0.00043100 |

**[(Mesitylene)Cr(CO)<sub>3</sub>]**

|    |             |             |             |
|----|-------------|-------------|-------------|
| C  | 1.34585000  | 0.54016400  | -1.31883100 |
| C  | -1.51973200 | 0.51723600  | -1.40065700 |
| C  | -1.51919700 | -1.47209100 | 0.25297400  |
| C  | -1.51908000 | 0.95447400  | 1.14876000  |
| O  | -2.17794300 | 0.84944600  | -2.30058600 |
| O  | -2.17698300 | -2.41782100 | 0.41534900  |
| C  | 1.35264500  | -0.86376300 | -1.11487800 |
| C  | 1.34617700  | 0.87201900  | 1.12684400  |
| O  | -2.17705900 | 1.56802200  | 1.88638400  |
| C  | 1.34627300  | -1.41186500 | 0.19144200  |
| C  | 1.35265900  | 1.39735500  | -0.19098000 |
| H  | 1.33260000  | -1.52782800 | -1.97264200 |
| C  | 1.35287700  | -0.53331300 | 1.30535300  |
| H  | 1.33339500  | -0.94423300 | 2.30929600  |
| H  | 1.33286500  | 2.47224900  | -0.33708700 |
| Cr | -0.44278400 | -0.00012800 | 0.00000800  |
| C  | 1.38713100  | 1.11008300  | -2.71482400 |
| H  | 2.42898800  | 1.22820600  | -3.03745000 |
| H  | 0.88615000  | 0.45239000  | -3.42980100 |
| H  | 0.90730400  | 2.09112700  | -2.75980400 |
| C  | 1.38800900  | 1.79623100  | 2.31823600  |
| H  | 2.43002600  | 2.01485800  | 2.58263300  |
| H  | 0.88885100  | 2.74506600  | 2.10541700  |
| H  | 0.90669400  | 1.34572300  | 3.19005600  |
| C  | 1.38807400  | -2.90584100 | 0.39564100  |
| H  | 2.43006900  | -3.24412800 | 0.45327700  |
| H  | 0.88828800  | -3.19648300 | 1.32326200  |
| H  | 0.90733600  | -3.43519800 | -0.43102100 |



| <b>[(Mesitylene)Mo(CO)<sub>3</sub>]</b> |             |             |             |
|-----------------------------------------|-------------|-------------|-------------|
| C                                       | 1.53179100  | -1.17131400 | 0.81695200  |
| C                                       | -1.63329900 | -1.30143200 | 0.90885900  |
| C                                       | -1.63329900 | 1.43766900  | 0.67282800  |
| C                                       | -1.63365000 | -0.13628500 | -1.58113200 |
| O                                       | -2.28979300 | -2.09002900 | 1.45957900  |
| O                                       | -2.28978700 | 2.30888200  | 1.08047700  |
| C                                       | 1.54679000  | 0.12084600  | 1.40881800  |
| C                                       | 1.53142300  | -0.12198700 | -1.42319000 |
| O                                       | -2.29043600 | -0.21878900 | -2.53925000 |
| C                                       | 1.53168400  | 1.29335400  | 0.60567600  |
| C                                       | 1.54652700  | -1.28060900 | -0.60007200 |
| H                                       | 1.54798800  | 0.21350900  | 2.48975100  |
| C                                       | 1.54646200  | 1.15981600  | -0.80929700 |
| H                                       | 1.54740400  | 2.04961400  | -1.42999300 |
| H                                       | 1.54754600  | -2.26306700 | -1.06026800 |
| C                                       | 1.59325700  | -2.40766300 | 1.67943100  |
| H                                       | 2.63969200  | -2.67820600 | 1.86804000  |
| H                                       | 1.10799900  | -2.24364600 | 2.64489600  |
| H                                       | 1.10780900  | -3.25705600 | 1.19221600  |
| C                                       | 1.59256600  | -0.25075800 | -2.92514400 |
| H                                       | 2.63893500  | -0.27963600 | -3.25389600 |
| H                                       | 1.10654500  | -1.16849400 | -3.26579700 |
| H                                       | 1.10773000  | 0.59628500  | -3.41702600 |
| C                                       | 1.59309600  | 2.65847100  | 1.24514300  |
| H                                       | 2.63952300  | 2.95715700  | 1.38503600  |
| H                                       | 1.10774400  | 3.41257100  | 0.62043000  |
| H                                       | 1.10778600  | 2.66117900  | 2.22441100  |
| Mo                                      | -0.45063500 | -0.00003300 | 0.00006000  |

| <b>[(Mesitylene)W(CO)<sub>3</sub>]</b> |             |             |             |
|----------------------------------------|-------------|-------------|-------------|
| C                                      | 1.57709200  | -0.04898700 | -1.43083000 |
| C                                      | -1.53465300 | -0.05361500 | -1.58442700 |
| C                                      | -1.53360100 | -1.34631900 | 0.83917600  |
| C                                      | -1.53381900 | 1.39907600  | 0.74672600  |
| O                                      | -2.18645200 | -0.08619700 | -2.55125300 |
| O                                      | -2.18482000 | -2.16765500 | 1.35101200  |
| C                                      | 1.59682600  | -1.25139400 | -0.66680200 |
| C                                      | 1.57730500  | 1.26382200  | 0.67194900  |
| O                                      | -2.18504000 | 2.25303600  | 1.20205800  |
| C                                      | 1.57823900  | -1.21363200 | 0.75749200  |
| C                                      | 1.59608500  | 1.20338200  | -0.75138500 |
| H                                      | 1.59260600  | -2.20869300 | -1.17623800 |
| C                                      | 1.59698600  | 0.04922300  | 1.41679200  |
| H                                      | 1.59291400  | 0.08665000  | 2.50055500  |
| H                                      | 1.59123300  | 2.12322800  | -1.32568600 |
| C                                      | 1.63064200  | -0.10127900 | -2.93718300 |
| H                                      | 2.67560100  | -0.11336400 | -3.27116300 |
| H                                      | 1.14196700  | -1.00038200 | -3.32098000 |
| H                                      | 1.14271900  | 0.76944000  | -3.38244200 |
| C                                      | 1.63100700  | 2.59445000  | 1.37995200  |
| H                                      | 2.67600300  | 2.89013500  | 1.53546300  |

|   |             |             |            |
|---|-------------|-------------|------------|
| H | 1.14139900  | 3.37629200  | 0.79386500 |
| H | 1.14412800  | 2.54429900  | 2.35714600 |
| C | 1.63309200  | -2.49199600 | 1.55591400 |
| H | 2.67835100  | -2.77403800 | 1.73344700 |
| H | 1.14424300  | -2.37538600 | 2.52644000 |
| H | 1.14616900  | -3.31349100 | 1.02438200 |
| W | -0.35281100 | -0.00019700 | 0.00008700 |

| <b>[CpRh(CO)<sub>2</sub>]</b> |             |             |             |
|-------------------------------|-------------|-------------|-------------|
| Rh                            | 0.19615400  | -0.00016000 | -0.00776600 |
| C                             | 1.50736900  | -1.34959200 | 0.01222500  |
| O                             | 2.30421000  | -2.18461800 | 0.01746400  |
| C                             | 1.50639800  | 1.35029600  | 0.01222900  |
| O                             | 2.30229000  | 2.18621900  | 0.01748500  |
| C                             | -1.77461100 | -1.14298900 | -0.38120800 |
| C                             | -1.86142000 | -0.69816000 | 0.99742400  |
| C                             | -1.86131600 | 0.70318300  | 0.99333400  |
| C                             | -1.77540500 | 1.14028600  | -0.38806100 |
| C                             | -1.82817700 | -0.00373200 | -1.23276500 |
| H                             | -1.78385500 | -2.17572400 | -0.70484400 |
| H                             | -1.88426200 | -1.34035000 | 1.86714700  |
| H                             | -1.88461000 | 1.35038400  | 1.85933700  |
| H                             | -1.78516000 | 2.17114800  | -0.71757000 |
| H                             | -1.81806600 | -0.00681900 | -2.31325700 |

| <b>[(Mesitylene)Rh(CO)<sub>2</sub>]<sup>+</sup></b> |             |             |             |
|-----------------------------------------------------|-------------|-------------|-------------|
| O                                                   | 2.84701200  | 2.02069600  | 0.00043200  |
| O                                                   | 2.64402000  | -2.26787500 | 0.00055200  |
| Rh                                                  | 0.59622300  | -0.02787900 | 0.00006300  |
| C                                                   | -1.44109200 | -0.63722100 | 1.25820000  |
| C                                                   | -1.38747100 | 0.76715000  | 1.23357000  |
| C                                                   | -1.29802500 | 1.47975000  | -0.00043200 |
| C                                                   | -1.38718000 | 0.76678500  | -1.23416900 |
| C                                                   | -1.44043700 | -0.63763600 | -1.25840300 |
| C                                                   | -1.26289500 | 2.98636500  | -0.00055300 |
| H                                                   | -2.29211000 | 3.36639200  | 0.00182600  |
| H                                                   | -0.76821600 | 3.38167800  | -0.89078900 |
| H                                                   | -0.76423400 | 3.38171800  | 0.88746200  |
| C                                                   | -1.57881000 | -1.40958400 | -2.54213600 |
| H                                                   | -2.64053200 | -1.61257400 | -2.72950000 |
| H                                                   | -1.06577300 | -2.37318600 | -2.49197000 |
| H                                                   | -1.18973800 | -0.84805400 | -3.39423400 |
| C                                                   | 2.00951100  | 1.24359300  | 0.00022900  |
| C                                                   | 1.88140600  | -1.41605300 | 0.00028200  |
| C                                                   | -1.35132900 | -1.31434800 | 0.00001800  |
| H                                                   | -1.39103300 | 1.32473100  | 2.16500800  |
| H                                                   | -1.39054900 | 1.32401700  | -2.16581500 |
| H                                                   | -1.33405800 | -2.40085300 | 0.00024400  |
| C                                                   | -1.58040200 | -1.40887700 | 2.54201800  |
| H                                                   | -1.19266300 | -0.84686700 | 3.39439400  |
| H                                                   | -2.64224400 | -1.61237200 | 2.72819900  |
| H                                                   | -1.06680400 | -2.37220800 | 2.49270900  |

## References

1. T. A. Bartholome, A. Kaur, D. J. D. Wilson, J. L. Dutton and C. D. Martin, *Angew. Chem. Int. Ed.*, 2020, **59**, 11470-11476.
2. Gaussian 16, Revision C.01, M. J. Frisch, G. W. Trucks, H. B. Schlegel, G. E. Scuseria, M. A. Robb, J. R. Cheeseman, G. Scalmani, V. Barone, G. A. Petersson, H. Nakatsuji, X. Li, M. Caricato, A. V. Marenich, J. Bloino, B. G. Janesko, R. Gomperts, B. Mennucci, H. P. Hratchian, J. V. Ortiz, A. F. Izmaylov, J. L. Sonnenberg, D. Williams-Young, F. Ding, F. Lipparini, F. Egidi, J. Goings, B. Peng, A. Petrone, T. Henderson, D. Ranasinghe, V. G. Zakrzewski, J. Gao, N. Rega, G. Zheng, W. Liang, M. Hada, M. Ehara, K. Toyota, R. Fukuda, J. Hasegawa, M. Ishida, T. Nakajima, Y. Honda, O. Kitao, H. Nakai, T. Vreven, K. Throssell, J. A. Montgomery, Jr., J. E. Peralta, F. Ogliaro, M. J. Bearpark, J. J. Heyd, E. N. Brothers, K. N. Kudin, V. N. Staroverov, T. A. Keith, R. Kobayashi, J. Normand, K. Raghavachari, A. P. Rendell, J. C. Burant, S. S. Iyengar, J. Tomasi, M. Cossi, J. M. Millam, M. Klene, C. Adamo, R. Cammi, J. W. Ochterski, R. L. Martin, K. Morokuma, O. Farkas, J. B. Foresman, and D. J. Fox, Gaussian, Inc., Wallingford CT, 2016.
3. A.D. Becke, *J. Chem. Phys.* 1993, **98**, 5648-5652.
4. G. A. Petersson, A. Bennett, T. G. Tensfeldt, M. A. Al-Laham, W. A. Shirley, and J. Mantzaris., *J. Chem. Phys.* 1988, **89**, 2193-2218.
5. A. D. Becke, *J. Chem. Phys.* 1993, **98**, 1372-1377.
